# Supplementary material for: Coordination capabilities of bis-(2-pyridyl)amides in the field of divalent germanium, tin and lead compounds
Source: Royal Society of Chemistry journal article supplement (doi:10.1039/d1dt00717c), 2021-01-01
Supplement: d1dt00717c3.pdf [file d1dt00717c3.pdf]

ESI for:

**Coordination capabilities of bis-(2-pyridyl)amides in the field of divalent germanium, tin and lead compounds.**

Jan Zechovský, Ondřej Mrózek, Maksim Samsonov, Roman Jambor, Aleš Růžička and Libor Dostál\*

\*E-mail: libor.dostal@upce.cz (L.D.)

**Table of contents:**

|                                                |                |
|------------------------------------------------|----------------|
| 1) NMR spectra of studied compounds            | <b>S2-S25</b>  |
| 2) Crystallographic data for studied compounds | <b>S26-S30</b> |
| 3) Theoretical study                           | <b>S31-S35</b> |

## 1) NMR spectra of studied compounds.

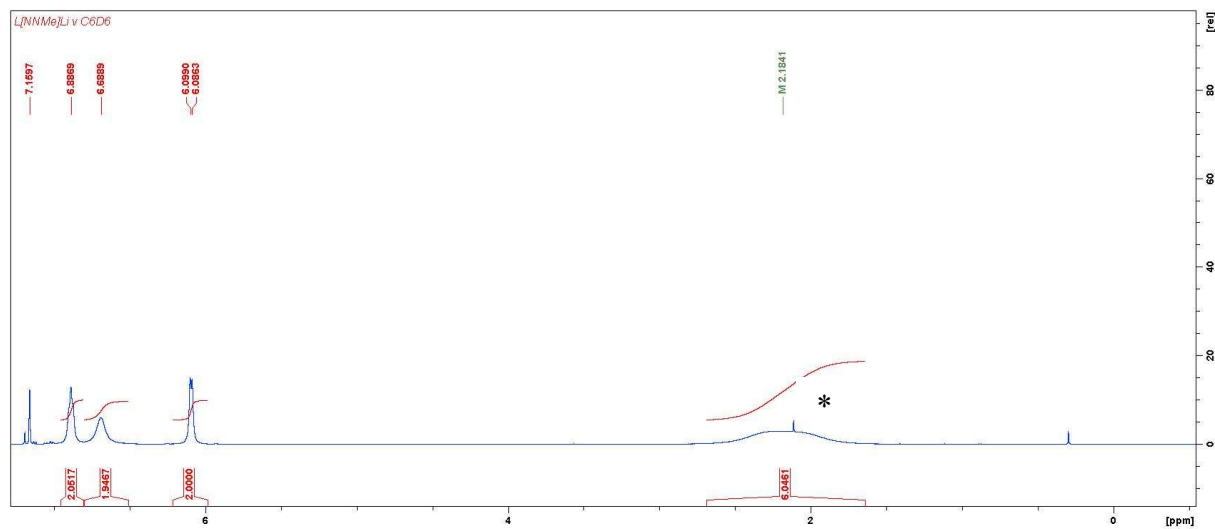

**Figure S1:**  $^1\text{H}$  NMR spectrum of **2** in  $\text{C}_6\text{D}_6$  (\* traces of toluene).

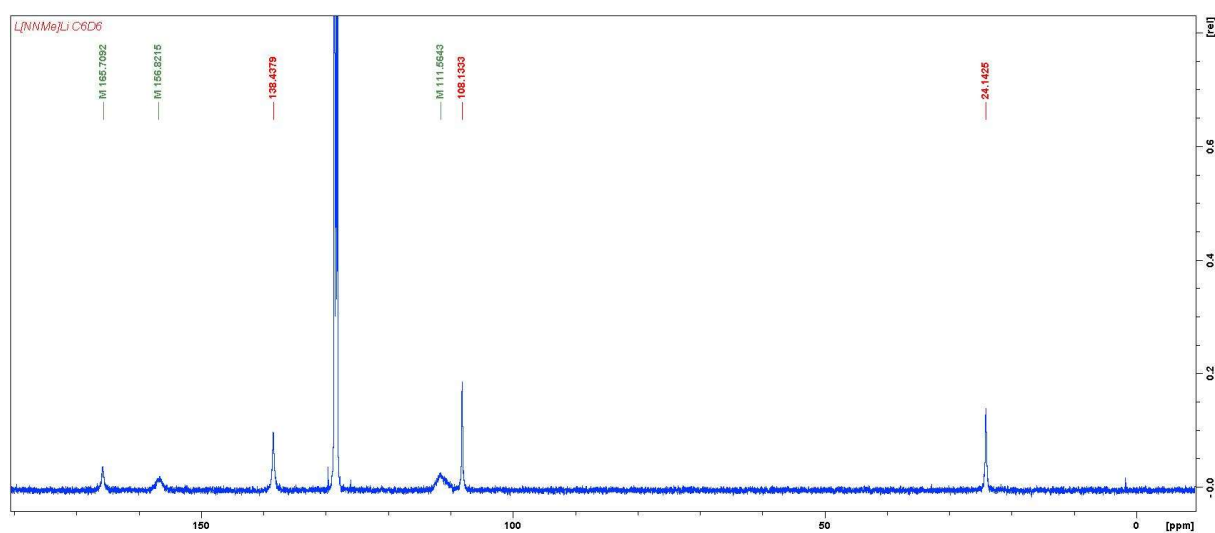

**Figure S2:**  $^{13}\text{C}\{^1\text{H}\}$  NMR spectrum of **2** in  $\text{C}_6\text{D}_6$ .

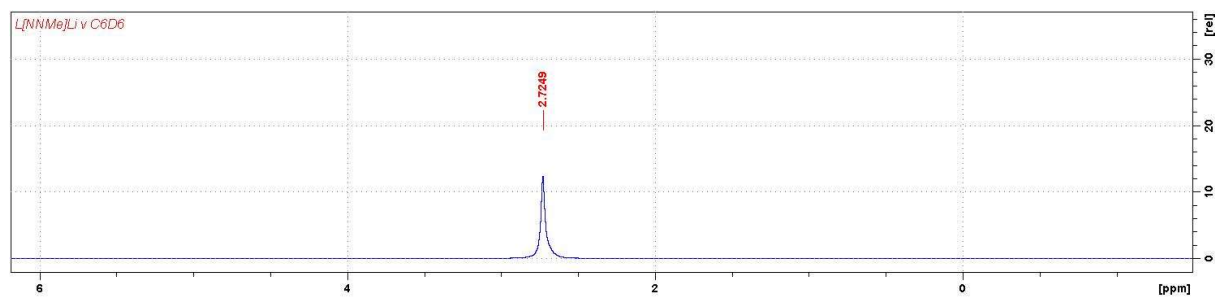

**Figure S3:**  $^7\text{Li}\{^1\text{H}\}$  NMR spectrum of **2** in  $\text{C}_6\text{D}_6$ .

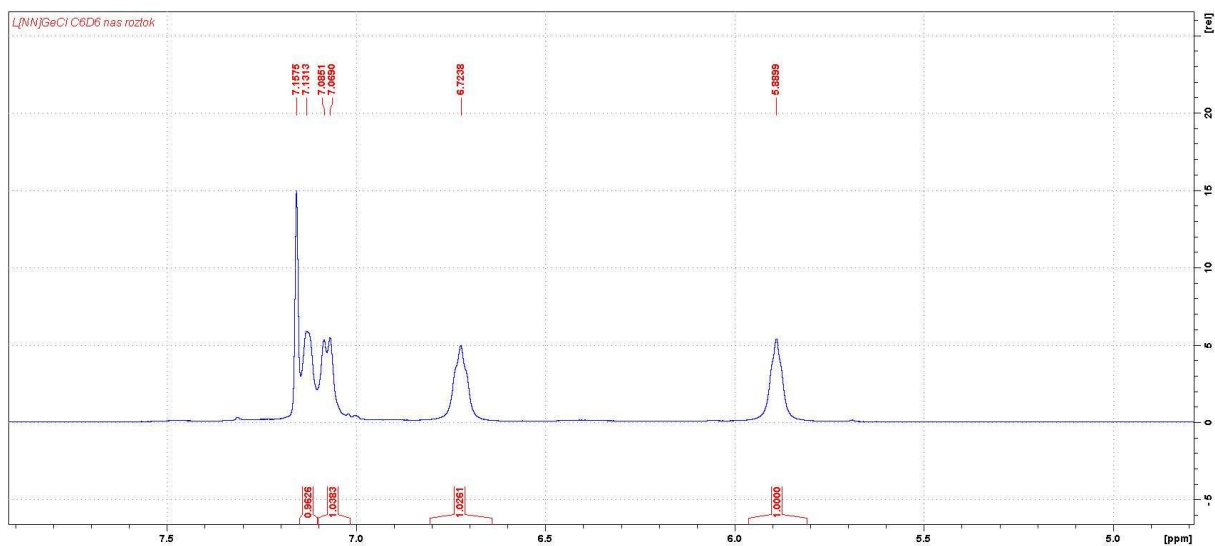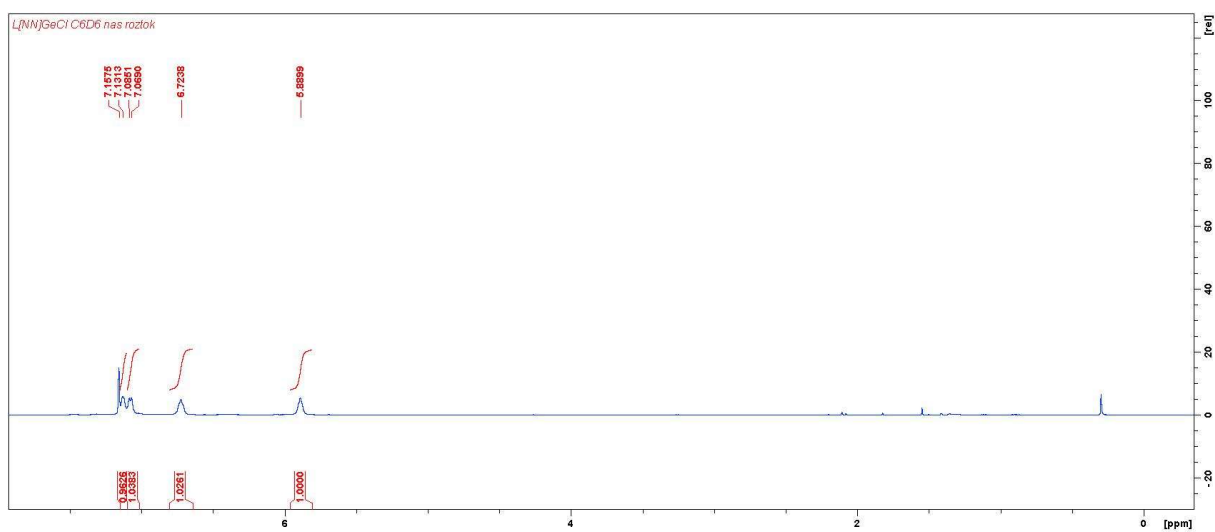

Figure S4:  $^1\text{H}$  NMR spectrum of **3** in  $\text{C}_6\text{D}_6$ .

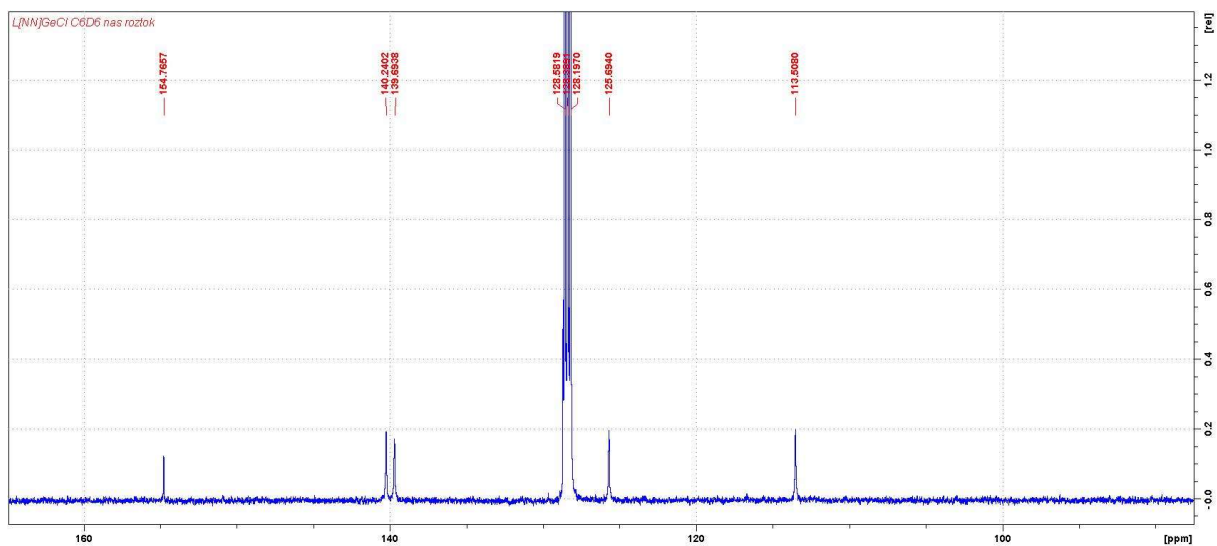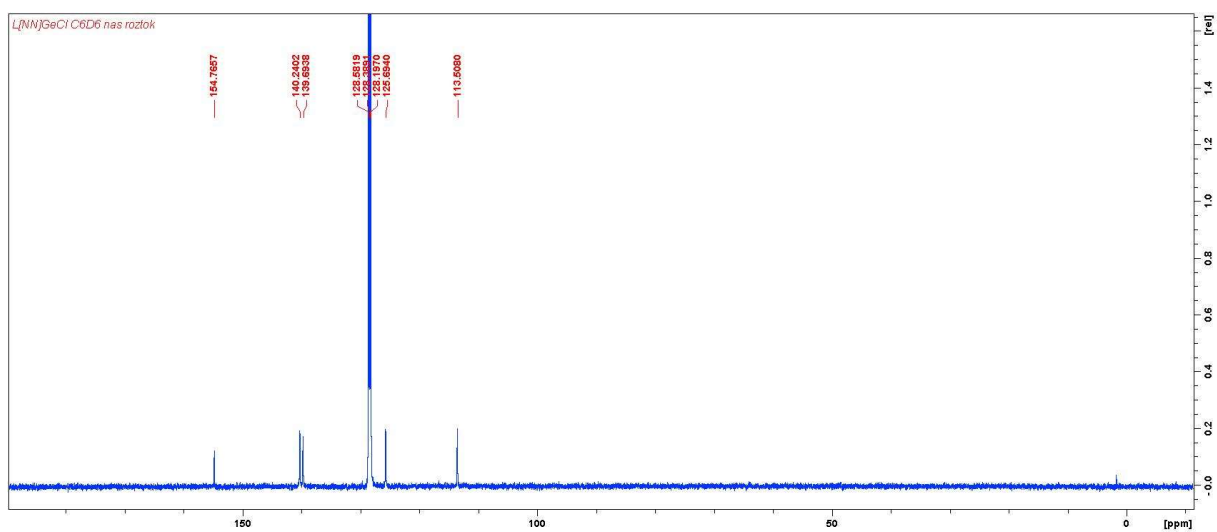

**Figure S5:**  $^{13}\text{C}\{^1\text{H}\}$  NMR spectrum of **3** in  $\text{C}_6\text{D}_6$ .

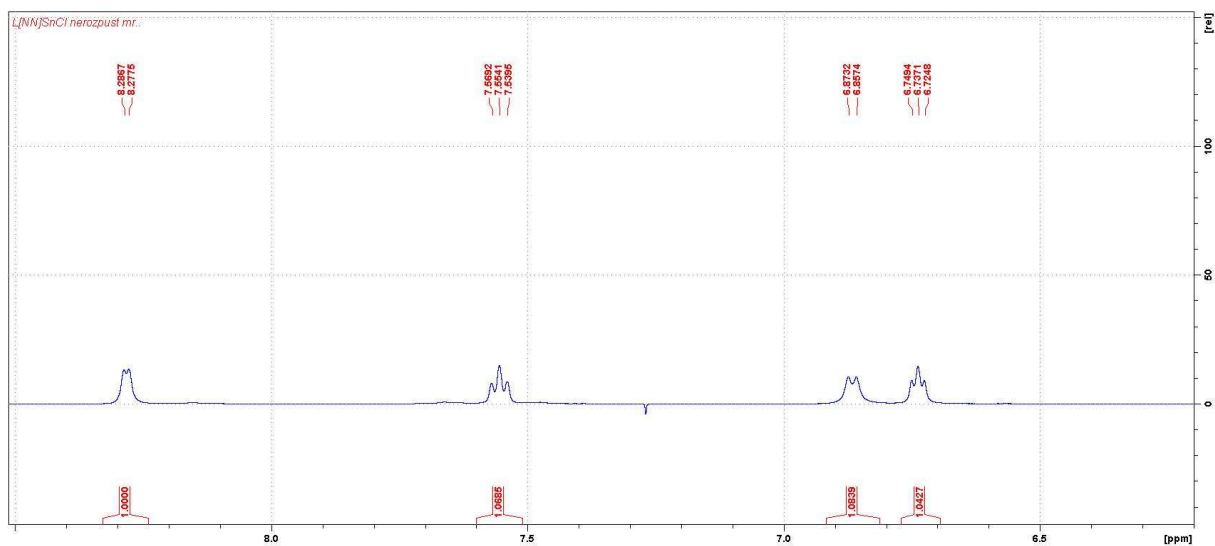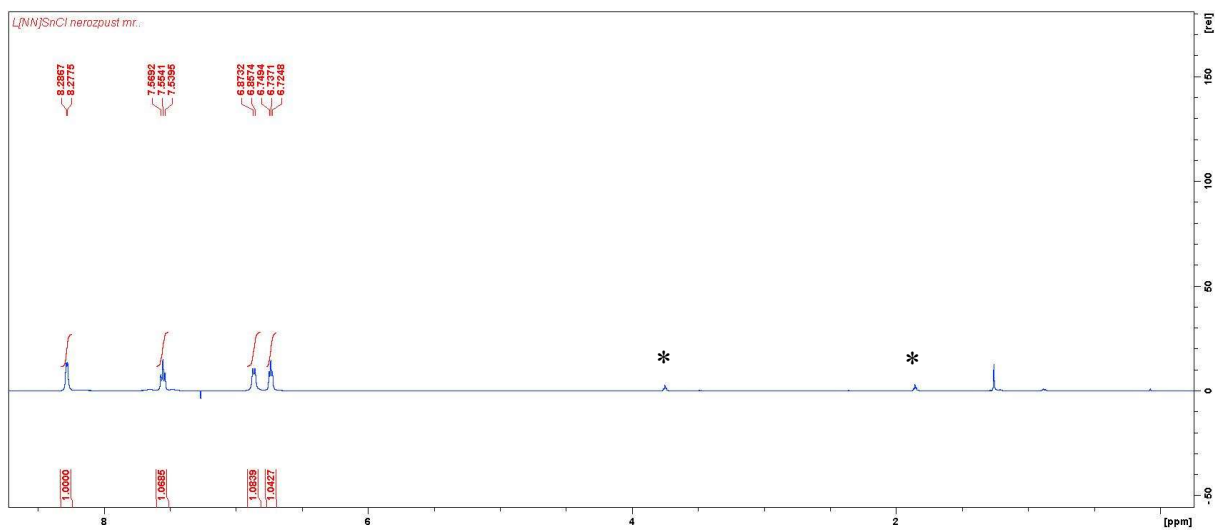

**Figure S6:** <sup>1</sup>H NMR spectrum of **4** in CDCl<sub>3</sub> (\* traces of thf).

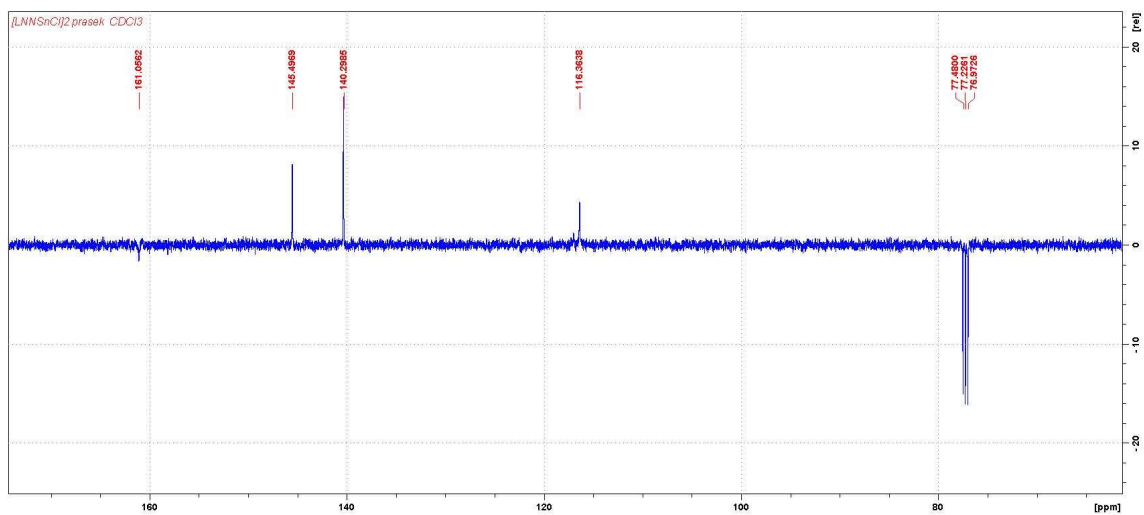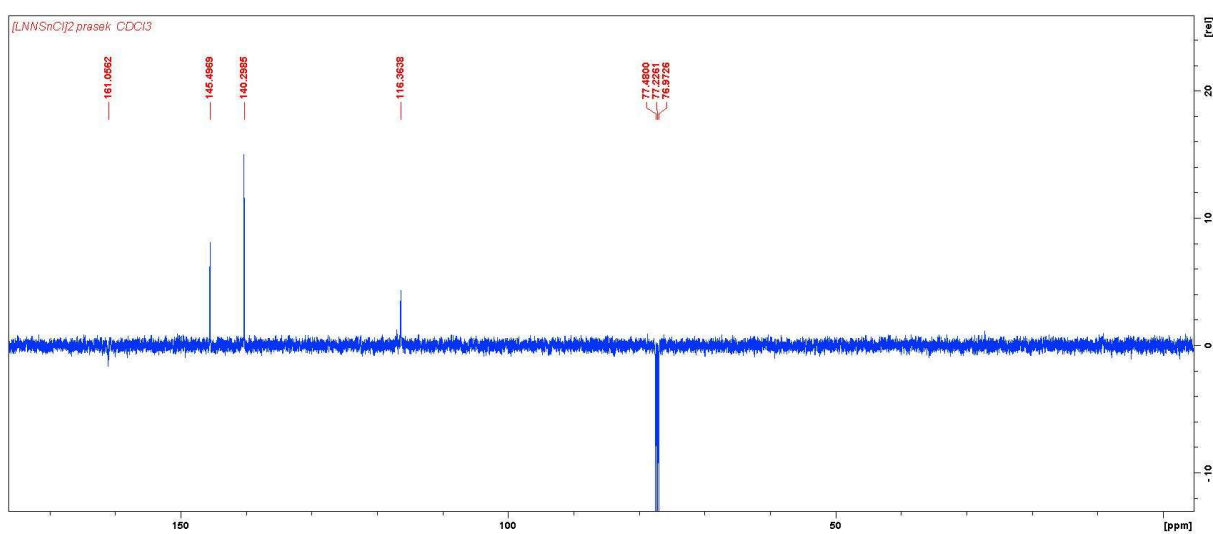

**Figure S7:**  $^{13}\text{C}\{^1\text{H}\}$ -APT NMR spectrum of **4** in  $\text{CDCl}_3$ .

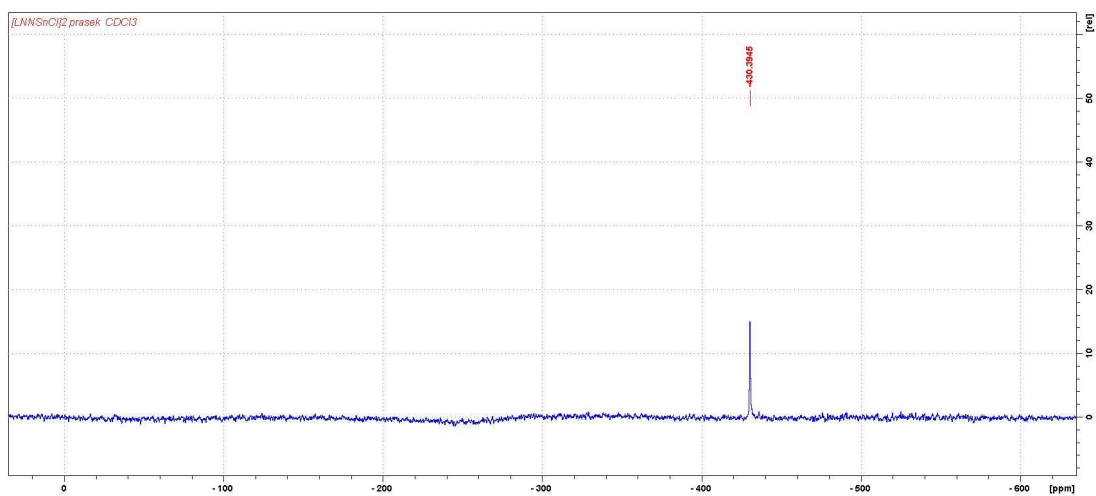

**Figure S8:**  $^{119}\text{Sn}\{^1\text{H}\}$  NMR spectrum of **4** in  $\text{CDCl}_3$ .

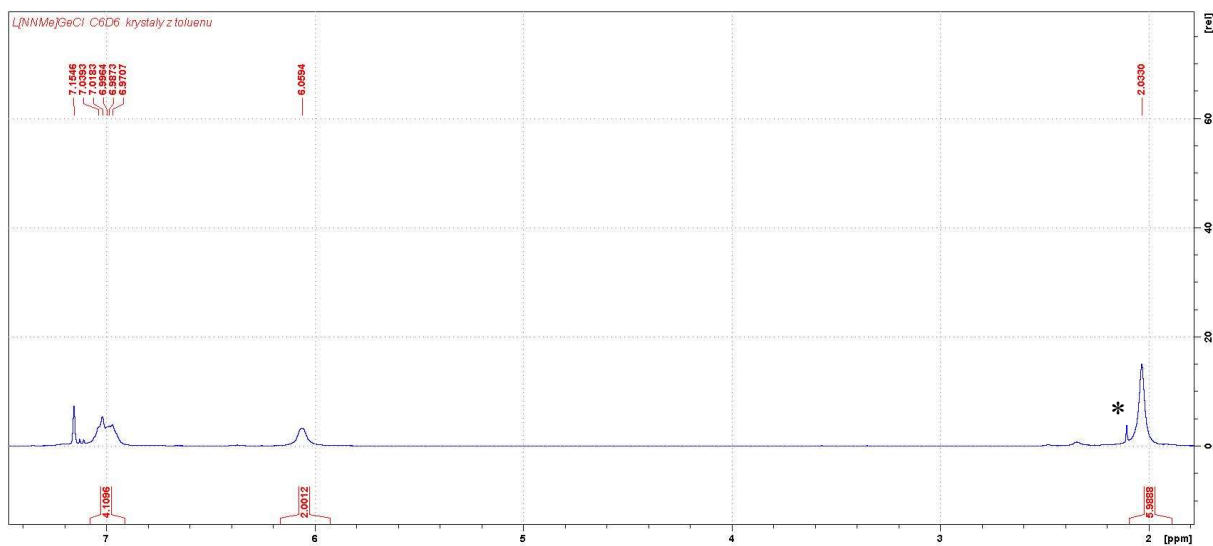

**Figure S9:**  $^1\text{H}$  NMR spectrum of **5** in  $\text{C}_6\text{D}_6$  (\* traces of toluene).

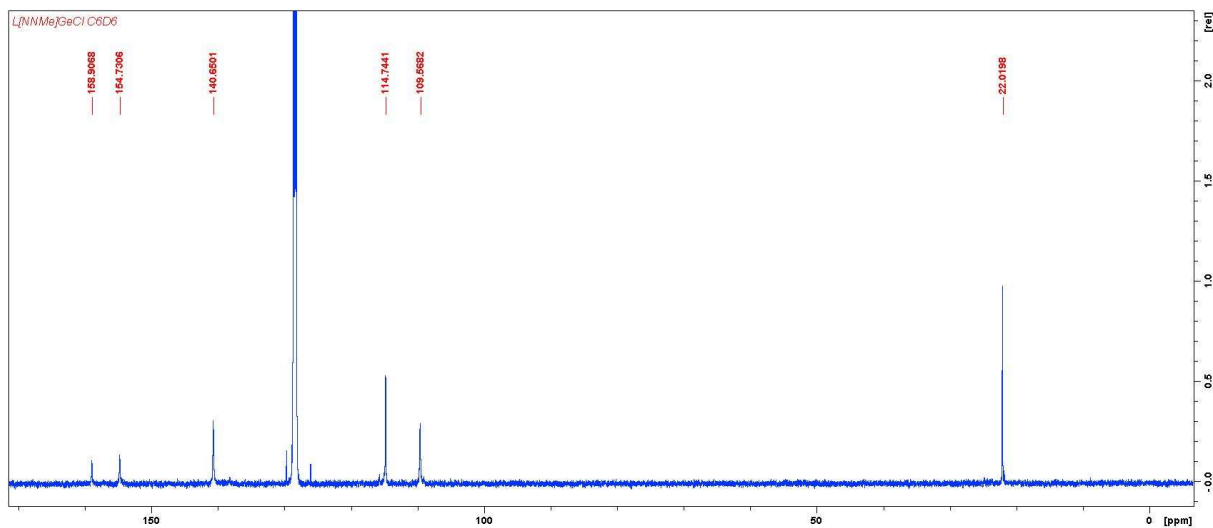

**Figure S10:**  $^{13}\text{C}\{^1\text{H}\}$  NMR spectrum of **5** in  $\text{C}_6\text{D}_6$ .

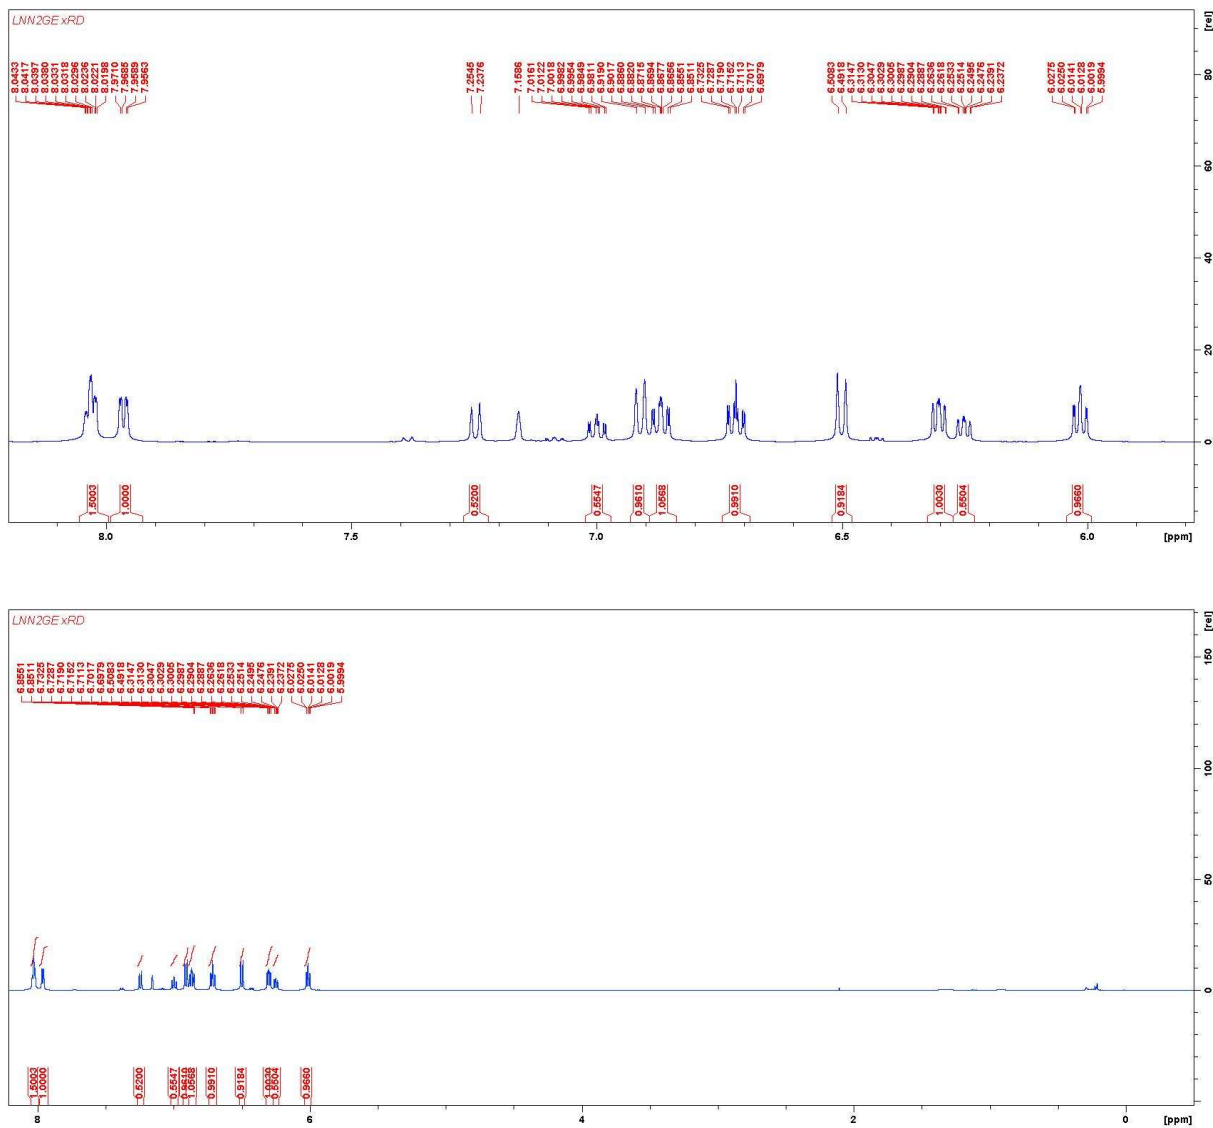

Figure S11:  $^1\text{H}$  NMR spectrum of **6** in  $\text{C}_6\text{D}_6$ .



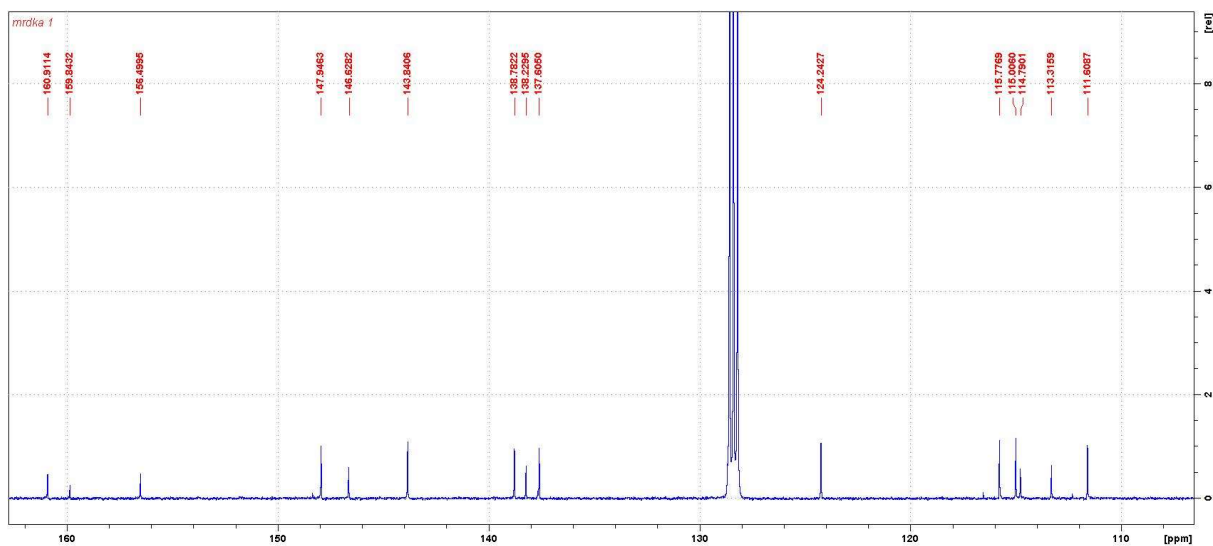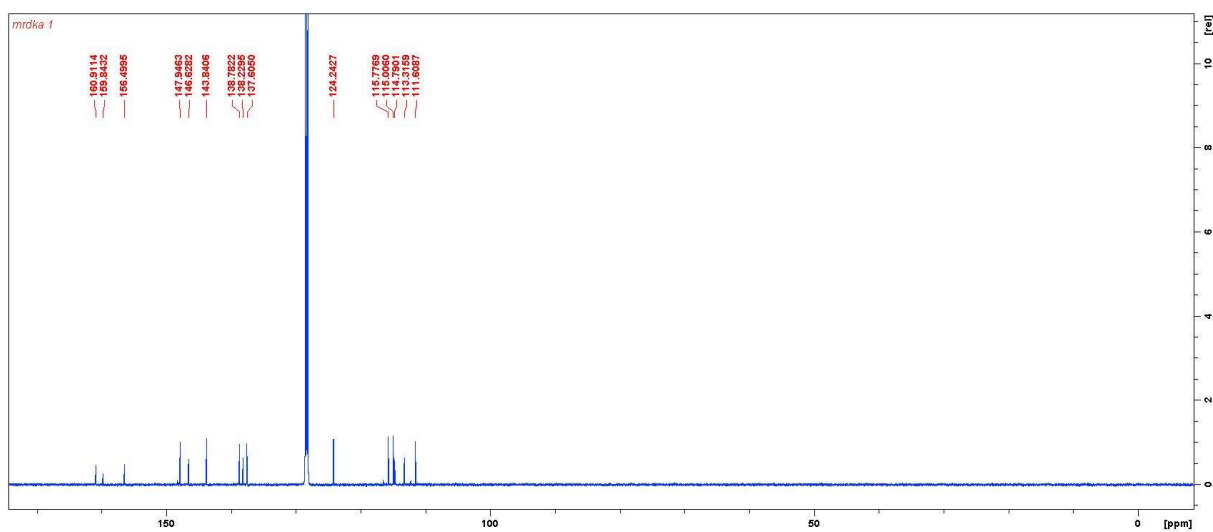

Figure S12:  $^{13}\text{C}\{^1\text{H}\}$  NMR spectrum of **6** in  $\text{C}_6\text{D}_6$ .

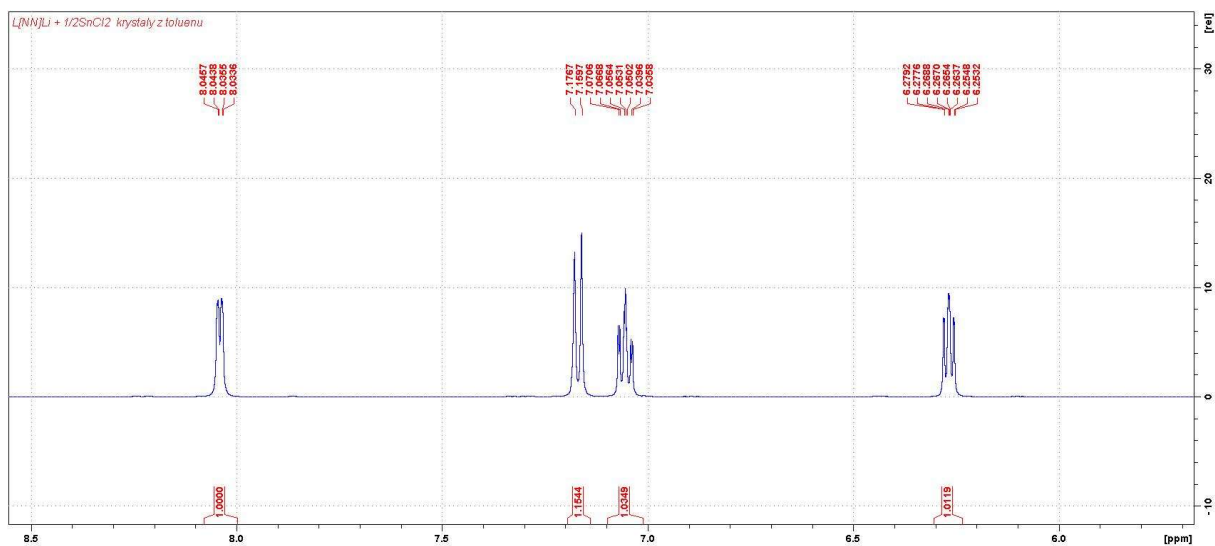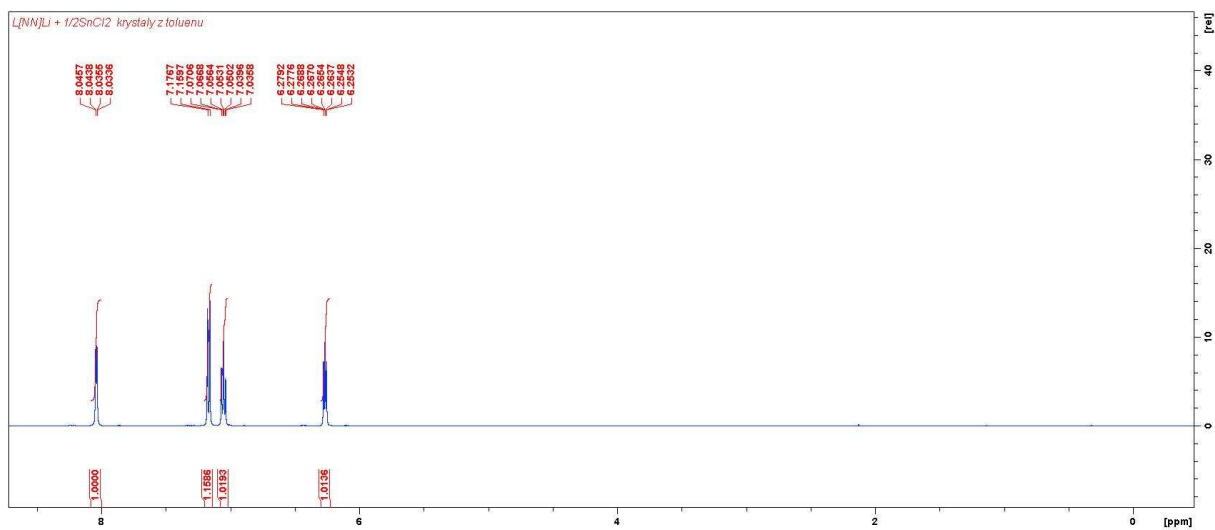

Figure S13: <sup>1</sup>H NMR spectrum of **7** in C<sub>6</sub>D<sub>6</sub>.

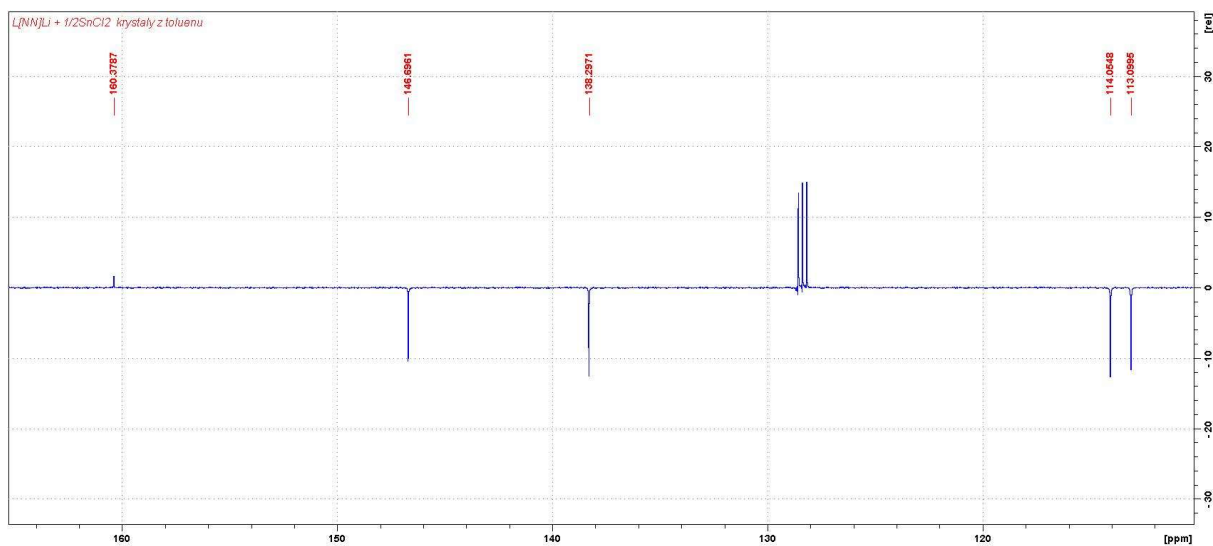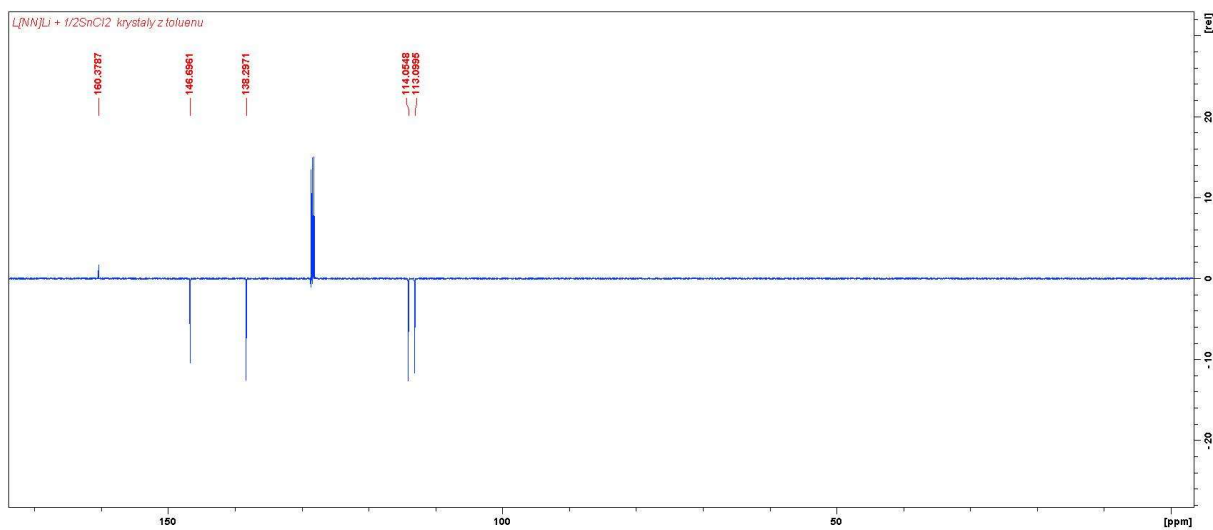

Figure S14:  $^{13}\text{C}\{^1\text{H}\}$  - APT NMR spectrum of **7** in  $\text{C}_6\text{D}_6$ .

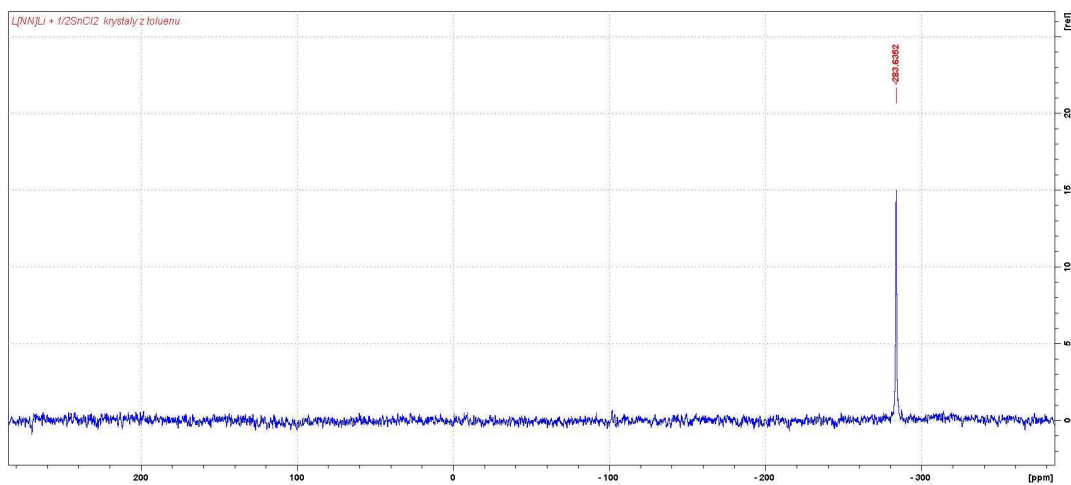

Figure S15:  $^{119}\text{Sn}\{^1\text{H}\}$  NMR spectrum of **7** in  $\text{C}_6\text{D}_6$ .

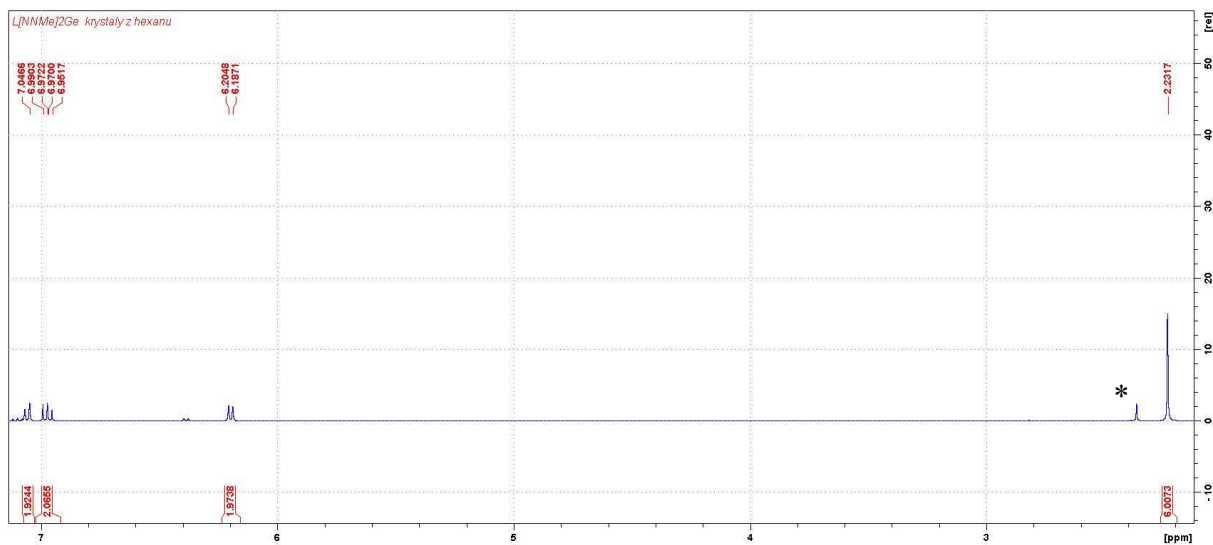

Figure S16:  $^1\text{H}$  NMR spectrum of **8** in  $\text{C}_6\text{D}_6$  (\*unknown impurity).

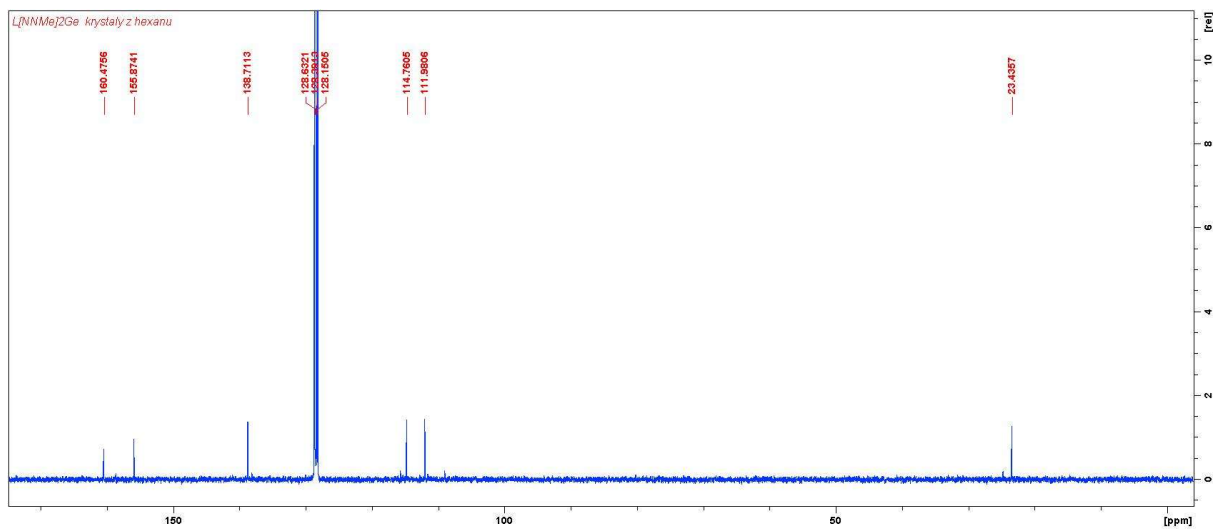

Figure S17:  $^{13}\text{C}\{^1\text{H}\}$  NMR spectrum of **8** in  $\text{C}_6\text{D}_6$ .

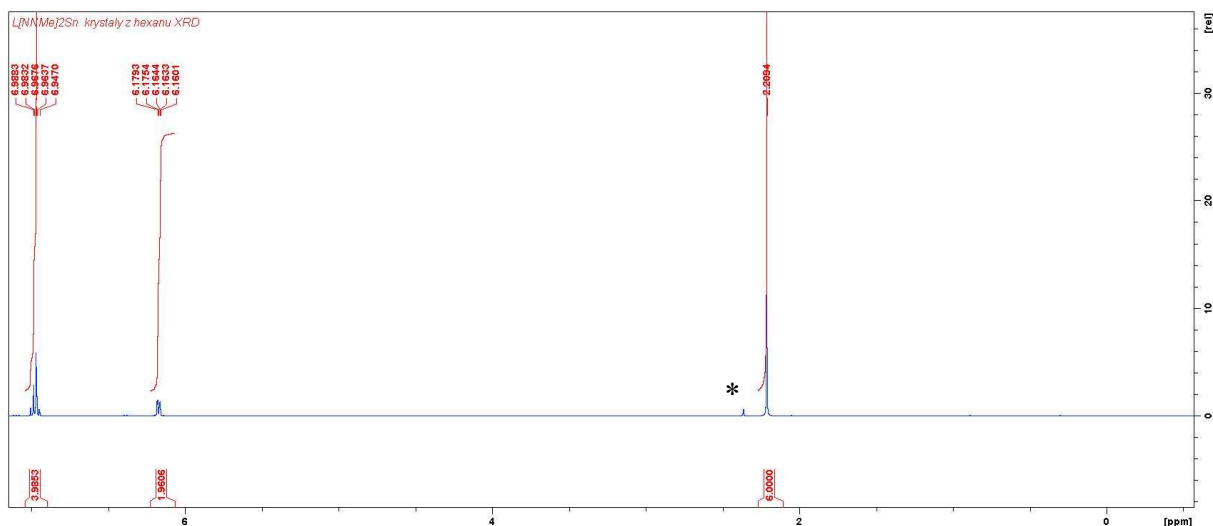

**Figure S18:**  $^1\text{H}$  NMR spectrum of **9** in  $\text{C}_6\text{D}_6$  (\*unknown impurity).

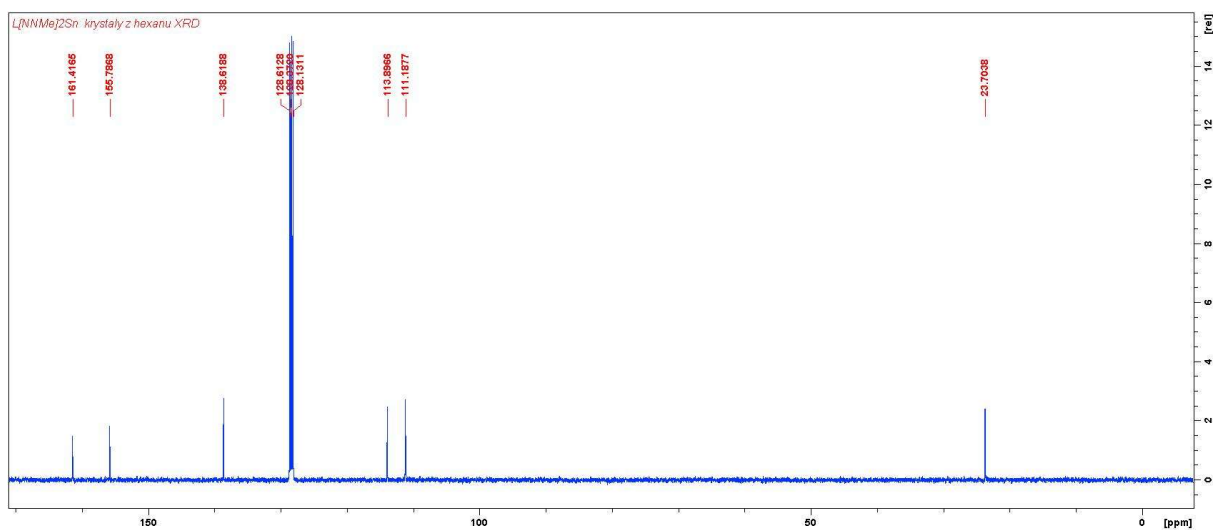

**Figure S19:**  $^{13}\text{C}\{^1\text{H}\}$  NMR spectrum of **9** in  $\text{C}_6\text{D}_6$ .

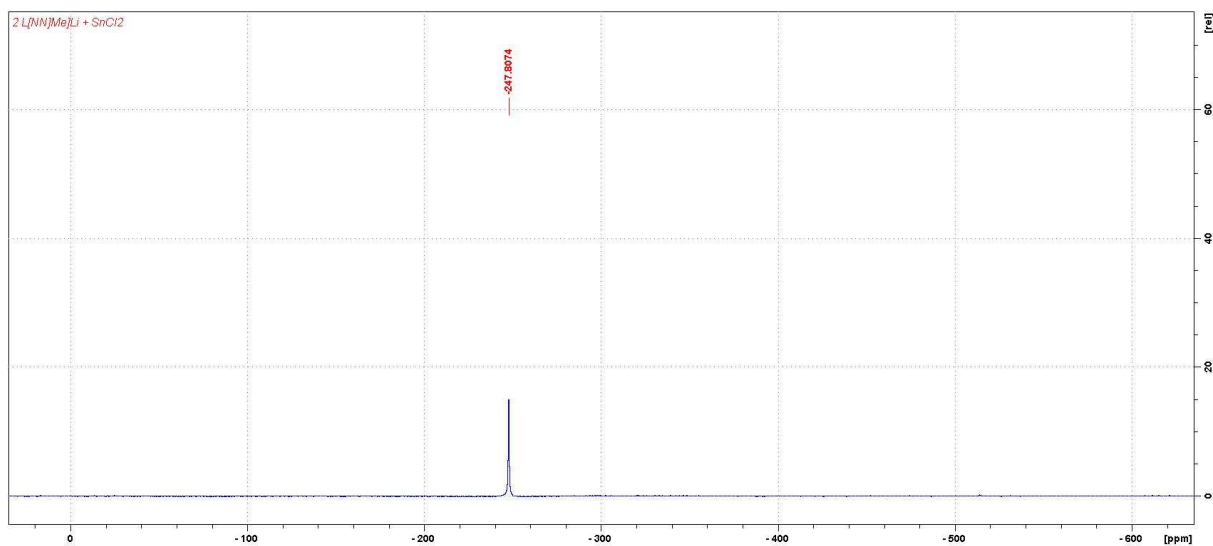

**Figure S20:**  $^{119}\text{Sn}\{^1\text{H}\}$  NMR spectrum of **9** in  $\text{C}_6\text{D}_6$ .

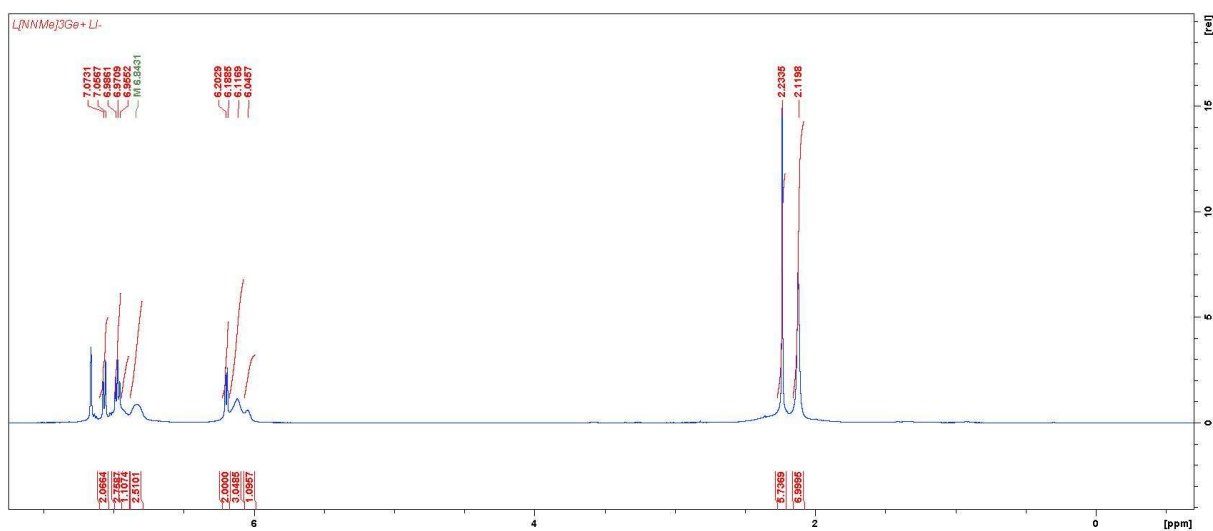

**Figure S21:**  $^1\text{H}$  NMR spectrum of **10** in  $\text{C}_6\text{D}_6$ .

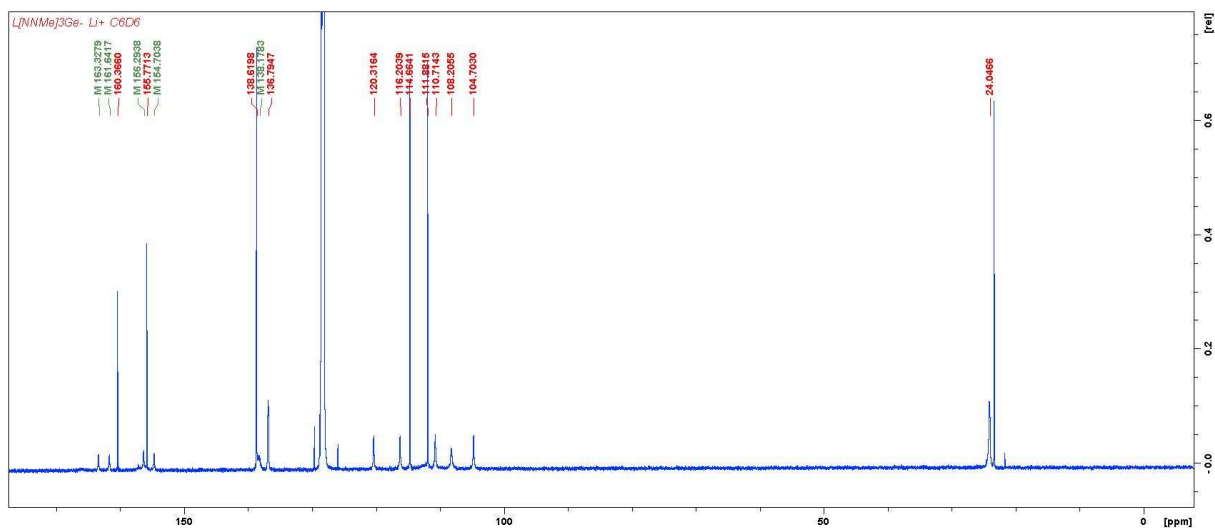

**Figure S22:**  $^{13}\text{C}\{^1\text{H}\}$  NMR spectrum of **10** in  $\text{C}_6\text{D}_6$ .

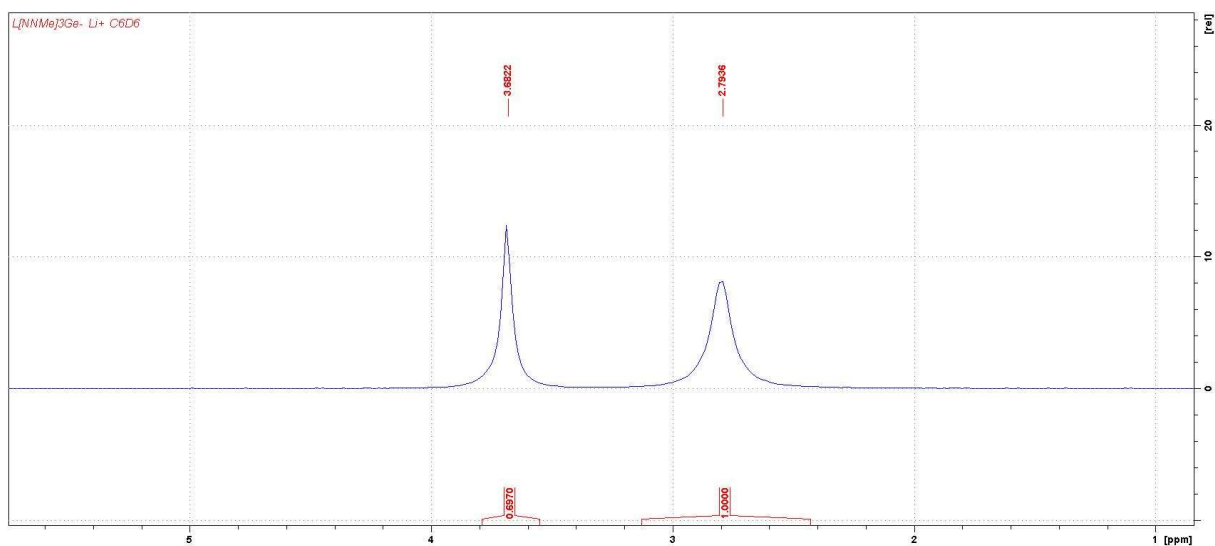

**Figure S23:**  $^7\text{Li}\{^1\text{H}\}$  NMR spectrum of **10** in  $\text{C}_6\text{D}_6$ .

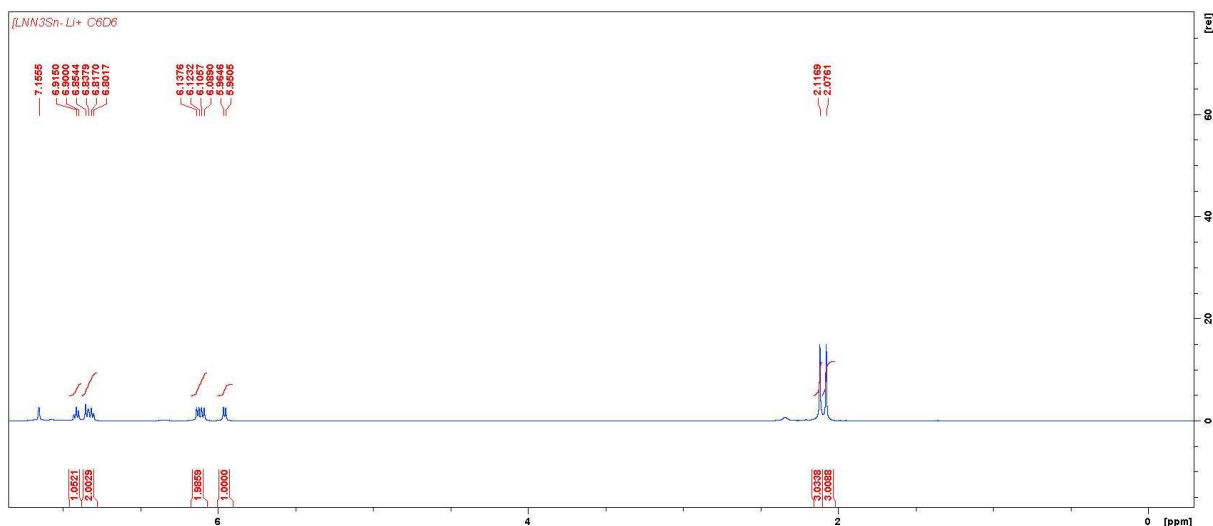

Figure S24:  $^1\text{H}$  NMR spectrum of **11** in  $\text{C}_6\text{D}_6$ .

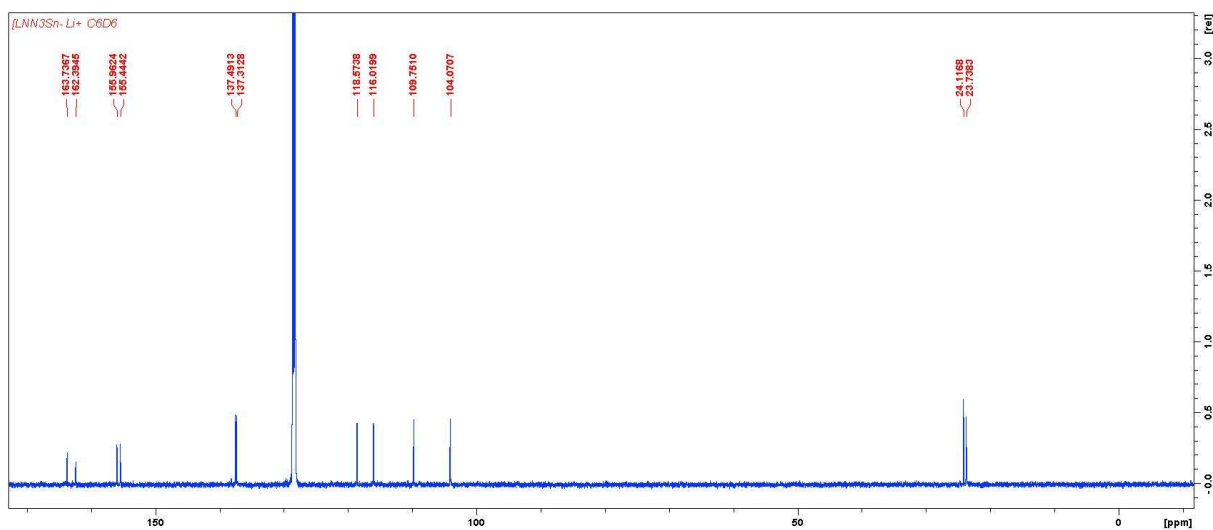

Figure S25:  $^{13}\text{C}\{^1\text{H}\}$  NMR spectrum of **11** in  $\text{C}_6\text{D}_6$ .



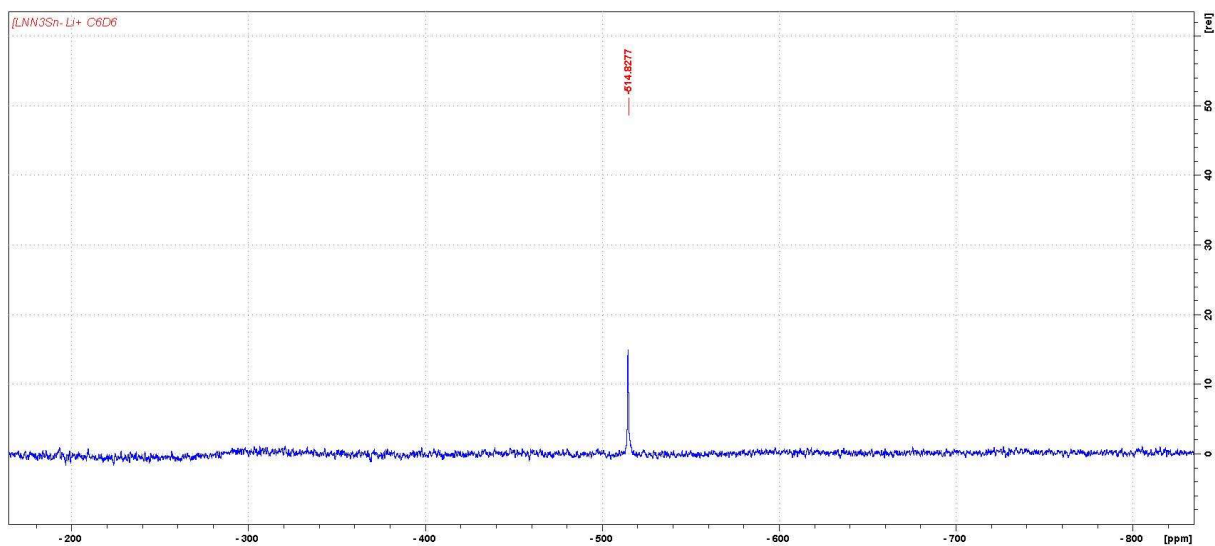

**Figure S26:**  $^{119}\text{Sn}\{^1\text{H}\}$  NMR spectrum of **11** in  $\text{C}_6\text{D}_6$ .

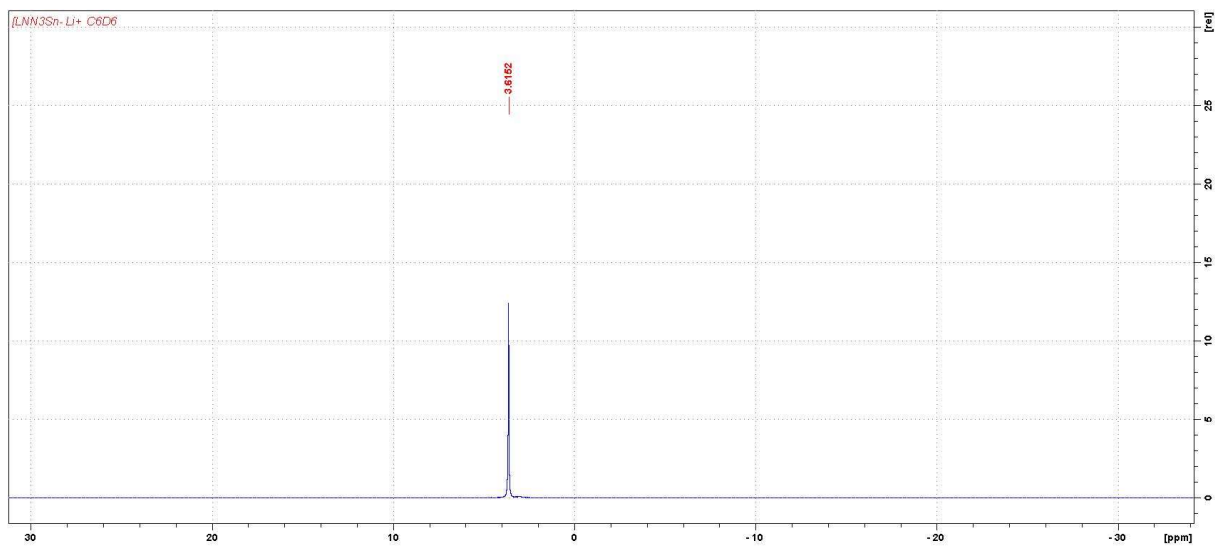

**Figure S27:**  $^7\text{Li}\{^1\text{H}\}$  NMR spectrum of **11** in  $\text{C}_6\text{D}_6$ .

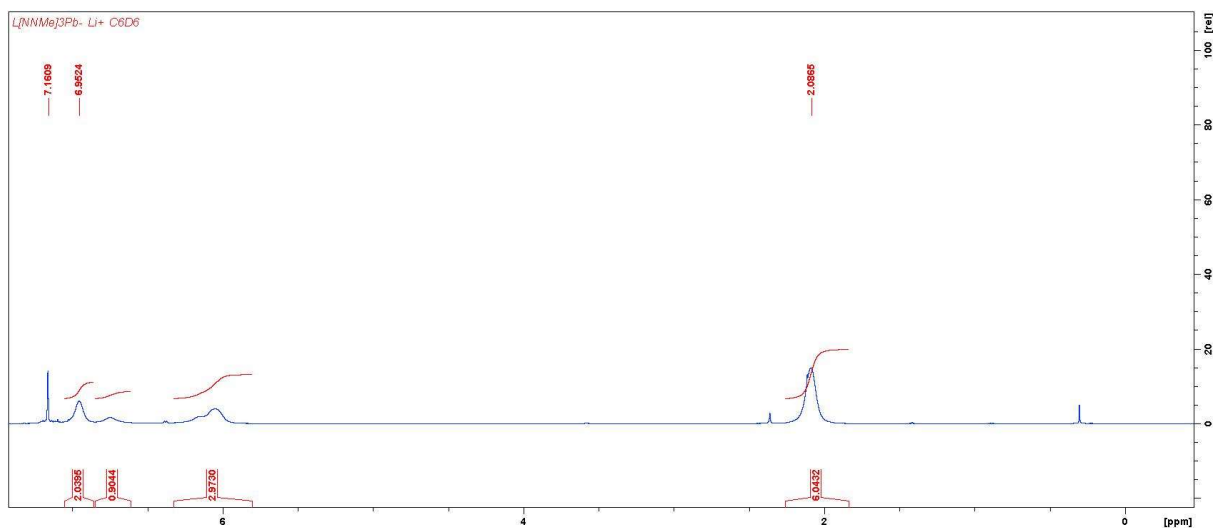

**Figure S28:**  $^1\text{H}$  NMR spectrum of **12** in  $\text{C}_6\text{D}_6$ .

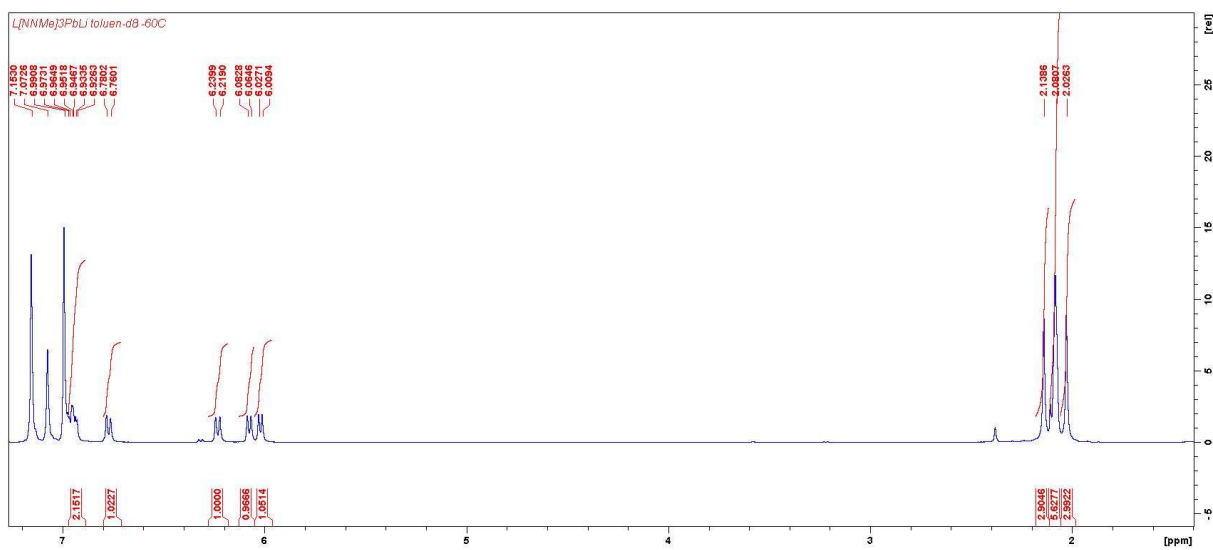

**Figure S29:**  $^1\text{H}$  NMR spectrum of **12** in toluene- $d_8$   $-60^\circ\text{C}$ .

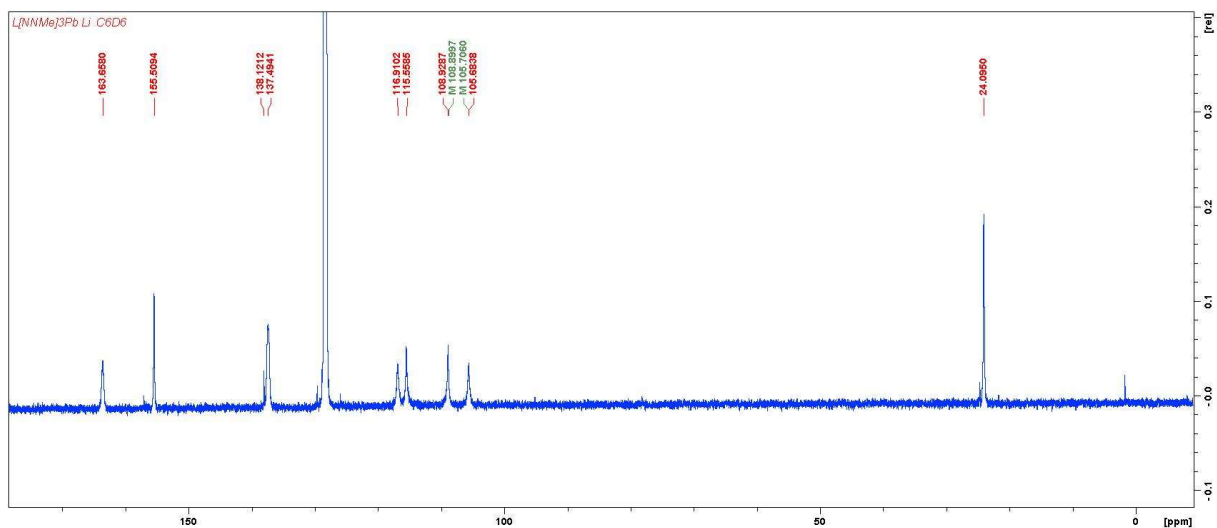

**Figure S30:**  $^{13}\text{C}\{^1\text{H}\}$  NMR spectrum of **12** in  $\text{C}_6\text{D}_6$ .

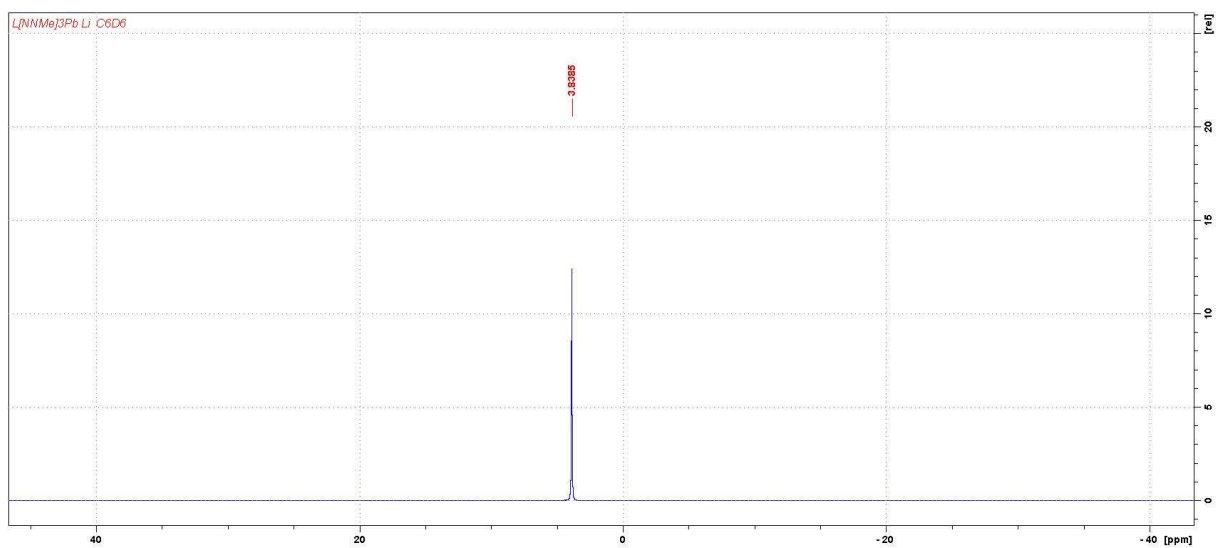

**Figure S31:**  $^7\text{Li}\{^1\text{H}\}$  NMR spectrum of **12** in  $\text{C}_6\text{D}_6$ .

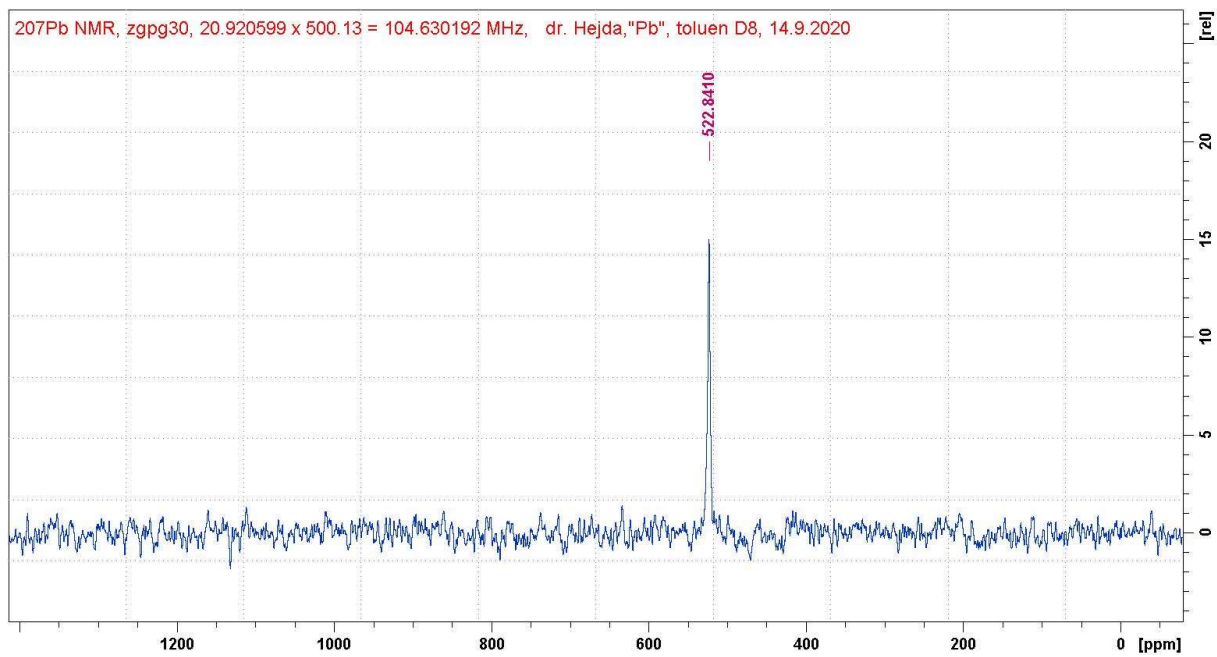

**Figure S32:**  $^{207}\text{Pb}\{^1\text{H}\}$  NMR spectrum of **12** in  $\text{C}_6\text{D}_6$ .

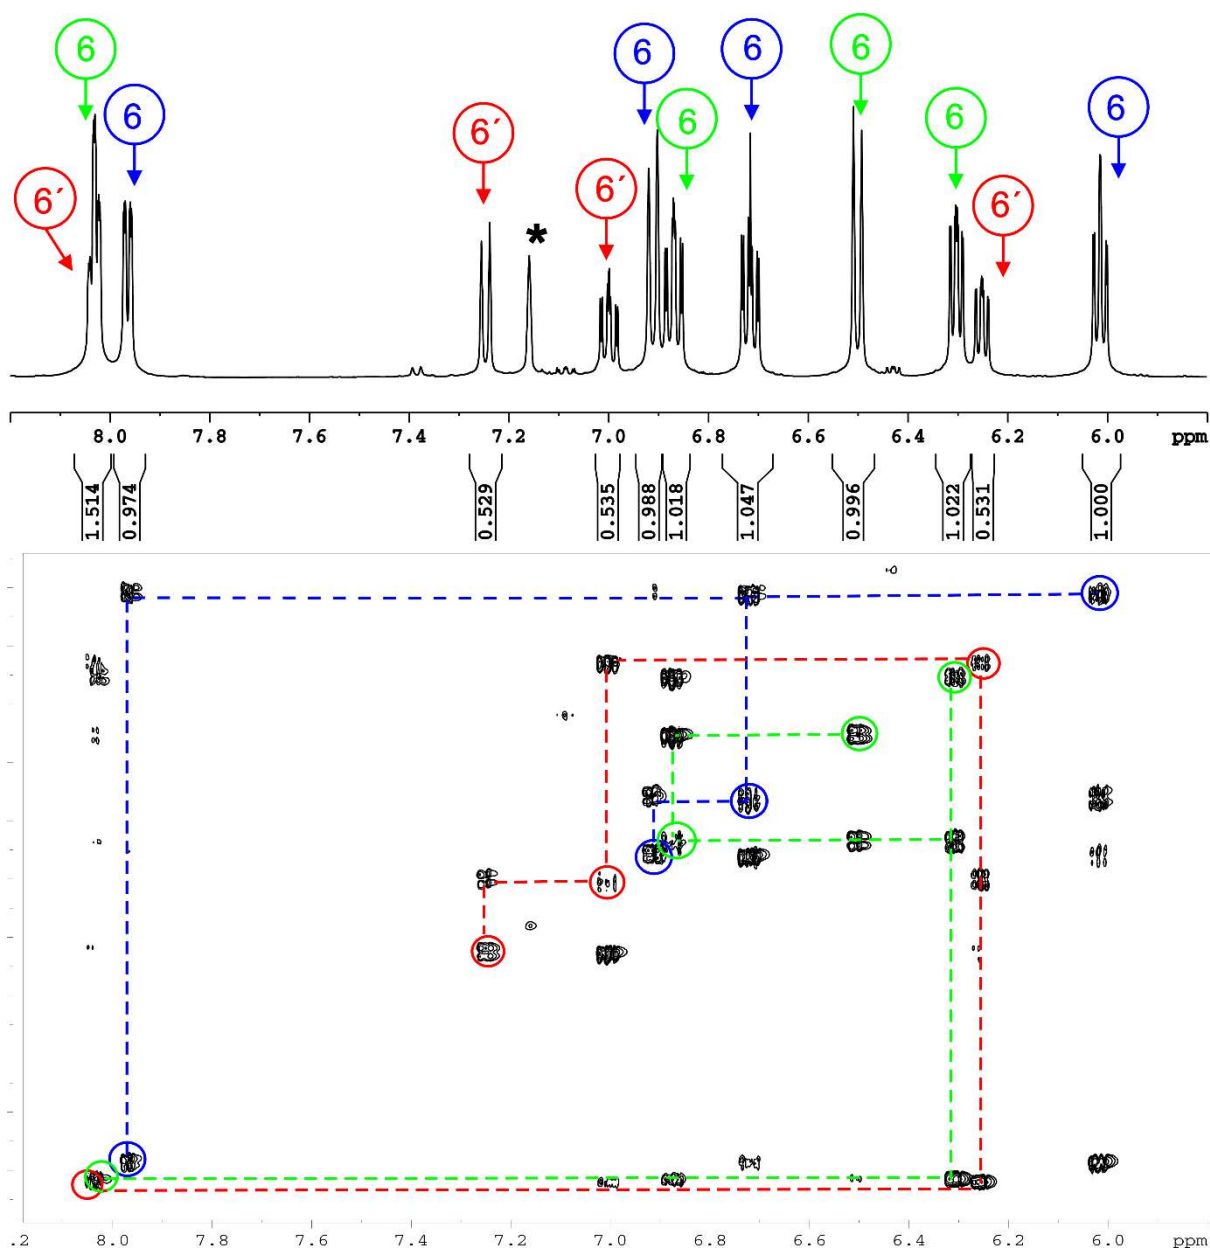

**Figure S33:**  $^1\text{H}$ ,  $^1\text{H}$  COSY NMR spectrum of **6** in  $\text{C}_6\text{D}_6$  (\*) illustrating the presence of two isomers **6** and  $\mathbf{6'}$  in solution at r.t.

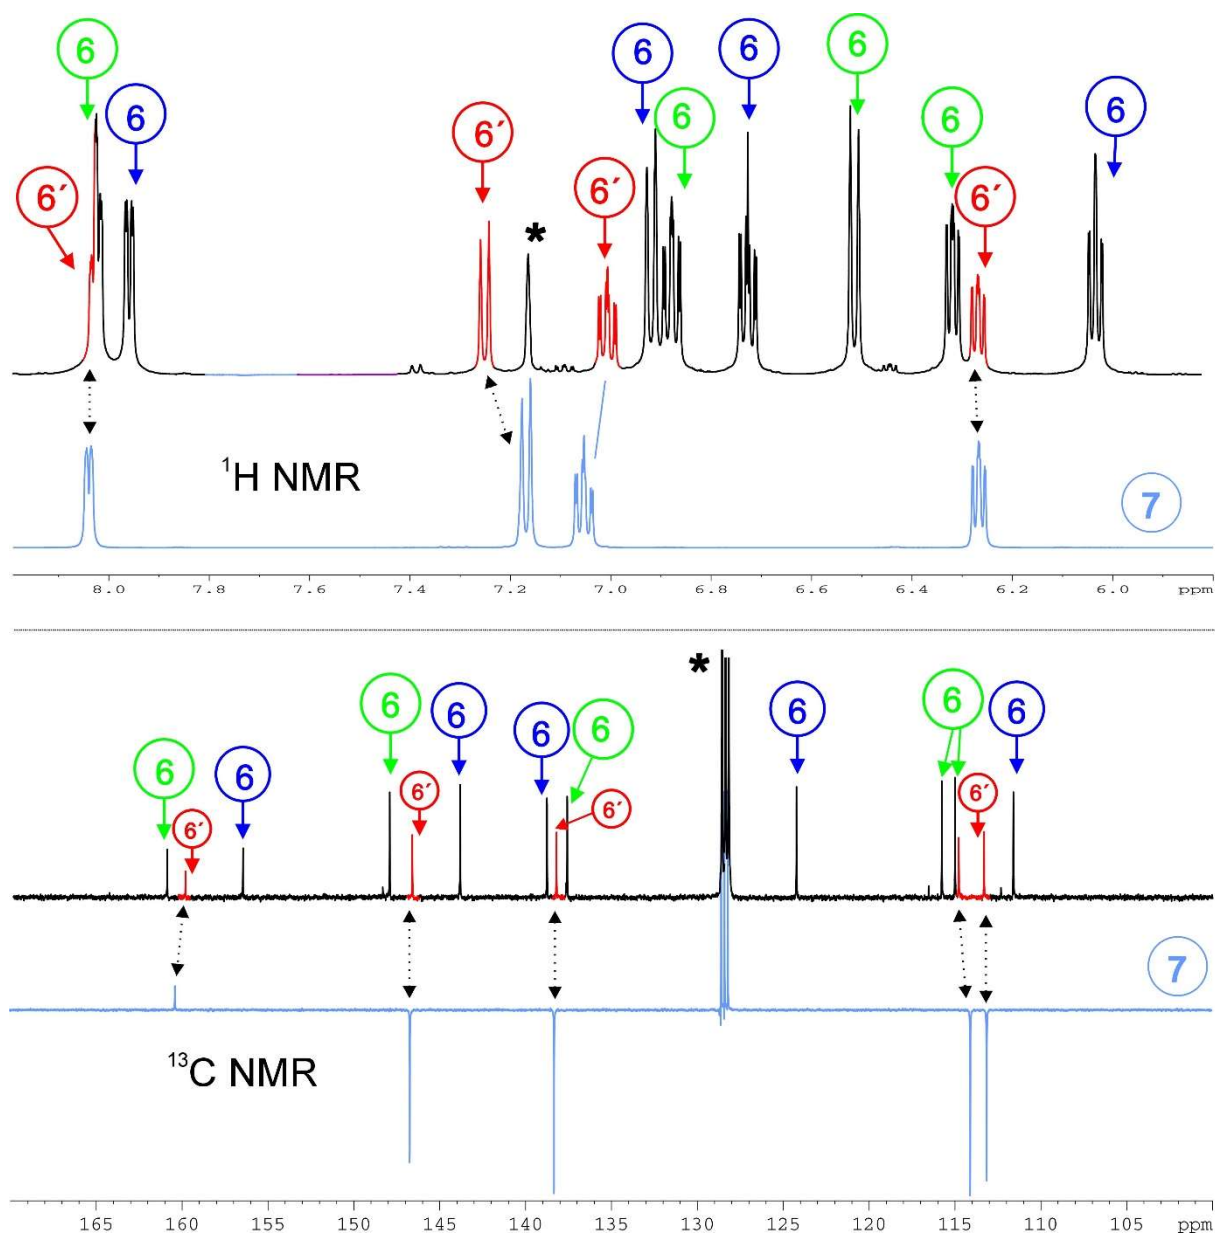

**Figure S34:** Comparison of  $^1\text{H}$  and  $^{13}\text{C}\{^1\text{H}\}$  NMR spectra stannylene **7** and mixture of two isomers germylene **6** and **6'** in  $\text{C}_6\text{D}_6$  (\*) showing a close resemblance between **7** and **6'**.

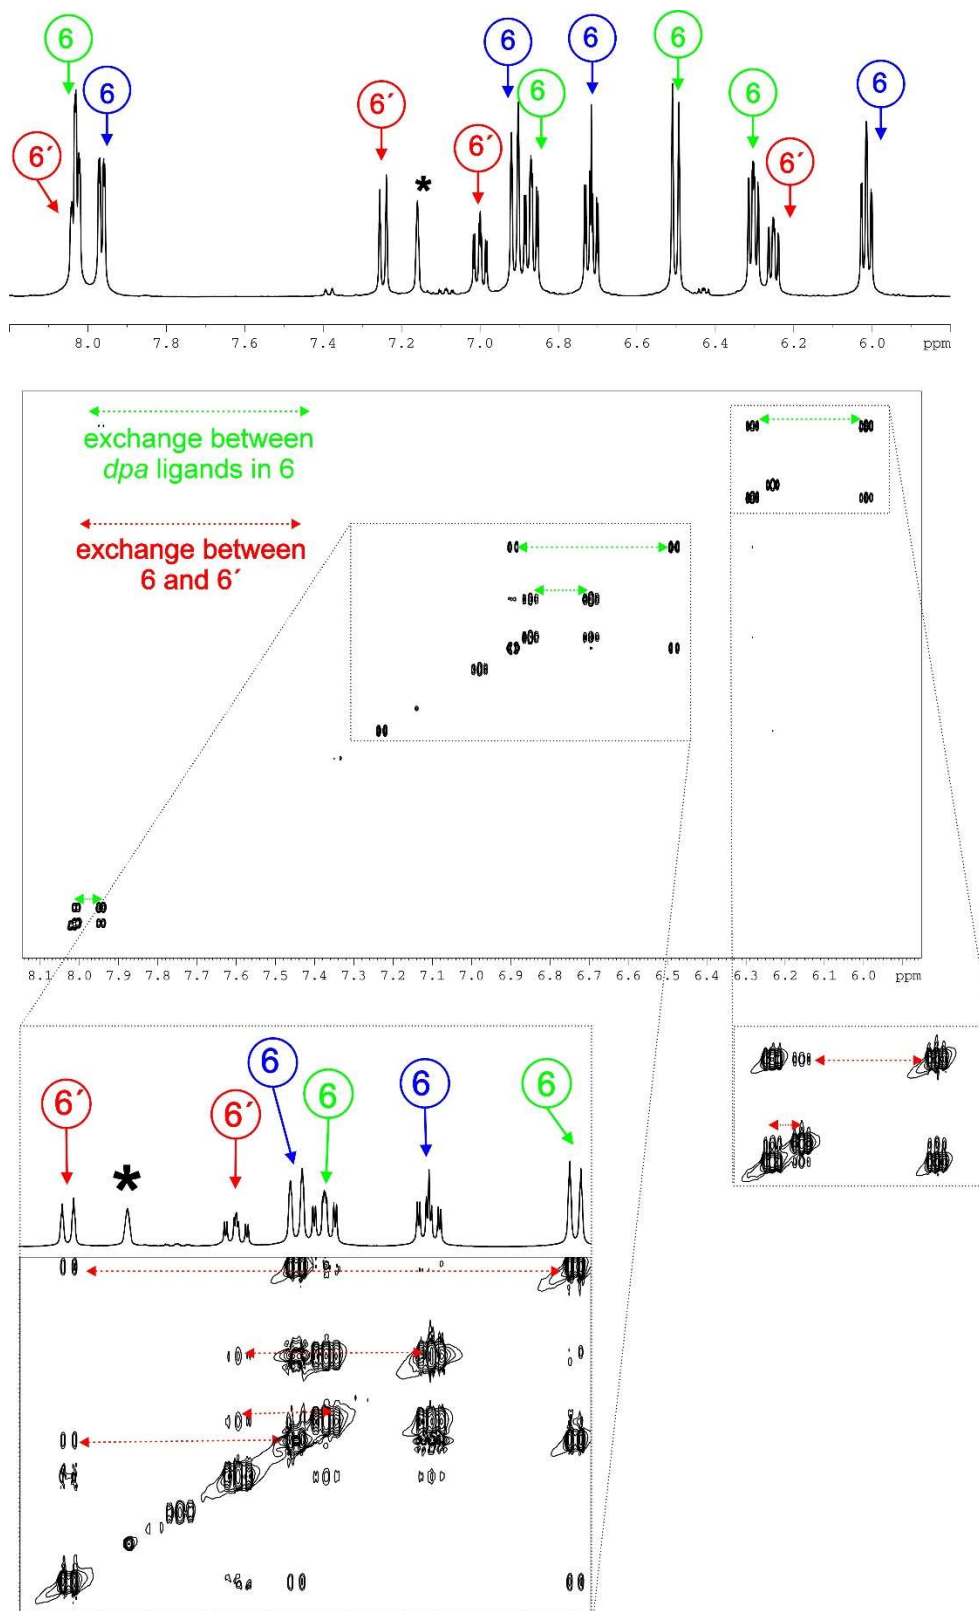

**Figure S35:**  $^1H$ ,  $^1H$  EXSY NMR spectrum of of **6** in  $C_6D_6$  (\*) showing a mutual dynamic exchange between both *dpa* ligands in **6** (green) and their exchange with the proposed second isomer  $6'$  (red). Note that all marked cross-peaks are in the same phase as the diagonal peaks.

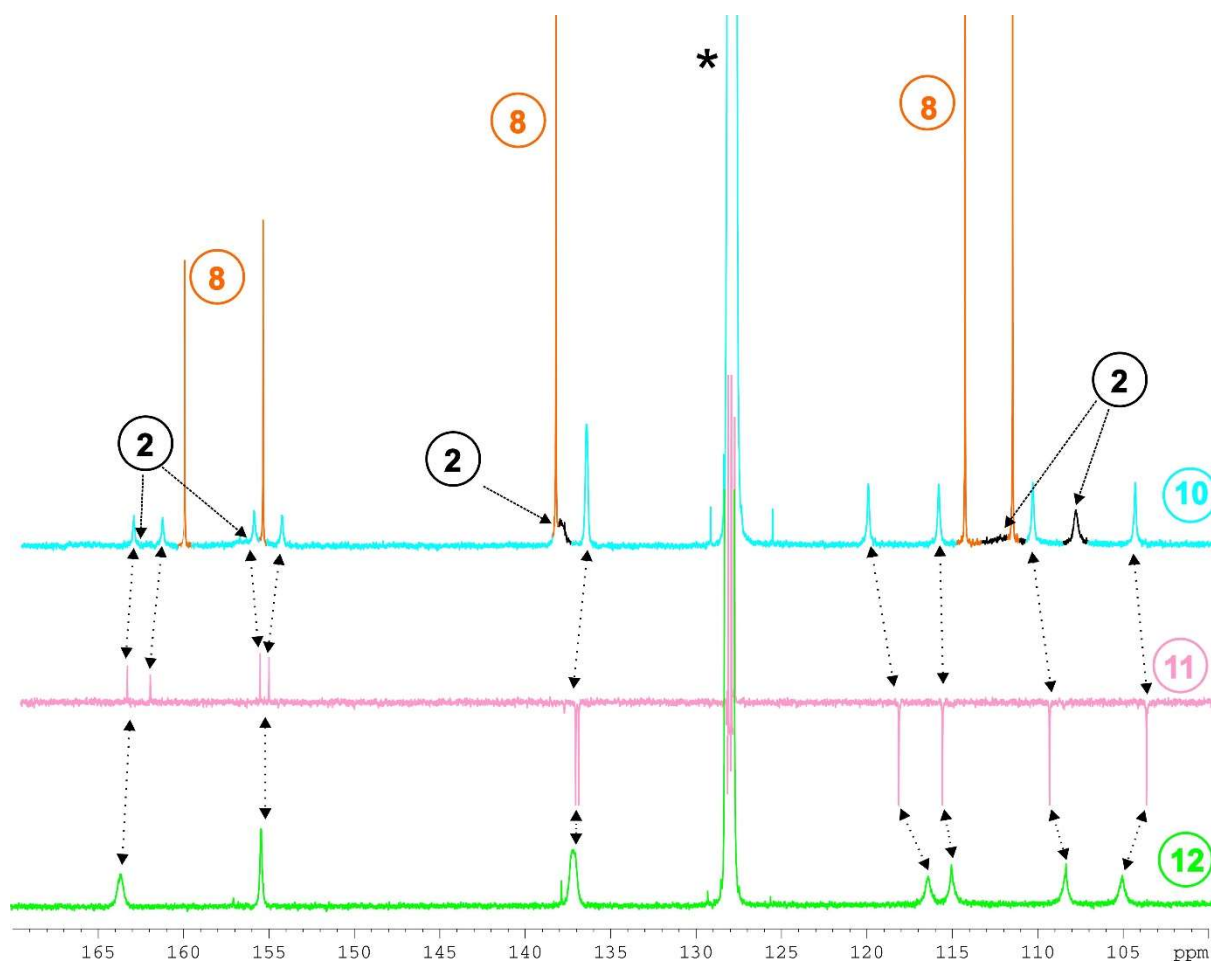

**Figure S36:** Comparison of  $^{13}\text{C}\{^1\text{H}\}$  NMR spectra of **10-12** in  $\text{C}_6\text{D}_6$  (\*) showing a mutual resemblance between **10 - 12** (in the case of **12** some resonances seem to be overlapped). Furthermore, a mixture obtained upon dissolution of single crystals of **10** (top) containing besides signals of **10** those of germylene **8** and lithium derivative **2** as a result of partial decomposition of **10** in solution. Please note that some signals of **2** are not resolved due their significant broadening, please see also  $^{13}\text{C}\{^1\text{H}\}$  NMR spectrum of isolated **2** showing a very broaden resonances (Figure S2).



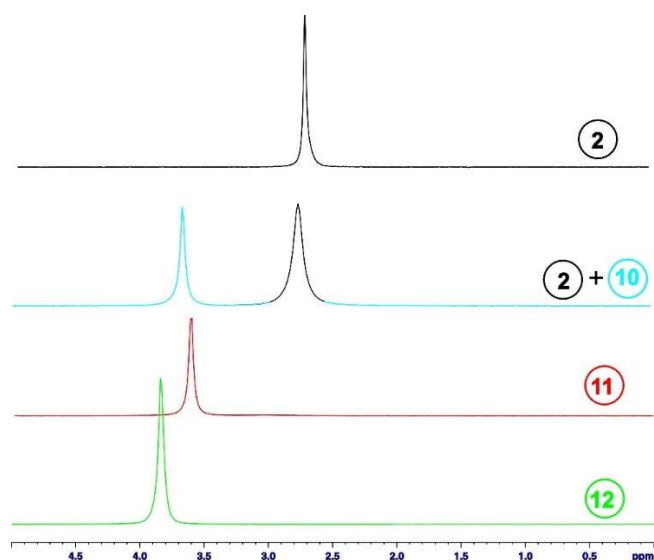

**Figure S37:** Comparison of  ${}^7\text{Li}\{^1\text{H}\}$  NMR spectra of **10-12** in  $\text{C}_6\text{D}_6$  (\*) showing a mutual resemblance between **11** and **12**. Furthermore, a mixture of two components obtained upon dissolution of single crystals of **10** containing besides signals of **10** that of the lithium derivative **2** as a result of partial decomposition of **10** in solution is presented. The  ${}^7\text{Li}\{^1\text{H}\}$  NMR spectrum of pure **2** is also included.

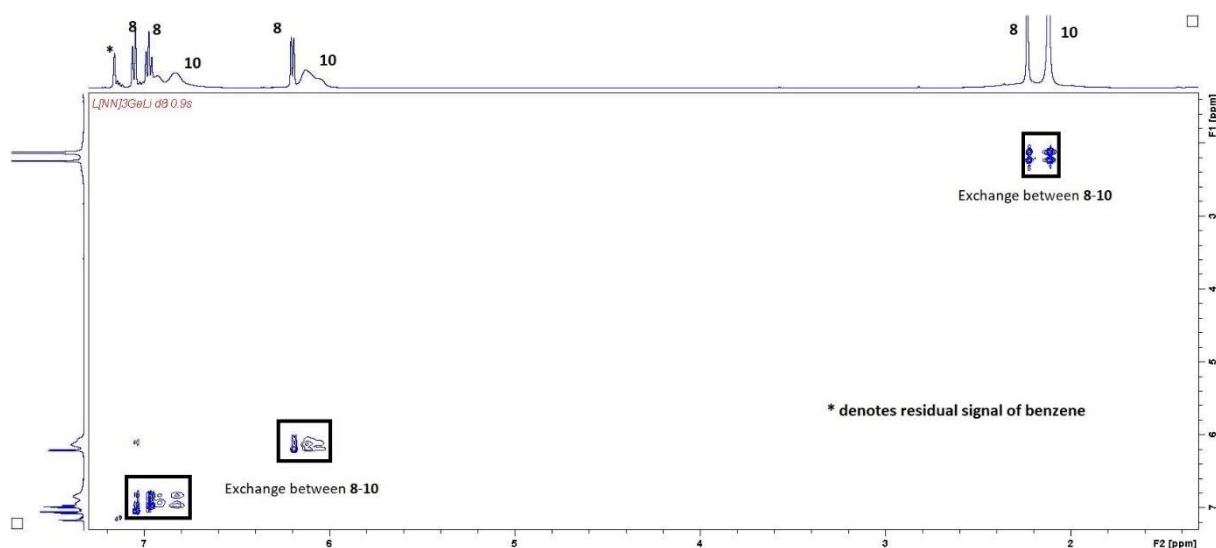

**Figure S38:**  ${}^1\text{H}$ ,  ${}^1\text{H}$  EXSY NMR spectrum of dissolved single crystals of **10** in  $\text{C}_6\text{D}_6$  (\*) showing a mutual dynamic exchange between **10** (blue) and the germylene **8** (orange). The exchange with the lithium complex **2** is not resolved probably due a significant broadening of the signals. Note that all marked cross-peaks are in the same phase as the diagonal peaks.

## 2. Crystallographic data.

**Table S1.** Crystal data and structure refinement of studied compounds.

|                                                                                     | <b>2</b>                                                        | <b>3</b>                                          | <b>4</b>                                                                       |
|-------------------------------------------------------------------------------------|-----------------------------------------------------------------|---------------------------------------------------|--------------------------------------------------------------------------------|
| Formula                                                                             | C <sub>48</sub> H <sub>48</sub> Li <sub>4</sub> N <sub>12</sub> | C <sub>10</sub> H <sub>8</sub> ClGeN <sub>3</sub> | C <sub>20</sub> H <sub>16</sub> Cl <sub>2</sub> N <sub>6</sub> Sn <sub>2</sub> |
| Formula weight, g mol <sup>-1</sup>                                                 | 662.28                                                          | 278.23                                            | 648.67                                                                         |
| Crystal system                                                                      | Triclinic                                                       | Triclinic                                         | Orthorhombic                                                                   |
| Crystal size, mm                                                                    | 0.44 × 0.25 × 0.13                                              | 0.59 × 0.38 × 0.20                                | 0.20 × 0.19 × 0.16                                                             |
| Space group                                                                         | P-1                                                             | P-1                                               | Pca2 <sub>1</sub>                                                              |
| <i>a</i> , Å                                                                        | 11.1572(4)                                                      | 8.2653(5)                                         | 17.1415(8)                                                                     |
| <i>b</i> , Å                                                                        | 11.5648(4)                                                      | 9.9478(6)                                         | 8.3019(4)                                                                      |
| <i>c</i> , Å                                                                        | 19.6657(7)                                                      | 12.6110(7)                                        | 14.9727(6)                                                                     |
| $\alpha$ , °                                                                        | 79.294(2)                                                       | 91.910(3)                                         | 90                                                                             |
| $\beta$ , °                                                                         | 76.670(2)                                                       | 92.733(3)                                         | 90                                                                             |
| $\gamma$ , °                                                                        | 62.192(2)                                                       | 91.899(3)                                         | 90                                                                             |
| <i>V</i> , Å <sup>3</sup>                                                           | 2174.94(14)                                                     | 1034.51(11)                                       | 2130.72(11)                                                                    |
| <i>Z</i>                                                                            | 2                                                               | 4                                                 | 4                                                                              |
| $\rho_{\text{calcd}}$ , Mg m <sup>-3</sup>                                          | 1.253                                                           | 1.982                                             | 2.022                                                                          |
| $\mu$ (Mo <i>K</i> $\alpha$ ), mm <sup>-1</sup>                                     | 0.593                                                           | 3.185                                             | 2.616                                                                          |
| <i>F</i> (000)                                                                      | 864                                                             | 552                                               | 1248                                                                           |
| $\theta$ range, deg                                                                 | 1 to 27.5                                                       | 1 to 27.5                                         | 1 to 27.5                                                                      |
| No. of reflns collected                                                             | 52110                                                           | 30605                                             | 19086                                                                          |
| No. indep. Reflns                                                                   | 9155                                                            | 4750                                              | 4850                                                                           |
| No. obsd reflns with ( <i>I</i> > 2 $\sigma$ ( <i>I</i> )), <i>R</i> <sub>int</sub> | 4900, 0.1578                                                    | 3956, 0.037                                       | 3907, 0.60                                                                     |
| No. refined params                                                                  | 586                                                             | 271                                               | 272                                                                            |
| GooF ( <i>F</i> <sup>2</sup> )                                                      | 1.297                                                           | 1.025                                             | 1.027                                                                          |
| <i>R</i> <sub>1</sub> ( <i>F</i> ) ( <i>I</i> > 2 $\sigma$ ( <i>I</i> ))            | 0.1095                                                          | 0.0295                                            | 0.0373                                                                         |
| <i>wR</i> <sub>2</sub> ( <i>F</i> <sup>2</sup> ) (all data)                         | 0.2443                                                          | 0.0676                                            | 0.0793                                                                         |
| Largest diff peak/hole, e Å <sup>-3</sup>                                           | 0.648 / -0.691                                                  | 0.693 / -0.679                                    | 2.453 / -0.901                                                                 |
| CCDC                                                                                | 2032982                                                         | 2032974                                           | 2032973                                                                        |

$$R_{\text{int}} = \frac{\sum |F_o^2 - F_{o,\text{mean}}^2|}{\sum F_o^2}, S = \left[ \frac{\sum (w(F_o^2 - F_c^2)^2)}{(N_{\text{diffrs}} - N_{\text{params}})} \right]^{1/2} \text{ for all data, } R(F) = \frac{\sum ||F_o| - |F_c||}{\sum |F_o|} \text{ for observed data, } wR(F^2) = \left[ \frac{\sum (w(F_o^2 - F_c^2)^2)}{(\sum w(F_o^2)^2)} \right]^{1/2} \text{ for all data.}$$

**Table S1 (continuation).** Crystal data and structure refinement of studied compounds.

|                                                                                     | <b>5</b>                                           | <b>6</b>                                         | <b>7</b>                                          |
|-------------------------------------------------------------------------------------|----------------------------------------------------|--------------------------------------------------|---------------------------------------------------|
| Formula                                                                             | C <sub>12</sub> H <sub>12</sub> ClGeN <sub>3</sub> | C <sub>20</sub> H <sub>16</sub> GeN <sub>6</sub> | C <sub>20</sub> H <sub>16</sub> N <sub>6</sub> Sn |
| Formula weight, g mol <sup>-1</sup>                                                 | 306.29                                             | 412.98                                           | 459.08                                            |
| Crystal system                                                                      | Monoclinic                                         | Orthorhombic                                     | Monoclinic                                        |
| Crystal size, mm                                                                    | 0.59 × 0.39 × 0.38                                 | 0.37 × 0.29 × 0.22                               | 0.59 × 0.57 × 0.16                                |
| Space group                                                                         | P2 <sub>1</sub> /c                                 | Pbca                                             | P2 <sub>1</sub> /n                                |
| <i>a</i> , Å                                                                        | 7.9626(5)                                          | 7.7879(4)                                        | 11.8487(6)                                        |
| <i>b</i> , Å                                                                        | 9.3447(5)                                          | 18.4219(11)                                      | 9.2747(4)                                         |
| <i>c</i> , Å                                                                        | 17.4878(10)                                        | 24.4619(12)                                      | 16.9821(9)                                        |
| $\alpha$ , °                                                                        | 90                                                 | 90                                               | 90                                                |
| $\beta$ , °                                                                         | 95.358(2)                                          | 90                                               | 104.129(2)                                        |
| $\gamma$ , °                                                                        | 90                                                 | 90                                               | 90                                                |
| <i>V</i> , Å <sup>3</sup>                                                           | 1295.55(13)                                        | 3509.5(3)                                        | 1809.76(15)                                       |
| <i>Z</i>                                                                            | 4                                                  | 8                                                | 4                                                 |
| $\rho_{\text{calcd}}$ , Mg m <sup>-3</sup>                                          | 1.570                                              | 1.563                                            | 2.022                                             |
| $\mu$ (Mo <i>K</i> $\alpha$ ), mm <sup>-1</sup>                                     | 2.551                                              | 1.764                                            | 1.429                                             |
| <i>F</i> (000)                                                                      | 616                                                | 1680                                             | 912                                               |
| $\theta$ range, deg                                                                 | 1 to 27.5                                          | 1 to 27.5                                        | 1 to 27.5                                         |
| No. of reflns collected                                                             | 33637                                              | 31981                                            | 38955                                             |
| No. indep. Reflns                                                                   | 2972                                               | 4018                                             | 4154                                              |
| No. obsd reflns with ( <i>I</i> > 2 $\sigma$ ( <i>I</i> )), <i>R</i> <sub>int</sub> | 2561, 0.0296                                       | 2848, 0.058                                      | 3733, 0.017                                       |
| No. refined params                                                                  | 156                                                | 244                                              | 244                                               |
| Goof ( <i>F</i> <sup>2</sup> )                                                      | 1.086                                              | 1.057                                            | 1.147                                             |
| <i>R</i> <sub>1</sub> ( <i>F</i> ) ( <i>I</i> > 2 $\sigma$ ( <i>I</i> ))            | 0.0301                                             | 0.0473                                           | 0.0226                                            |
| <i>wR</i> <sub>2</sub> ( <i>F</i> <sup>2</sup> ) (all data)                         | 0.0607                                             | 0.0740                                           | 0.0530                                            |
| Largest diff peak/hole, e Å <sup>-3</sup>                                           | 0.377 / -0.372                                     | 0.392 / -0.489                                   | 0.370 / -0.651                                    |
| CCDC                                                                                | 2032978                                            | 2032972                                          | 2032975                                           |

$$R_{\text{int}} = \frac{\sum |F_o^2 - F_{o,\text{mean}}^2|}{\sum F_o^2}, S = \left[ \frac{\sum (w(F_o^2 - F_c^2)^2)}{(N_{\text{diffrs}} - N_{\text{params}})} \right]^{1/2} \text{ for all data, } R(F) = \frac{\sum ||F_o| - |F_c||}{\sum |F_o|} \text{ for observed data, } wR(F^2) = \left[ \frac{\sum (w(F_o^2 - F_c^2)^2)}{(\sum w(F_o^2)^2)} \right]^{1/2} \text{ for all data.}$$

**Table S1 (continuation).** Crystal data and structure refinement of studied compounds.

|                                                                                     | <b>8</b>                                         | <b>9</b>                                          | <b>10</b>                                          |
|-------------------------------------------------------------------------------------|--------------------------------------------------|---------------------------------------------------|----------------------------------------------------|
| Formula                                                                             | C <sub>24</sub> H <sub>24</sub> GeN <sub>6</sub> | C <sub>24</sub> H <sub>24</sub> N <sub>6</sub> Sn | C <sub>36</sub> H <sub>36</sub> GeLiN <sub>9</sub> |
| Formula weight, g mol <sup>-1</sup>                                                 | 469.08                                           | 515.18                                            | 674.27                                             |
| Crystal system                                                                      | Triclinic                                        | Monoclinic                                        | trigonal                                           |
| Crystal size, mm                                                                    | 0.59 × 0.57 × 0.23                               | 0.59 × 0.34 × 0.28                                | 0.59 × 0.59 × 0.48                                 |
| Space group                                                                         | P-1                                              | P2 <sub>1</sub> /c                                | R3c                                                |
| <i>a</i> , Å                                                                        | 8.8339(5)                                        | 11.4993(5)                                        | 12.0085(9)                                         |
| <i>b</i> , Å                                                                        | 12.1659(6)                                       | 21.1590(8)                                        | 12.0085(9)                                         |
| <i>c</i> , Å                                                                        | 12.3964(6)                                       | 9.1723(4)                                         | 41.775(3)                                          |
| $\alpha$ , °                                                                        | 111.554(2)                                       | 90                                                | 90                                                 |
| $\beta$ , °                                                                         | 96.379(2)                                        | 92.591(2)                                         | 90                                                 |
| $\gamma$ , °                                                                        | 110.358(2)                                       | 90                                                | 120                                                |
| <i>V</i> , Å <sup>3</sup>                                                           | 1117.25(10)                                      | 2229.46(16)                                       | 5217.0(9)                                          |
| <i>Z</i>                                                                            | 2                                                | 4                                                 | 6                                                  |
| $\rho_{\text{calcd}}$ , Mg m <sup>-3</sup>                                          | 1.394                                            | 1.535                                             | 1.288                                              |
| $\mu$ (Mo <i>K</i> $\alpha$ ), mm <sup>-1</sup>                                     | 1.394                                            | 1.170                                             | 0.920                                              |
| <i>F</i> (000)                                                                      | 484                                              | 1040                                              | 2100                                               |
| $\theta$ range, deg                                                                 | 1 to 27.5                                        | 1 to 27.5                                         | 1 to 27.5                                          |
| No. of reflns collected                                                             | 36087                                            | 51074                                             | 18638                                              |
| No. indep. Reflns                                                                   | 5147                                             | 5118                                              | 3418                                               |
| No. obsd reflns with ( <i>I</i> > 2 $\sigma$ ( <i>I</i> )), <i>R</i> <sub>int</sub> | 4703, 0.024                                      | 4672, 0.016                                       | 2917, 0.036                                        |
| No. refined params                                                                  | 284                                              | 284                                               | 146                                                |
| Goof ( <i>F</i> <sup>2</sup> )                                                      | 1.035                                            | 1.138                                             | 1.039                                              |
| <i>R</i> <sub>1</sub> ( <i>F</i> ) ( <i>I</i> > 2 $\sigma$ ( <i>I</i> ))            | 0.0258                                           | 0.0225                                            | 0.0312                                             |
| <i>wR</i> <sub>2</sub> ( <i>F</i> <sup>2</sup> ) (all data)                         | 0.0644                                           | 0.0519                                            | 0.0626                                             |
| Largest diff peak/hole, e Å <sup>-3</sup>                                           | 0.272 / -0.459                                   | 0.298 / -0.613                                    | 0.208 / -0.279                                     |
| CCDC                                                                                | 2032977                                          | 2032981                                           | 2032979                                            |

$$R_{\text{int}} = \frac{\sum |F_o^2 - F_{o,\text{mean}}^2|}{\sum F_o^2}, S = \left[ \frac{\sum (w(F_o^2 - F_c^2)^2)}{(N_{\text{diffrs}} - N_{\text{params}})} \right]^{1/2} \text{ for all data, } R(F) = \frac{\sum ||F_o| - |F_c||}{\sum |F_o|} \text{ for observed data, } wR(F^2) = \left[ \frac{\sum (w(F_o^2 - F_c^2)^2)}{(\sum w(F_o^2)^2)} \right]^{1/2} \text{ for all data.}$$

**Table S1 (continuation).** Crystal data and structure refinement of studied compounds.

|                                                                                     | <b>11</b>                                           | <b>12</b>                                           |
|-------------------------------------------------------------------------------------|-----------------------------------------------------|-----------------------------------------------------|
| Formula                                                                             | C <sub>36</sub> H <sub>36</sub> LiN <sub>9</sub> Sn | C <sub>36</sub> H <sub>36</sub> LiN <sub>9</sub> Pb |
| Formula weight, g mol <sup>-1</sup>                                                 | 720.37                                              | 808.87                                              |
| Crystal system                                                                      | trigonal                                            | trigonal                                            |
| Crystal size, mm                                                                    | 0.59 × 0.52 × 0.42                                  | 0.24 × 0.23 × 0.18                                  |
| Space group                                                                         | R3c                                                 | R3c                                                 |
| <i>a</i> , Å                                                                        | 12.1177(4)                                          | 19.4667(12)                                         |
| <i>b</i> , Å                                                                        | 12.1177(4)                                          | 19.4667(12)                                         |
| <i>c</i> , Å                                                                        | 41.8064(14)                                         | 15.6860(12)                                         |
| $\alpha$ , °                                                                        | 90                                                  | 90                                                  |
| $\beta$ , °                                                                         | 90                                                  | 90                                                  |
| $\gamma$ , °                                                                        | 120                                                 | 120                                                 |
| <i>V</i> , Å <sup>3</sup>                                                           | 5316.4(12)                                          | 5147.9(7)                                           |
| <i>Z</i>                                                                            | 6                                                   | 6                                                   |
| $\rho_{\text{calcd}}$ , Mg m <sup>-3</sup>                                          | 1.350                                               | 1.565                                               |
| $\mu$ (Mo <i>K</i> $\alpha$ ), mm <sup>-1</sup>                                     | 0.759                                               | 4.955                                               |
| <i>F</i> (000)                                                                      | 2208                                                | 2400                                                |
| $\theta$ range, deg                                                                 | 1 to 27.5                                           | 1 to 27.5                                           |
| No. of reflns collected                                                             | 11757                                               | 20507                                               |
| No. indep. Reflns                                                                   | 2922                                                | 2619                                                |
| No. obsd reflns with ( <i>I</i> > 2 $\sigma$ ( <i>I</i> )), <i>R</i> <sub>int</sub> | 2405, 0.040                                         | 2295, 0.048                                         |
| No. refined params                                                                  | 146                                                 | 144                                                 |
| Goof ( <i>F</i> <sup>2</sup> )                                                      | 1.098                                               | 1.061                                               |
| <i>R</i> <sub>1</sub> ( <i>F</i> ) ( <i>I</i> > 2 $\sigma$ ( <i>I</i> ))            | 0.0288                                              | 0.0352                                              |
| <i>wR</i> <sub>2</sub> ( <i>F</i> <sup>2</sup> ) (all data)                         | 0.0592                                              | 0.0793                                              |
| Largest diff peak/hole, e Å <sup>-3</sup>                                           | 0.665 / -0.377                                      | 1.899 / -1.527                                      |
| CCDC                                                                                | 2032976                                             | 2032980                                             |

$$R_{\text{int}} = \frac{\sum |F_o^2 - F_{o,\text{mean}}^2|}{\sum F_o^2}, S = \left[ \frac{\sum (w(F_o^2 - F_c^2)^2)}{(N_{\text{diffrs}} - N_{\text{params}})} \right]^{1/2} \text{ for all data, } R(F) = \frac{\sum ||F_o| - |F_c||}{\sum |F_o|} \text{ for observed data, } wR(F^2) = \left[ \frac{\sum (w(F_o^2 - F_c^2)^2)}{(\sum w(F_o^2)^2)} \right]^{1/2} \text{ for all data.}$$

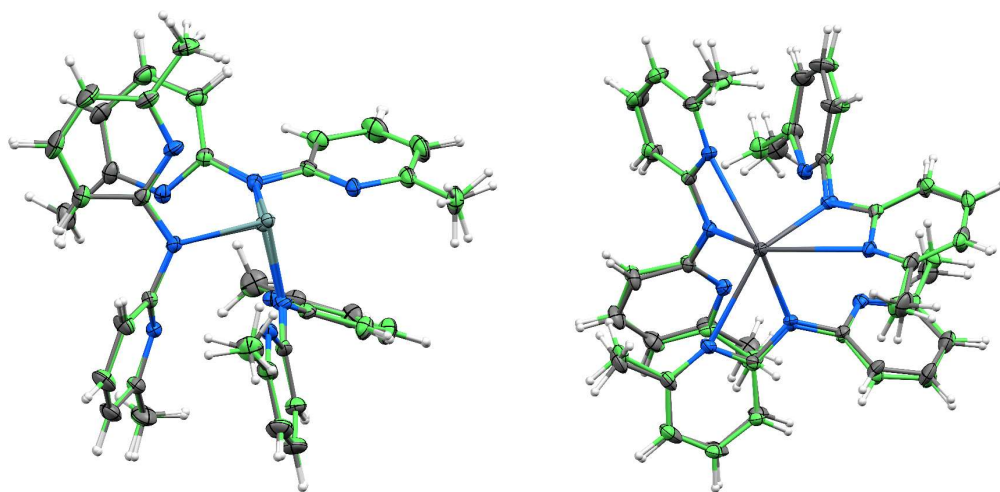

**Figure S39:** Overlay complexes structures of **10-12**: Sn (grey) and Ge (green) (left); Sn (grey) and Pb (green) (right). Li atoms were removed.

### 3. Theoretical study

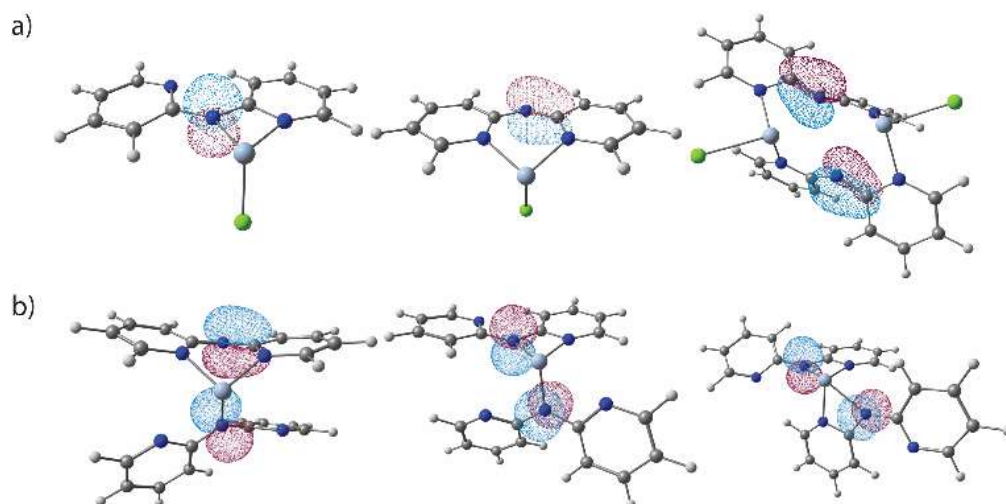

**Figure S40:** p-orbital associated with bridging nitrogen of *dpa* ligand in different coordination modes for heteroleptic chlorogermaylenes (a) and homoleptic (*dpa*)<sub>2</sub>Ge compounds (b).

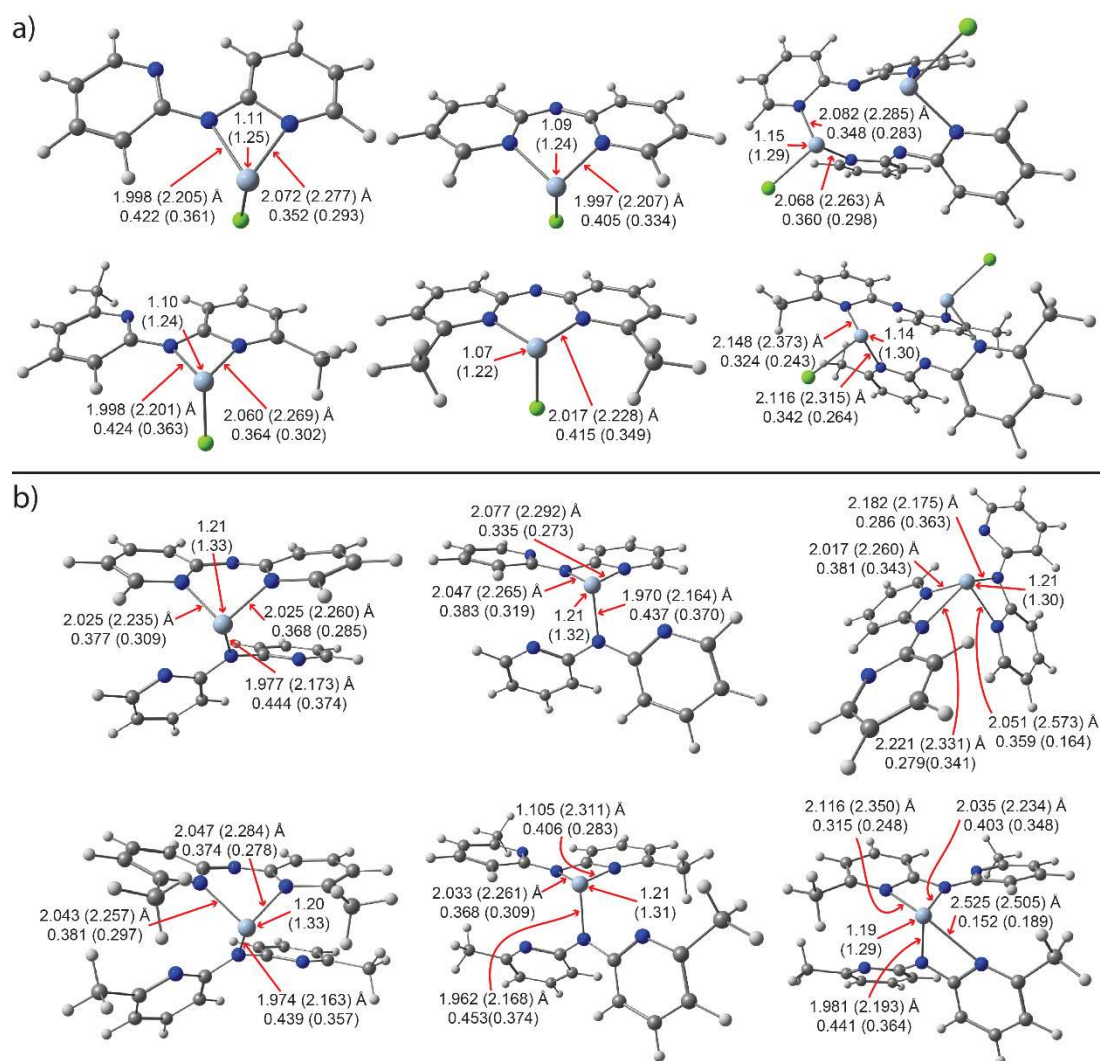

**Figure S41:** Calculated bond lengths, Wiberg bond indices and natural charges for *dpa*- and *Me-dpa* Ge and Sn (in bracket) compounds.

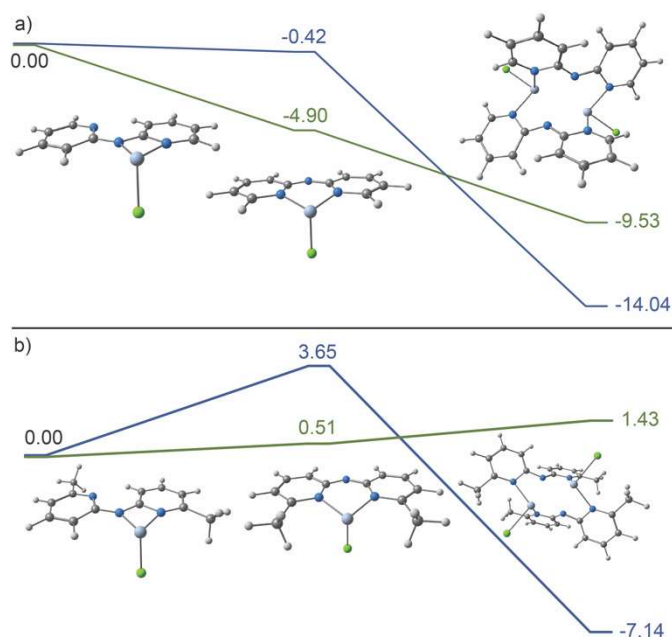

**Figure S42:** Relative energies between optimized structures (M062X/def2-TZVP level of theory) of chlorogermynes (green curve) and chlorostannynes (blue curve) with different arrangement of *dpa* (a) and *Me-dpa* (b) ligand. Electronic energies, given in kcal/mol are related to respective species with four-membered *N,N*-chelate ring.

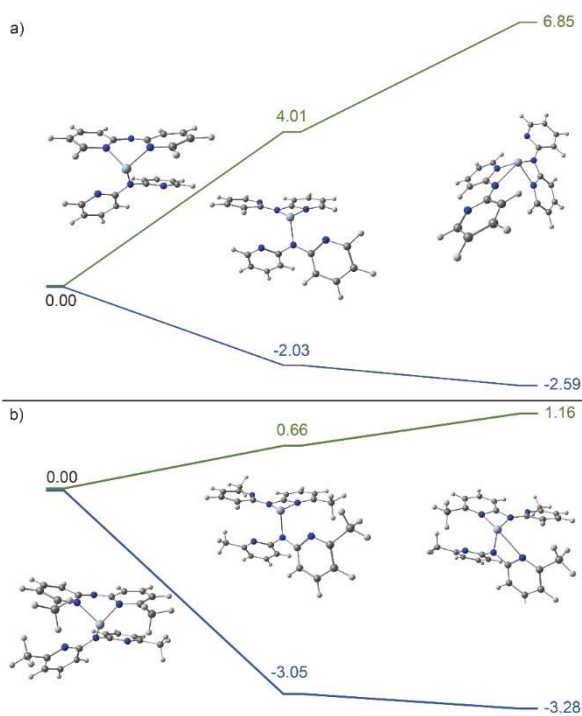

**Figure S43:** Relative energies between optimized structures (M062X/def2-TZVP level of theory) of homoleptic Ge (green curves) and Sn (blue curves) complexes with different arrangement of *dpa* (a) and *Me-dpa* (b) ligand respectively. Electronic energies, given in kcal/mol are related to respective species with six-membered *N,N*-chelate ring.



**Table S2.** Topological properties of BCPs for complexes **10-11a** in a.u.<sup>[a]</sup>

| Complex    | Bond               | $\rho(r_{cp})$ | $\nabla^2\rho(r_{cp})$ | $G(r_{cp})$ | $V(r_{cp})$ | $H(r_{cp})$ |
|------------|--------------------|----------------|------------------------|-------------|-------------|-------------|
| <b>10</b>  | Li4...N(5, 32, 59) | 0.023          | 0.017                  | 0.034       | -0.025      | 0.009       |
|            |                    | 0.023          | 0.017                  | 0.034       | -0.025      | 0.009       |
|            |                    | 0.023          | 0.017                  | 0.034       | -0.025      | 0.009       |
| <b>10a</b> | Ge119...Li3        | 0.018          | 0.081                  | 0.017       | -0.014      | 0.003       |
| <b>11</b>  | Li3...N(4, 31, 58) | 0.022          | 0.162                  | 0.032       | -0.023      | 0.009       |
|            |                    | 0.022          | 0.162                  | 0.032       | -0.023      | 0.009       |
|            |                    | 0.022          | 0.162                  | 0.032       | -0.023      | 0.009       |
| <b>11a</b> | Sn1...Li4          | 0.016          | 0.061                  | 0.013       | -0.011      | 0.002       |

<sup>[a]</sup> $\rho(r_{cp})$  - the electron density,  $\nabla^2\rho(r_{cp})$  - the Laplacian function of the electron density,  $G(r_{cp})$  - the kinetic electron energy density,  $V(r_{cp})$  - the potential electron energy density,  $H(r_{cp})$  - the total electron energy density.

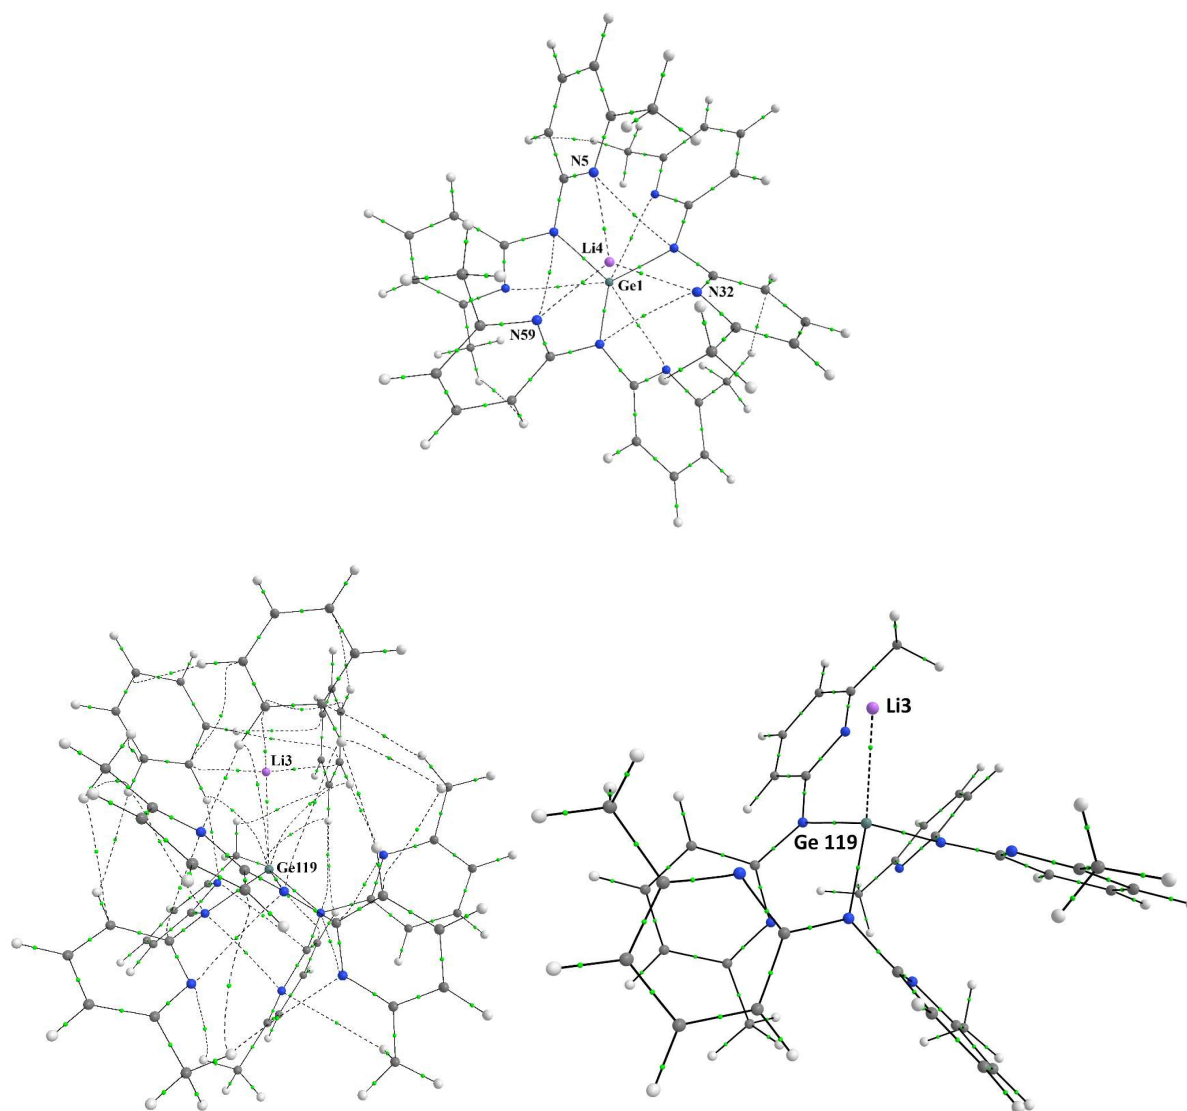**Figure S44:** Molecular graphs of complexes **10** and **10a** / the key fragment of it. Only critical points (3, -1) are presented for clarity (green).

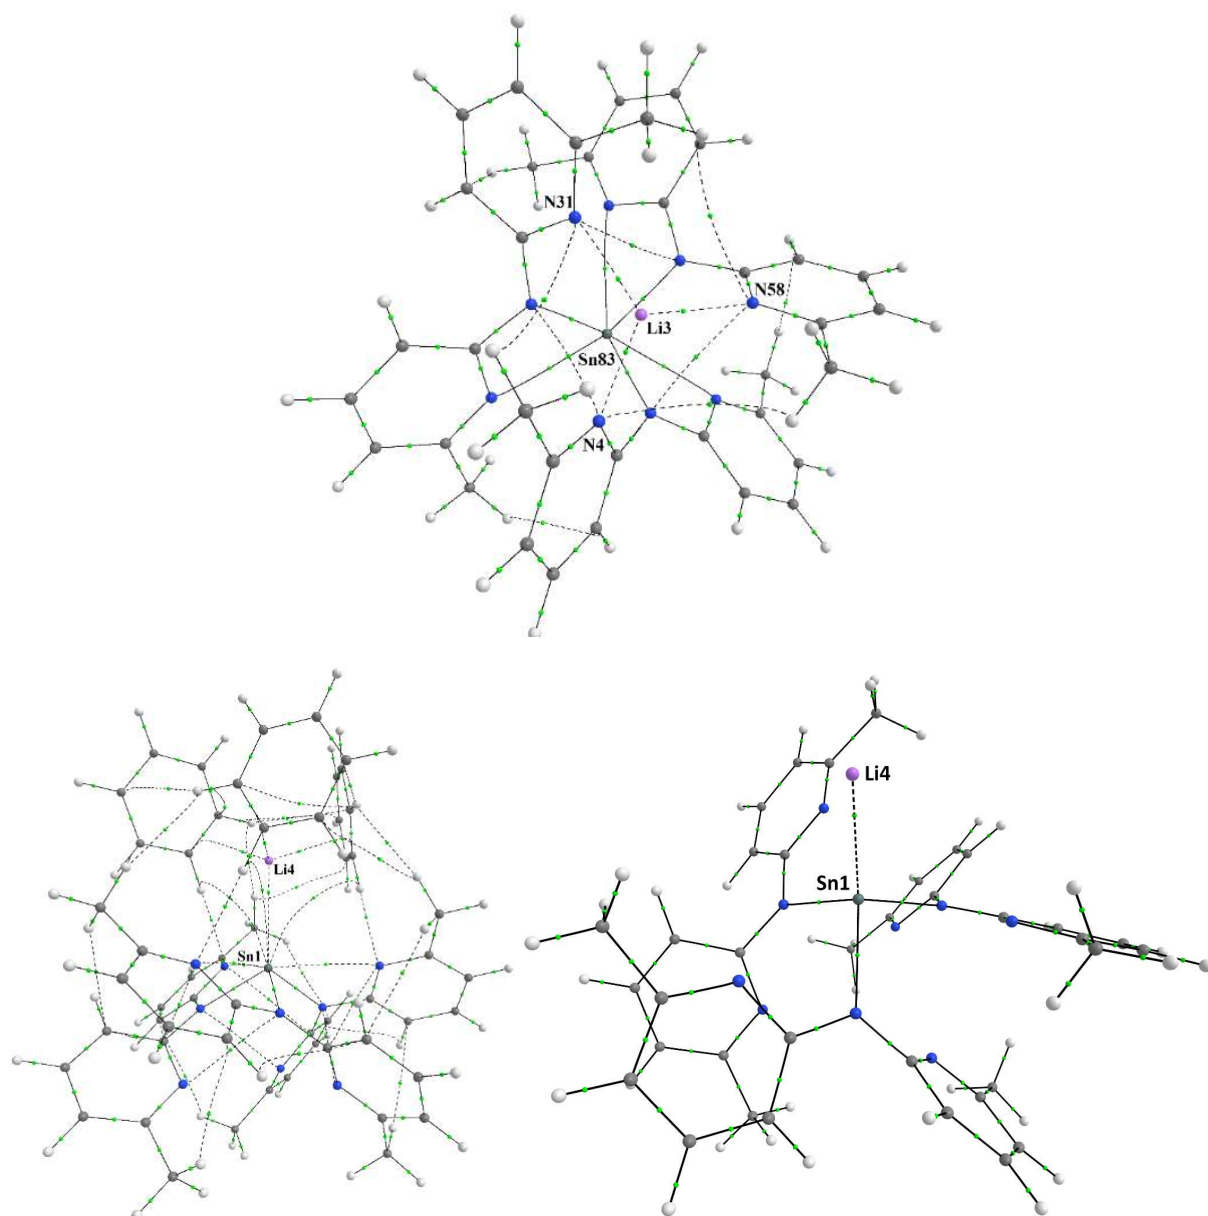

**Figure S45:** Molecular graphs of complexes **11** and **11a** / the key fragment of it. Only critical points (3, -1) are presented for clarity (green).

**Table S3:** Energy values of HOMO and LUMO in eV.

| Complex |            |            |            |
|---------|------------|------------|------------|
|         | <b>10</b>  | <b>11</b>  | <b>12</b>  |
| HOMO    | -4.77      | -5.01      | -5.21      |
| LUMO    | -0.73      | -0.66      | -0.61      |
| HOMO-2  |            |            | -5.24      |
| Complex |            |            |            |
|         | <b>10a</b> | <b>11a</b> | <b>12a</b> |
| HOMO    | -4.70      | -4.76      | -4.77      |
| LUMO    | -0.99      | -1.14      | -1.41      |
| HOMO-3  |            |            | -5.78      |

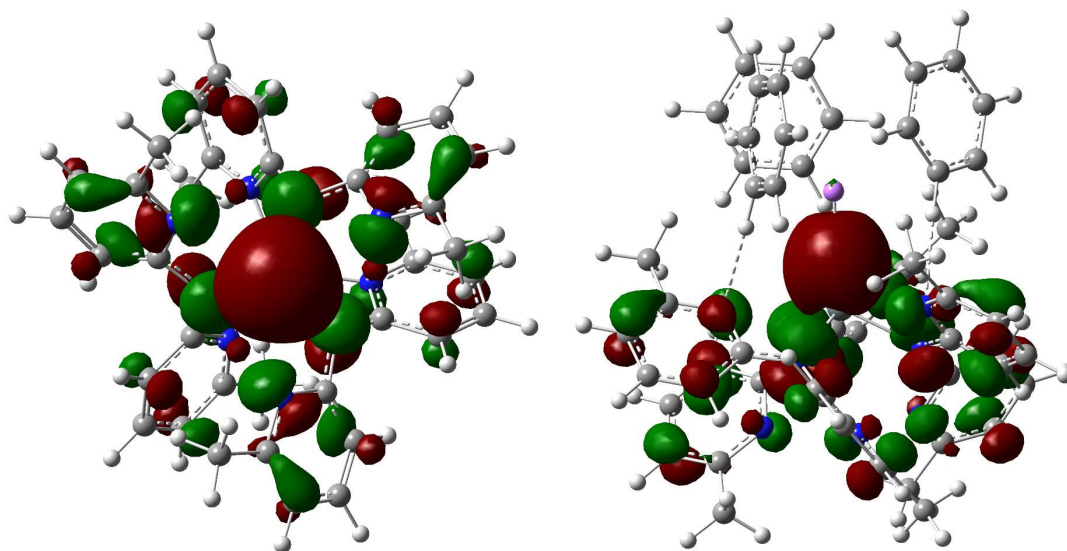

**Figure S46:** The HOMO orbitals for **11** and **11a** complexes (isovalue = 0.03).

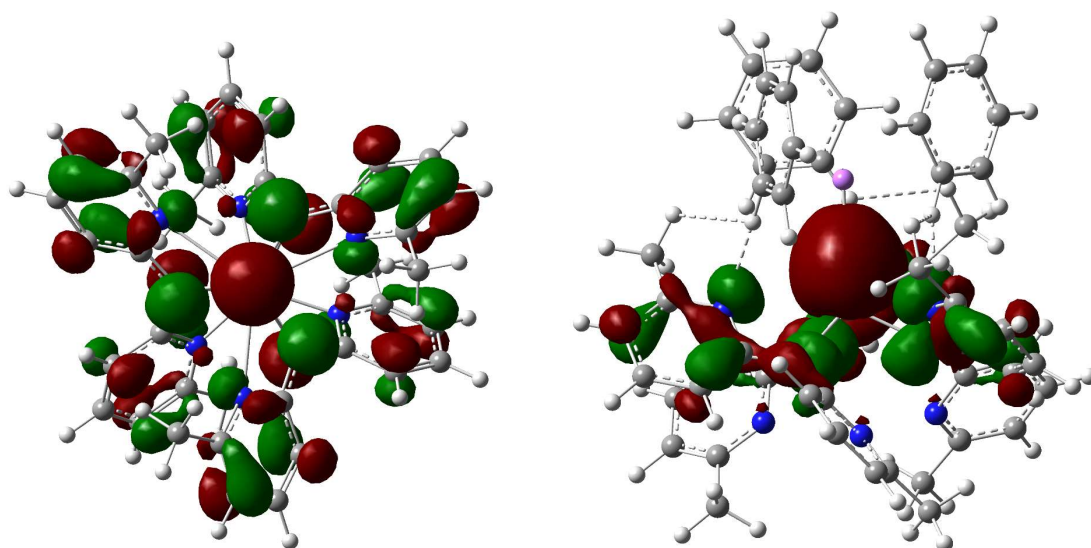

**Figure S47:** The HOMO-2 orbital for **12** and HOMO-3 for **12a** complexes (isovalue = 0.03).
