# Supplementary figures and images for: Coordination capabilities of bis-(2-pyridyl)amides in the field of divalent germanium, tin and lead compounds
Source: Royal Society of Chemistry journal article supplement (doi:10.1039/d1dt00717c), 2021-01-01

|    |              |             |              |        |              |             |              |
|-------------------------------------------------------------------------------------|--------------|-------------|--------------|--------|--------------|-------------|--------------|
| M = Ge                                                                              |              |             |              | M = Sn |              |             |              |
| 32                                                                                  | 5.704329000  | 5.875624000 | 8.775833000  | 50     | 5.948180000  | 5.829123000 | 8.830679000  |
| 17                                                                                  | 6.771012000  | 7.356646000 | 7.450328000  | 17     | 6.908776000  | 7.527346000 | 7.370872000  |
| 7                                                                                   | 4.197738000  | 7.188819000 | 9.323093000  | 7      | 4.197066000  | 7.176559000 | 9.382140000  |
| 6                                                                                   | 3.334500000  | 6.690654000 | 8.404617000  | 6      | 3.370189000  | 6.665919000 | 8.433972000  |
| 7                                                                                   | 4.030198000  | 5.769748000 | 7.689680000  | 7      | 4.049149000  | 5.733086000 | 7.715159000  |
| 6                                                                                   | 3.846381000  | 8.126566000 | 10.199594000 | 6      | 3.800544000  | 8.123870000 | 10.229469000 |
| 6                                                                                   | 2.570178000  | 8.640831000 | 10.198155000 | 6      | 2.524941000  | 8.637269000 | 10.185879000 |
| 1                                                                                   | 2.289872000  | 9.409766000 | 10.902157000 | 1      | 2.219455000  | 9.409223000 | 10.876179000 |
| 7                                                                                   | 2.319481000  | 5.050242000 | 6.265040000  | 7      | 2.310113000  | 5.056792000 | 6.281893000  |
| 6                                                                                   | 1.660011000  | 8.138586000 | 9.262172000  | 6      | 1.653543000  | 8.125584000 | 9.220788000  |
| 1                                                                                   | 0.649134000  | 8.527027000 | 9.244085000  | 1      | 0.641976000  | 8.507961000 | 9.158059000  |
| 6                                                                                   | 2.012436000  | 7.158377000 | 8.358588000  | 6      | 2.048723000  | 7.142145000 | 8.340796000  |
| 1                                                                                   | 1.323495000  | 6.757403000 | 7.635055000  | 1      | 1.387261000  | 6.738107000 | 7.594485000  |
| 6                                                                                   | 3.595133000  | 4.993843000 | 6.638217000  | 6      | 3.585831000  | 4.983726000 | 6.658572000  |
| 1                                                                                   | 4.610746000  | 8.456049000 | 10.892096000 | 1      | 4.536170000  | 8.467850000 | 10.946414000 |
| 6                                                                                   | 1.928044000  | 4.287774000 | 5.242864000  | 6      | 1.906619000  | 4.309663000 | 5.252931000  |
| 6                                                                                   | 2.767356000  | 3.437606000 | 4.550307000  | 6      | 2.729735000  | 3.453813000 | 4.549335000  |
| 1                                                                                   | 2.393364000  | 2.841545000 | 3.730137000  | 1      | 2.346056000  | 2.872547000 | 3.723114000  |
| 6                                                                                   | 4.102925000  | 3.383742000 | 4.944158000  | 6      | 4.064799000  | 3.376099000 | 4.942931000  |
| 1                                                                                   | 4.803834000  | 2.738906000 | 4.429131000  | 1      | 4.756337000  | 2.725430000 | 4.422405000  |
| 6                                                                                   | 4.529347000  | 4.165394000 | 5.992695000  | 6      | 4.501514000  | 4.140932000 | 5.998017000  |
| 1                                                                                   | 5.563884000  | 4.157999000 | 6.313760000  | 1      | 5.537169000  | 4.109277000 | 6.314941000  |
| 1                                                                                   | 0.880864000  | 4.367565000 | 4.970950000  | 1      | 0.860113000  | 4.408386000 | 4.983682000  |
|  |              |             |              |        |              |             |              |
| M = Ge                                                                              |              |             |              | M = Sn |              |             |              |
| 32                                                                                  | -0.037518000 | 6.999599000 |              | 50     | -0.162918000 | 7.103367000 |              |
|                                                                                     | 13.614006000 |             |              |        | 13.827320000 |             |              |
| 17                                                                                  | 1.886593000  | 8.180065000 |              | 17     | 1.911042000  | 8.358394000 |              |
|                                                                                     | 13.322233000 |             |              |        | 13.494051000 |             |              |
| 7                                                                                   | -0.504122000 | 7.020805000 | 11.672161000 | 7      | -0.575903000 | 7.065425000 | 11.659619000 |
| 6                                                                                   | 0.102656000  | 6.264585000 | 10.713887000 | 6      | 0.043811000  | 6.270946000 | 10.742443000 |
| 7                                                                                   | 0.948141000  | 5.260385000 | 10.943021000 | 7      | 0.869294000  | 5.256519000 | 11.002895000 |
| 6                                                                                   | -0.203528000 | 6.556383000 | 9.353165000  | 6      | -0.216709000 | 6.529336000 | 9.362686000  |
| 1                                                                                   | 0.298199000  | 5.959569000 | 8.605297000  | 1      | 0.293180000  | 5.898759000 | 8.648821000  |
| 7                                                                                   | 0.846691000  | 5.230397000 | 13.336470000 | 7      | 0.843414000  | 5.184338000 | 13.408335000 |
| 6                                                                                   | -1.093677000 | 7.533111000 | 9.026807000  | 6      | -1.071356000 | 7.515866000 | 8.976907000  |
| 1                                                                                   | -1.316772000 | 7.738075000 | 7.987311000  | 1      | -1.256896000 | 7.692922000 | 7.924886000  |
| 6                                                                                   | -1.725752000 | 8.274196000 | 10.045027000 | 6      | -1.713776000 | 8.302673000 | 9.952309000  |
| 1                                                                                   | -2.440851000 | 9.052804000 | 9.826482000  | 1      | -2.401118000 | 9.093065000 | 9.690589000  |
| 6                                                                                   | -1.396504000 | 7.986397000 | 11.332785000 | 6      | -1.429576000 | 8.039851000 | 11.257437000 |
| 1                                                                                   | -1.832165000 | 8.529254000 | 12.164696000 | 1      | -1.887198000 | 8.621738000 | 12.051660000 |
| 6                                                                                   | 1.253026000  | 4.739849000 | 12.131235000 | 6      | 1.209237000  | 4.726352000 | 12.178346000 |
| 6                                                                                   | 2.055416000  | 3.562309000 | 12.136364000 | 6      | 2.026229000  | 3.556666000 | 12.126173000 |
| 1                                                                                   | 2.383413000  | 3.195761000 | 11.174448000 | 1      | 2.318047000  | 3.215109000 | 11.143627000 |
| 6                                                                                   | 2.375543000  | 2.934902000 | 13.301161000 | 6      | 2.405601000  | 2.907692000 | 13.260809000 |
| 1                                                                                   | 2.983134000  | 2.038849000 | 13.285137000 | 1      | 3.023126000  | 2.020409000 | 13.198230000 |
| 6                                                                                   | 1.911806000  | 3.452868000 | 14.526787000 | 6      | 1.989372000  | 3.394717000 | 14.514897000 |

|   |             |             |              |   |             |             |              |
|---|-------------|-------------|--------------|---|-------------|-------------|--------------|
| 1 | 2.140078000 | 2.981102000 | 15.470550000 | 1 | 2.264628000 | 2.909335000 | 15.439178000 |
| 6 | 1.166228000 | 4.589676000 | 14.490274000 | 6 | 1.225254000 | 4.521281000 | 14.528410000 |
| 1 | 0.791482000 | 5.051794000 | 15.397237000 | 1 | 0.884731000 | 4.947971000 | 15.466909000 |

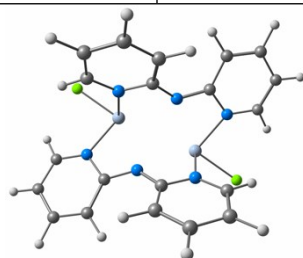

| M = Ge |              |             |              | M = Sn |              |             |              |
|--------|--------------|-------------|--------------|--------|--------------|-------------|--------------|
| 32     | 5.332295000  | 7.839845000 | 9.016673000  | 50     | 5.384100000  | 8.042522000 | 9.063956000  |
| 17     | 4.393026000  | 8.135206000 |              | 17     | 4.238436000  | 8.091860000 |              |
|        | 11.145570000 |             |              |        | 11.314258000 |             |              |
| 7      | 3.557432000  | 7.010866000 | 8.312607000  | 7      | 3.458411000  | 7.106468000 | 8.264868000  |
| 6      | 3.782178000  | 6.417403000 | 7.108594000  | 6      | 3.725244000  | 6.482661000 | 7.091720000  |
| 32     | 7.499983000  | 7.855043000 | 5.962930000  | 50     | 7.447850000  | 8.058082000 | 5.917498000  |
| 17     | 8.438724000  | 8.170599000 | 3.836700000  | 17     | 8.593409000  | 8.129107000 | 3.667721000  |
| 7      | 5.071948000  | 6.440568000 | 6.746979000  | 7      | 5.027835000  | 6.519520000 | 6.741357000  |
| 6      | 2.672586000  | 5.939388000 | 6.373371000  | 6      | 2.648469000  | 5.944627000 | 6.350241000  |
| 1      | 2.831534000  | 5.508403000 | 5.395711000  | 1      | 2.840151000  | 5.483112000 | 5.392522000  |
| 7      | 6.871686000  | 5.958597000 | 5.428530000  | 7      | 6.798437000  | 5.949217000 | 5.414491000  |
| 6      | 1.409250000  | 6.079198000 | 6.889168000  | 6      | 1.369741000  | 6.059823000 | 6.836281000  |
| 1      | 0.557914000  | 5.727010000 | 6.319577000  | 1      | 0.542804000  | 5.660975000 | 6.261437000  |
| 7      | 5.963881000  | 5.939901000 | 9.534509000  | 7      | 6.037153000  | 5.930455000 | 9.548477000  |
| 6      | 1.213013000  | 6.688896000 | 8.133656000  | 6      | 1.128275000  | 6.700948000 | 8.055719000  |
| 1      | 0.228004000  | 6.813075000 | 8.557842000  | 1      | 0.131618000  | 6.803128000 | 8.458295000  |
| 6      | 2.317552000  | 7.150538000 | 8.803848000  | 6      | 2.207606000  | 7.218044000 | 8.729453000  |
| 1      | 2.247307000  | 7.645787000 | 9.763541000  | 1      | 2.105308000  | 7.734026000 | 9.676409000  |
| 7      | 7.762778000  | 6.436480000 | 8.220340000  | 7      | 7.806758000  | 6.515411000 | 8.226668000  |
| 6      | 5.665099000  | 5.568893000 | 5.926201000  | 6      | 5.619692000  | 5.582027000 | 5.978126000  |
| 7      | 9.276286000  | 7.023031000 | 6.659750000  | 7      | 9.375157000  | 7.118387000 | 6.708370000  |
| 6      | 5.209808000  | 4.259467000 | 5.620101000  | 6      | 5.180060000  | 4.246026000 | 5.800822000  |
| 1      | 4.280424000  | 3.914695000 | 6.048259000  | 1      | 4.272628000  | 3.918839000 | 6.286596000  |
| 6      | 5.969639000  | 3.432139000 | 4.838200000  | 6      | 5.932430000  | 3.371362000 | 5.060166000  |
| 1      | 5.620540000  | 2.429395000 | 4.623692000  | 1      | 5.597813000  | 2.347884000 | 4.941617000  |
| 6      | 7.199701000  | 3.870842000 | 4.331939000  | 6      | 7.132264000  | 3.789148000 | 4.474768000  |
| 1      | 7.820156000  | 3.243313000 | 3.710209000  | 1      | 7.741958000  | 3.124401000 | 3.881512000  |
| 6      | 7.605917000  | 5.136265000 | 4.660984000  | 6      | 7.523771000  | 5.086475000 | 4.689461000  |
| 1      | 8.545716000  | 5.541220000 | 4.308694000  | 1      | 8.442221000  | 5.483009000 | 4.273920000  |
| 6      | 7.171146000  | 5.556652000 | 9.033480000  | 6      | 7.216523000  | 5.570248000 | 8.981652000  |
| 6      | 7.628713000  | 4.245399000 | 9.328154000  | 6      | 7.658457000  | 4.233504000 | 9.147246000  |
| 1      | 8.558696000  | 3.905992000 | 8.897020000  | 1      | 8.566446000  | 3.912149000 | 8.658629000  |
| 6      | 6.870318000  | 3.409961000 | 10.102791000 | 6      | 6.907601000  | 3.351089000 | 9.880204000  |
| 1      | 7.221159000  | 2.405993000 | 10.308550000 | 1      | 7.243982000  | 2.327190000 | 9.989783000  |
| 6      | 5.639491000  | 3.842090000 | 10.612834000 | 6      | 5.707056000  | 3.761663000 | 10.469235000 |
| 1      | 5.020125000  | 3.208082000 | 11.229052000 | 1      | 5.098514000  | 3.090694000 | 11.056641000 |
| 6      | 5.231077000  | 5.109627000 | 10.294834000 | 6      | 5.313314000  | 5.060146000 | 10.265917000 |
| 1      | 4.290573000  | 5.509858000 | 10.650624000 | 1      | 4.394186000  | 5.451441000 | 10.684912000 |
| 6      | 9.052582000  | 6.418707000 | 7.858544000  | 6      | 9.109408000  | 6.483870000 | 7.876007000  |
| 6      | 10.163009000 | 5.936220000 | 8.589574000  | 6      | 10.187116000 | 5.941226000 | 8.612757000  |
| 1      | 10.004818000 | 5.496455000 | 9.563441000  | 1      | 9.996236000  | 5.471014000 | 9.566398000  |
| 6      | 11.426094000 | 6.082703000 | 8.075017000  | 6      | 11.465640000 | 6.062882000 | 8.127757000  |
| 1      | 12.278045000 | 5.727033000 | 8.641518000  | 1      | 12.293268000 | 5.660446000 | 8.699096000  |
| 6      | 11.621260000 | 6.703561000 | 6.835890000  | 6      | 11.705991000 | 6.715074000 | 6.913981000  |

|   |              |             |             |   |              |             |             |
|---|--------------|-------------|-------------|---|--------------|-------------|-------------|
| 1 | 12.606047000 | 6.833134000 | 6.412804000 | 1 | 12.702468000 | 6.822497000 | 6.512325000 |
| 6 | 10.515916000 | 7.169118000 | 6.169746000 | 6 | 10.625765000 | 7.236187000 | 6.244791000 |
| 1 | 10.585293000 | 7.672832000 | 5.214405000 | 1 | 10.727167000 | 7.760618000 | 5.302392000 |

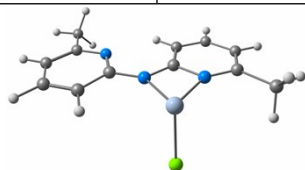

| M = Ge |              |             |              | M = Sn |              |             |              |
|--------|--------------|-------------|--------------|--------|--------------|-------------|--------------|
| 32     | 5.699202000  | 5.898691000 | 8.773154000  | 50     | 5.906521000  | 5.752949000 | 8.876038000  |
| 17     | 6.770498000  | 7.401685000 | 7.469973000  | 17     | 7.009586000  | 7.442447000 | 7.504684000  |
| 7      | 4.191365000  | 7.196195000 | 9.308926000  | 7      | 4.197225000  | 7.162474000 | 9.366036000  |
| 6      | 3.329498000  | 6.697573000 | 8.388829000  | 6      | 3.382670000  | 6.686370000 | 8.390023000  |
| 7      | 4.033865000  | 5.781812000 | 7.674552000  | 7      | 4.058965000  | 5.745445000 | 7.679460000  |
| 6      | 3.861790000  | 8.134683000 | 10.199807000 | 6      | 3.833293000  | 8.127320000 | 10.215078000 |
| 6      | 2.573791000  | 8.635443000 | 10.191843000 | 6      | 2.570518000  | 8.679227000 | 10.123074000 |
| 1      | 2.288927000  | 9.401983000 | 10.897753000 | 1      | 2.270235000  | 9.463736000 | 10.802399000 |
| 7      | 2.333921000  | 5.066456000 | 6.240048000  | 7      | 2.310510000  | 5.020139000 | 6.286363000  |
| 6      | 1.662375000  | 8.135715000 | 9.258570000  | 6      | 1.706802000  | 8.201951000 | 9.135324000  |
| 1      | 0.651559000  | 8.525249000 | 9.248684000  | 1      | 0.713163000  | 8.625395000 | 9.050564000  |
| 6      | 2.007543000  | 7.159869000 | 8.345983000  | 6      | 2.082508000  | 7.205559000 | 8.260807000  |
| 1      | 1.316096000  | 6.763017000 | 7.622897000  | 1      | 1.425280000  | 6.826157000 | 7.498037000  |
| 6      | 3.603258000  | 4.999001000 | 6.625538000  | 6      | 3.598133000  | 4.998348000 | 6.618937000  |
| 6      | 4.934996000  | 8.586626000 | 11.135091000 | 6      | 4.855811000  | 8.556495000 | 11.218592000 |
| 1      | 5.748320000  | 9.050505000 | 10.573292000 | 1      | 5.741508000  | 8.940619000 | 10.707890000 |
| 1      | 5.350127000  | 7.733948000 | 11.676602000 | 1      | 5.165249000  | 7.708663000 | 11.833761000 |
| 1      | 4.548829000  | 9.305933000 | 11.853681000 | 1      | 4.464091000  | 9.333969000 | 11.870783000 |
| 6      | 1.920734000  | 4.306562000 | 5.218105000  | 6      | 1.883626000  | 4.273207000 | 5.260228000  |
| 6      | 2.771659000  | 3.442313000 | 4.547886000  | 6      | 2.735116000  | 3.462897000 | 4.527367000  |
| 1      | 2.404650000  | 2.841312000 | 3.727528000  | 1      | 2.355445000  | 2.869696000 | 3.707141000  |
| 6      | 4.102343000  | 3.373946000 | 4.953356000  | 6      | 4.085529000  | 3.441770000 | 4.869914000  |
| 1      | 4.795167000  | 2.713417000 | 4.447005000  | 1      | 4.782562000  | 2.829535000 | 4.311098000  |
| 6      | 4.535736000  | 4.155296000 | 5.998360000  | 6      | 4.531652000  | 4.212083000 | 5.916431000  |
| 1      | 5.566860000  | 4.135078000 | 6.328034000  | 1      | 5.580065000  | 4.236409000 | 6.188218000  |
| 6      | 0.476052000  | 4.447274000 | 4.841140000  | 6      | 0.418989000  | 4.366017000 | 4.950189000  |
| 1      | 0.212951000  | 3.795370000 | 4.009838000  | 1      | 0.141213000  | 3.712614000 | 4.124782000  |
| 1      | 0.263030000  | 5.480194000 | 4.560125000  | 1      | 0.157617000  | 5.393148000 | 4.688812000  |
| 1      | -0.158580000 | 4.204178000 | 5.695064000  | 1      | -0.167318000 | 4.094681000 | 5.829634000  |

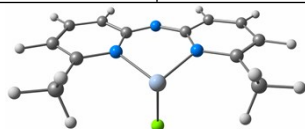

| M = Ge |              |             |              | M = Sn |              |             |              |
|--------|--------------|-------------|--------------|--------|--------------|-------------|--------------|
| 32     | -0.352872000 | 6.805074000 |              | 50     | -0.651675000 | 6.765778000 |              |
|        | 13.662880000 |             |              |        | 13.866798000 |             |              |
| 17     | 1.436529000  | 8.241276000 |              | 17     | 1.178025000  | 8.402868000 |              |
|        | 13.727055000 |             |              |        | 14.112511000 |             |              |
| 7      | -0.608409000 | 7.028545000 | 11.675056000 | 7      | -0.702074000 | 7.063173000 | 11.659662000 |
| 6      | -0.030129000 | 6.213200000 | 10.745890000 | 6      | -0.126533000 | 6.195815000 | 10.778208000 |
| 7      | 0.752383000  | 5.166575000 | 11.000466000 | 7      | 0.608426000  | 5.122906000 | 11.072161000 |
| 6      | -0.274024000 | 6.479269000 | 9.368161000  | 6      | -0.312084000 | 6.433284000 | 9.383448000  |
| 1      | 0.198888000  | 5.817691000 | 8.657593000  | 1      | 0.148080000  | 5.727352000 | 8.708069000  |
| 7      | 0.813005000  | 5.180381000 | 13.402526000 | 7      | 0.795057000  | 5.116861000 | 13.478888000 |
| 6      | -1.060222000 | 7.520571000 | 8.990125000  | 6      | -1.022108000 | 7.505861000 | 8.945296000  |
| 1      | -1.239672000 | 7.717999000 | 7.940694000  | 1      | -1.151014000 | 7.680080000 | 7.884246000  |
| 6      | -1.635978000 | 8.345079000 | 9.971237000  | 6      | -1.582521000 | 8.392431000 | 9.879482000  |

|   |              |             |              |   |              |             |              |
|---|--------------|-------------|--------------|---|--------------|-------------|--------------|
| 1 | -2.258066000 | 9.185875000 | 9.702185000  | 1 | -2.143855000 | 9.260159000 | 9.565576000  |
| 6 | -1.396620000 | 8.083395000 | 11.291170000 | 6 | -1.409409000 | 8.145446000 | 11.213621000 |
| 6 | 1.146935000  | 4.682754000 | 12.176393000 | 6 | 1.067237000  | 4.643922000 | 12.228783000 |
| 6 | 1.989632000  | 3.536017000 | 12.119211000 | 6 | 1.932496000  | 3.515384000 | 12.110858000 |
| 1 | 2.237214000  | 3.167427000 | 11.134791000 | 1 | 2.125211000  | 3.157175000 | 11.110471000 |
| 6 | 2.450949000  | 2.955268000 | 13.257300000 | 6 | 2.488166000  | 2.942550000 | 13.210687000 |
| 1 | 3.092862000  | 2.084745000 | 13.206080000 | 1 | 3.148758000  | 2.090457000 | 13.108954000 |
| 6 | 2.093751000  | 3.495589000 | 14.504036000 | 6 | 2.205078000  | 3.468537000 | 14.481896000 |
| 1 | 2.451750000  | 3.062050000 | 15.426100000 | 1 | 2.637761000  | 3.044028000 | 15.375854000 |
| 6 | 1.285139000  | 4.596495000 | 14.550359000 | 6 | 1.362773000  | 4.541551000 | 14.582204000 |
| 6 | 0.905226000  | 5.198230000 | 15.871317000 | 6 | 1.034763000  | 5.122088000 | 15.926885000 |
| 1 | -0.173868000 | 5.167653000 | 16.032419000 | 1 | -0.029033000 | 5.023090000 | 16.158398000 |
| 1 | 1.385165000  | 4.640091000 | 16.672096000 | 1 | 1.590431000  | 4.597902000 | 16.701252000 |
| 1 | 1.228791000  | 6.239266000 | 15.944023000 | 1 | 1.303885000  | 6.180173000 | 15.980099000 |
| 6 | -1.989158000 | 8.961601000 | 12.353715000 | 6 | -2.001997000 | 9.069990000 | 12.236772000 |
| 1 | -2.554832000 | 9.763002000 | 11.883740000 | 1 | -2.491798000 | 9.904981000 | 11.740722000 |
| 1 | -2.663440000 | 8.404679000 | 13.006795000 | 1 | -2.751991000 | 8.563043000 | 12.849614000 |
| 1 | -1.213694000 | 9.415068000 | 12.975615000 | 1 | -1.232819000 | 9.477985000 | 12.897611000 |

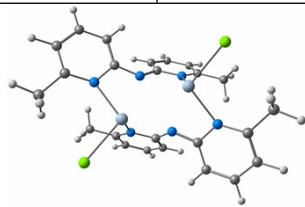

| M = Ge |              |              |              | M = Sn |              |              |              |
|--------|--------------|--------------|--------------|--------|--------------|--------------|--------------|
| 32     | 1.521851000  | -0.894989000 | -1.256485000 | 50     | 1.515766000  | -0.981169000 | -1.279414000 |
| 17     | 2.964729000  | -2.782075000 | -1.430885000 | 17     | 3.227371000  | -2.868355000 | -1.186908000 |
| 7      | 2.902340000  | 0.680177000  | -0.779022000 | 7      | 2.893373000  | 0.862612000  | -0.700674000 |
| 6      | 2.152222000  | 1.614943000  | -0.137626000 | 6      | 2.098830000  | 1.732322000  | -0.037711000 |
| 32     | -1.521855000 | 0.895009000  | -1.256478000 | 50     | -1.515763000 | 0.981479000  | -1.279202000 |
| 17     | -2.964735000 | 2.782093000  | -1.430836000 | 17     | -3.227304000 | 2.868698000  | -1.186322000 |
| 7      | 0.853243000  | 1.275055000  | -0.030028000 | 7      | 0.794993000  | 1.354673000  | 0.055560000  |
| 6      | 2.746858000  | 2.824460000  | 0.273376000  | 6      | 2.637425000  | 2.940053000  | 0.444538000  |
| 1      | 2.143153000  | 3.570283000  | 0.769934000  | 1      | 1.994776000  | 3.639862000  | 0.959576000  |
| 7      | -1.270692000 | 1.379093000  | 0.788078000  | 7      | -1.272149000 | 1.336335000  | 0.995937000  |
| 6      | 4.067152000  | 3.047266000  | -0.025284000 | 6      | 3.961287000  | 3.219238000  | 0.205324000  |
| 1      | 4.536057000  | 3.978686000  | 0.267881000  | 1      | 4.386966000  | 4.150994000  | 0.557443000  |
| 7      | 1.270694000  | -1.379113000 | 0.788063000  | 7      | 1.272136000  | -1.336561000 | 0.995637000  |
| 6      | 4.797927000  | 2.096094000  | -0.739168000 | 6      | 4.750197000  | 2.321458000  | -0.513475000 |
| 1      | 5.827827000  | 2.272603000  | -1.013827000 | 1      | 5.787342000  | 2.534055000  | -0.730161000 |
| 6      | 4.184606000  | 0.919828000  | -1.120801000 | 6      | 4.180919000  | 1.146841000  | -0.965807000 |
| 7      | -0.853240000 | -1.275062000 | -0.030041000 | 7      | -0.795007000 | -1.354690000 | 0.055263000  |
| 6      | 0.062060000  | 1.574995000  | 1.010604000  | 6      | 0.060666000  | 1.534279000  | 1.173949000  |
| 7      | -2.902333000 | -0.680167000 | -0.779037000 | 7      | -2.893390000 | -0.862408000 | -0.700821000 |
| 6      | 0.505124000  | 1.952173000  | 2.297060000  | 6      | 0.562184000  | 1.782946000  | 2.468326000  |
| 1      | 1.563359000  | 2.066534000  | 2.479784000  | 1      | 1.625445000  | 1.901734000  | 2.618276000  |
| 6      | -0.412414000 | 2.126168000  | 3.298917000  | 6      | -0.314548000 | 1.833357000  | 3.522876000  |
| 1      | -0.081724000 | 2.407352000  | 4.291451000  | 1      | 0.059091000  | 2.015817000  | 4.523360000  |
| 6      | -1.766812000 | 1.918856000  | 3.047162000  | 6      | -1.675285000 | 1.621114000  | 3.315720000  |
| 1      | -2.506714000 | 2.037827000  | 3.825114000  | 1      | -2.379542000 | 1.641429000  | 4.134920000  |
| 6      | -2.170309000 | 1.527592000  | 1.785268000  | 6      | -2.125192000 | 1.353312000  | 2.035293000  |
| 6      | -0.062059000 | -1.575013000 | 1.010589000  | 6      | -0.060672000 | -1.534612000 | 1.173594000  |
| 6      | -0.505122000 | -1.952201000 | 2.297042000  | 6      | -0.562168000 | -1.783716000 | 2.467901000  |
| 1      | -1.563357000 | -2.066560000 | 2.479767000  | 1      | -1.625420000 | -1.902613000 | 2.617826000  |
| 6      | 0.412417000  | -2.126209000 | 3.298896000  | 6      | 0.314574000  | -1.834414000 | 3.522428000  |
| 1      | 0.081728000  | -2.407401000 | 4.291428000  | 1      | -0.059049000 | -2.017215000 | 4.522855000  |

|   |              |              |              |   |              |              |              |
|---|--------------|--------------|--------------|---|--------------|--------------|--------------|
| 6 | 1.766815000  | -1.918901000 | 3.047140000  | 6 | 1.675299000  | -1.622028000 | 3.315333000  |
| 1 | 2.506718000  | -2.037885000 | 3.825089000  | 1 | 2.379559000  | -1.642552000 | 4.134524000  |
| 6 | 2.170312000  | -1.527626000 | 1.785249000  | 6 | 2.125184000  | -1.353806000 | 2.034988000  |
| 6 | -2.152221000 | -1.614940000 | -0.137642000 | 6 | -2.098846000 | -1.732307000 | -0.038109000 |
| 6 | -2.746868000 | -2.824452000 | 0.273359000  | 6 | -2.637440000 | -2.940174000 | 0.443800000  |
| 1 | -2.143170000 | -3.570280000 | 0.769917000  | 1 | -1.994785000 | -3.640133000 | 0.958626000  |
| 6 | -4.067163000 | -3.047248000 | -0.025304000 | 6 | -3.961306000 | -3.219286000 | 0.204525000  |
| 1 | -4.536076000 | -3.978665000 | 0.267861000  | 1 | -4.386983000 | -4.151142000 | 0.556382000  |
| 6 | -4.797930000 | -2.096072000 | -0.739190000 | 6 | -4.750222000 | -2.321295000 | -0.514002000 |
| 1 | -5.827830000 | -2.272574000 | -1.013854000 | 1 | -5.787373000 | -2.533822000 | -0.730730000 |
| 6 | -4.184600000 | -0.919810000 | -1.120822000 | 6 | -4.180942000 | -1.146554000 | -0.966012000 |
| 6 | -4.918904000 | 0.111656000  | -1.915961000 | 6 | -4.964813000 | -0.136151000 | -1.741630000 |
| 1 | -5.848855000 | -0.307402000 | -2.295073000 | 1 | -5.915301000 | -0.555617000 | -2.065235000 |
| 1 | -5.150578000 | 0.986985000  | -1.308611000 | 1 | -5.159462000 | 0.749984000  | -1.135193000 |
| 1 | -4.316241000 | 0.459706000  | -2.755247000 | 1 | -4.408597000 | 0.197069000  | -2.619534000 |
| 6 | -3.614640000 | 1.207038000  | 1.546791000  | 6 | -3.563814000 | 1.010773000  | 1.797000000  |
| 1 | -3.771659000 | 0.126528000  | 1.591849000  | 1 | -3.685359000 | -0.075876000 | 1.768699000  |
| 1 | -4.220472000 | 1.666768000  | 2.325349000  | 1 | -4.178729000 | 1.396634000  | 2.608265000  |
| 1 | -3.954018000 | 1.564766000  | 0.578979000  | 1 | -3.921168000 | 1.420999000  | 0.855002000  |
| 6 | 4.918920000  | -0.111634000 | -1.915938000 | 6 | 4.964778000  | 0.136662000  | -1.741727000 |
| 1 | 5.848880000  | 0.307423000  | -2.295029000 | 1 | 5.915263000  | 0.556219000  | -2.065223000 |
| 1 | 5.150577000  | -0.986971000 | -1.308595000 | 1 | 5.159430000  | -0.749650000 | -1.135550000 |
| 1 | 4.316271000  | -0.459670000 | -2.755239000 | 1 | 4.408548000  | -0.196298000 | -2.619720000 |
| 6 | 3.614644000  | -1.207076000 | 1.546772000  | 6 | 3.563778000  | -1.011079000 | 1.796797000  |
| 1 | 3.771668000  | -0.126568000 | 1.591845000  | 1 | 3.685215000  | 0.075589000  | 1.768745000  |
| 1 | 4.220476000  | -1.666820000 | 2.325323000  | 1 | 4.178716000  | -1.397064000 | 2.607985000  |
| 1 | 3.954015000  | -1.564794000 | 0.578955000  | 1 | 3.921190000  | -1.421053000 | 0.854711000  |

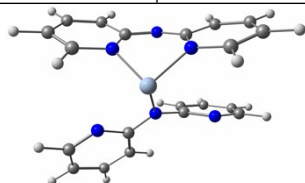

| M = Ge |              |              |              | M = Sn |              |              |              |
|--------|--------------|--------------|--------------|--------|--------------|--------------|--------------|
| 32     | 0.037233000  | -1.686893000 | 0.679606000  | 50     | -0.128904000 | -1.939321000 | 0.649774000  |
| 7      | 0.979090000  | -1.392442000 | -1.033298000 | 7      | 1.038855000  | -1.530302000 | -1.136986000 |
| 7      | -0.414645000 | 0.275984000  | 0.890829000  | 7      | -0.525186000 | 0.244363000  | 0.912335000  |
| 7      | 1.709950000  | -1.241493000 | 1.729968000  | 7      | 1.693846000  | -1.296592000 | 1.820554000  |
| 6      | 0.528707000  | 1.255860000  | 0.910034000  | 6      | 0.447034000  | 1.196156000  | 0.912635000  |
| 6      | -1.729414000 | 0.583205000  | 0.812122000  | 6      | -1.826445000 | 0.596632000  | 0.812145000  |
| 6      | -2.190082000 | 1.861801000  | 0.711116000  | 6      | -2.254345000 | 1.884332000  | 0.679307000  |
| 6      | -1.237383000 | 2.896475000  | 0.658964000  | 6      | -1.270621000 | 2.889639000  | 0.618877000  |
| 6      | 0.090028000  | 2.600896000  | 0.749963000  | 6      | 0.044978000  | 2.553419000  | 0.725646000  |
| 7      | 1.840079000  | 1.057120000  | 1.088902000  | 7      | 1.756854000  | 0.981463000  | 1.077344000  |
| 6      | 2.288106000  | -2.284891000 | 2.368473000  | 6      | 2.337614000  | -2.298487000 | 2.456839000  |
| 6      | 3.562925000  | -2.249858000 | 2.848194000  | 6      | 3.641000000  | -2.227630000 | 2.856113000  |
| 6      | 4.314417000  | -1.082011000 | 2.615047000  | 6      | 4.352152000  | -1.057645000 | 2.533087000  |
| 6      | 3.740028000  | -0.017483000 | 1.986704000  | 6      | 3.715981000  | -0.031479000 | 1.899307000  |
| 6      | 2.376304000  | -0.063105000 | 1.578620000  | 6      | 2.329470000  | -0.118963000 | 1.579465000  |
| 6      | 0.116698000  | -1.192661000 | -2.078705000 | 6      | 0.169951000  | -1.215524000 | -2.133862000 |
| 6      | 0.467913000  | -1.176844000 | -3.443995000 | 6      | 0.461675000  | -1.014120000 | -3.498673000 |
| 6      | -0.529429000 | -0.995566000 | -4.375685000 | 6      | -0.579059000 | -0.743932000 | -4.358245000 |
| 7      | -1.160670000 | -1.056758000 | -1.693967000 | 7      | -1.102342000 | -1.165770000 | -1.692114000 |
| 6      | -2.107551000 | -0.890194000 | -2.611993000 | 6      | -2.092125000 | -0.907010000 | -2.540546000 |
| 6      | -1.853342000 | -0.839620000 | -3.968617000 | 6      | -1.890089000 | -0.675392000 | -3.886501000 |
| 6      | 2.361375000  | -1.506429000 | -1.198002000 | 6      | 2.417592000  | -1.598760000 | -1.253938000 |
| 7      | 2.941909000  | -2.545877000 | -0.601484000 | 7      | 2.996102000  | -2.604873000 | -0.593458000 |

|   |              |              |              |   |              |              |              |
|---|--------------|--------------|--------------|---|--------------|--------------|--------------|
| 6 | 4.267144000  | -2.659882000 | -0.668820000 | 6 | 4.323221000  | -2.695297000 | -0.603602000 |
| 6 | 5.079266000  | -1.766559000 | -1.344546000 | 6 | 5.148468000  | -1.808500000 | -1.273354000 |
| 6 | 3.103266000  | -0.533090000 | -1.879881000 | 6 | 3.173424000  | -0.628805000 | -1.929135000 |
| 6 | 4.473160000  | -0.677272000 | -1.960424000 | 6 | 4.548018000  | -0.748571000 | -1.943060000 |
| 1 | -1.557310000 | 3.925758000  | 0.553882000  | 1 | -1.557499000 | 3.926364000  | 0.492516000  |
| 1 | 0.853894000  | 3.365002000  | 0.734769000  | 1 | 0.831493000  | 3.293866000  | 0.697484000  |
| 1 | -3.250283000 | 2.057157000  | 0.651315000  | 1 | -3.308242000 | 2.108088000  | 0.606566000  |
| 1 | -2.401269000 | -0.267276000 | 0.811922000  | 1 | -2.533852000 | -0.226761000 | 0.828201000  |
| 1 | 4.274892000  | 0.903889000  | 1.805685000  | 1 | 4.220813000  | 0.890107000  | 1.646849000  |
| 1 | 5.346615000  | -1.026547000 | 2.938454000  | 1 | 5.401453000  | -0.969978000 | 2.787578000  |
| 1 | 3.979996000  | -3.107096000 | 3.355128000  | 1 | 4.104570000  | -3.057826000 | 3.368172000  |
| 1 | 1.673251000  | -3.174248000 | 2.448829000  | 1 | 1.753107000  | -3.199109000 | 2.616509000  |
| 1 | 4.694799000  | -3.515009000 | -0.155717000 | 1 | 4.744516000  | -3.523708000 | -0.043253000 |
| 1 | 6.150001000  | -1.912409000 | -1.376704000 | 1 | 6.221972000  | -1.934670000 | -1.256172000 |
| 1 | 5.067445000  | 0.064568000  | -2.479349000 | 1 | 5.150205000  | -0.007646000 | -2.454421000 |
| 1 | 2.600237000  | 0.324978000  | -2.304754000 | 1 | 2.679563000  | 0.213947000  | -2.392525000 |
| 1 | 1.492180000  | -1.322861000 | -3.752842000 | 1 | 1.475211000  | -1.094441000 | -3.861786000 |
| 1 | -0.277715000 | -0.983238000 | -5.429297000 | 1 | -0.372505000 | -0.590652000 | -5.410642000 |
| 1 | -2.654791000 | -0.693914000 | -4.678201000 | 1 | -2.721192000 | -0.460448000 | -4.541944000 |
| 1 | -3.120214000 | -0.790986000 | -2.233920000 | 1 | -3.089914000 | -0.885977000 | -2.114765000 |

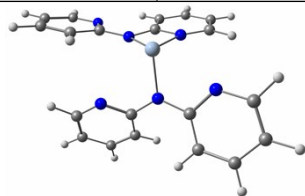

| M = Ge |              |              |              | M = Sn |              |              |              |
|--------|--------------|--------------|--------------|--------|--------------|--------------|--------------|
| 32     | -0.547108000 | 0.251245000  | -1.347970000 | 50     | -0.605194000 | 0.107850000  | -1.596997000 |
| 7      | 1.171340000  | 0.802145000  | -0.380692000 | 7      | 1.216826000  | 0.882733000  | -0.496705000 |
| 6      | 0.616708000  | 1.849636000  | 0.279763000  | 6      | 0.598839000  | 1.897377000  | 0.157358000  |
| 7      | -0.704350000 | 1.837908000  | -0.016700000 | 7      | -0.722786000 | 1.879532000  | -0.148151000 |
| 6      | -1.554563000 | 2.738756000  | 0.465204000  | 6      | -1.577665000 | 2.762597000  | 0.357726000  |
| 6      | -1.116338000 | 3.743526000  | 1.298595000  | 6      | -1.165637000 | 3.756543000  | 1.217252000  |
| 1      | -1.810671000 | 4.470634000  | 1.692457000  | 1      | -1.874002000 | 4.464330000  | 1.621404000  |
| 7      | 3.401489000  | 1.182611000  | 0.229117000  | 7      | 3.411603000  | 1.288174000  | 0.260531000  |
| 6      | 0.245522000  | 3.784475000  | 1.614217000  | 6      | 0.192455000  | 3.804400000  | 1.542697000  |
| 1      | 0.616454000  | 4.563372000  | 2.269448000  | 1      | 0.554108000  | 4.570708000  | 2.217922000  |
| 7      | -1.160580000 | -1.033628000 | 0.013492000  | 7      | -1.230264000 | -1.192092000 | 0.016699000  |
| 6      | 1.133503000  | 2.854134000  | 1.117904000  | 6      | 1.088510000  | 2.892825000  | 1.029805000  |
| 1      | 2.182317000  | 2.868429000  | 1.358661000  | 1      | 2.134175000  | 2.913844000  | 1.281663000  |
| 7      | 0.740722000  | -2.257245000 | -0.297465000 | 7      | 0.704310000  | -2.290614000 | -0.360341000 |
| 7      | -3.088636000 | 0.049878000  | -0.420671000 | 7      | -3.096559000 | -0.057261000 | -0.468736000 |
| 6      | 2.515769000  | 0.544860000  | -0.535034000 | 6      | 2.565577000  | 0.628516000  | -0.533687000 |
| 6      | 4.697325000  | 0.913333000  | 0.061015000  | 6      | 4.712884000  | 1.003652000  | 0.187540000  |
| 6      | 5.183553000  | 0.010086000  | -0.862064000 | 6      | 5.253205000  | 0.062332000  | -0.664164000 |
| 1      | 6.245584000  | -0.168064000 | -0.954240000 | 1      | 6.317541000  | -0.124819000 | -0.679141000 |
| 6      | 4.255499000  | -0.651572000 | -1.665887000 | 6      | 4.372866000  | -0.626239000 | -1.499660000 |
| 1      | 4.583887000  | -1.363948000 | -2.412928000 | 1      | 4.742409000  | -1.371464000 | -2.193843000 |
| 6      | 2.914643000  | -0.391657000 | -1.508514000 | 6      | 3.028411000  | -0.350790000 | -1.439622000 |
| 1      | 2.166782000  | -0.889342000 | -2.110262000 | 1      | 2.320229000  | -0.870459000 | -2.071341000 |
| 6      | -0.292695000 | -1.992473000 | 0.504991000  | 6      | -0.340636000 | -2.134655000 | 0.467468000  |
| 6      | 1.661246000  | -3.127758000 | 0.103409000  | 6      | 1.665913000  | -3.146706000 | -0.038516000 |
| 6      | 1.602459000  | -3.799140000 | 1.312181000  | 6      | 1.653042000  | -3.910204000 | 1.116711000  |
| 1      | 2.370646000  | -4.507620000 | 1.587458000  | 1      | 2.455483000  | -4.601526000 | 1.330122000  |
| 6      | 0.538646000  | -3.508579000 | 2.158020000  | 6      | 0.589936000  | -3.728828000 | 1.992138000  |
| 1      | 0.465337000  | -3.980147000 | 3.130289000  | 1      | 0.552063000  | -4.272479000 | 2.928205000  |

|   |              |              |              |   |              |              |              |
|---|--------------|--------------|--------------|---|--------------|--------------|--------------|
| 6 | -0.416750000 | -2.592506000 | 1.766450000  | 6 | -0.414727000 | -2.833386000 | 1.682574000  |
| 1 | -1.220562000 | -2.309642000 | 2.430374000  | 1 | -1.210219000 | -2.637826000 | 2.384803000  |
| 6 | -2.523378000 | -1.025545000 | 0.151656000  | 6 | -2.573279000 | -1.094308000 | 0.217601000  |
| 6 | -4.411944000 | 0.177257000  | -0.411418000 | 6 | -4.402990000 | 0.175846000  | -0.421702000 |
| 6 | -5.261565000 | -0.741965000 | 0.173286000  | 6 | -5.286091000 | -0.596869000 | 0.309034000  |
| 1 | -6.331274000 | -0.591003000 | 0.165943000  | 1 | -6.341256000 | -0.366398000 | 0.325172000  |
| 6 | -4.682349000 | -1.871486000 | 0.746322000  | 6 | -4.760299000 | -1.687765000 | 0.995850000  |
| 1 | -5.305232000 | -2.638101000 | 1.190940000  | 1 | -5.414024000 | -2.342528000 | 1.559255000  |
| 6 | -3.313972000 | -2.032338000 | 0.738655000  | 6 | -3.408107000 | -1.953890000 | 0.957903000  |
| 1 | -2.865643000 | -2.926260000 | 1.143310000  | 1 | -3.010535000 | -2.821378000 | 1.459195000  |
| 1 | 5.377859000  | 1.457288000  | 0.708019000  | 1 | 5.354380000  | 1.569060000  | 0.856136000  |
| 1 | -2.588807000 | 2.625388000  | 0.167122000  | 1 | -2.612028000 | 2.647633000  | 0.057077000  |
| 1 | -4.806026000 | 1.061411000  | -0.902246000 | 1 | -4.756212000 | 1.019748000  | -1.005518000 |
| 1 | 2.487536000  | -3.291851000 | -0.580706000 | 1 | 2.490129000  | -3.220716000 | -0.740220000 |

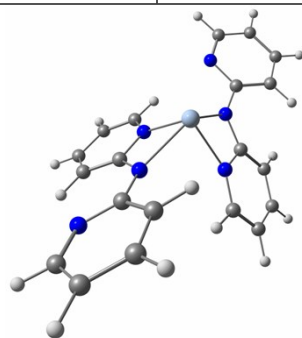

| M = Ge |              |              |              | M = Sn |              |              |              |
|--------|--------------|--------------|--------------|--------|--------------|--------------|--------------|
| 7      | -1.285062000 | 0.346510000  | -1.829080000 | 7      | -0.726993000 | 0.693945000  | -1.593063000 |
| 6      | -2.382045000 | 0.432810000  | -2.651452000 | 6      | -1.811915000 | 0.127712000  | -2.216394000 |
| 6      | -2.320097000 | 0.588628000  | -4.047471000 | 6      | -1.769845000 | -1.037395000 | -3.000536000 |
| 6      | -3.497263000 | 0.685032000  | -4.761172000 | 6      | -2.943749000 | -1.511046000 | -3.550147000 |
| 7      | -3.556011000 | 0.414521000  | -2.006047000 | 7      | -2.971166000 | 0.748287000  | -1.954648000 |
| 6      | -4.676779000 | 0.518677000  | -2.711534000 | 6      | -4.090315000 | 0.271904000  | -2.489314000 |
| 6      | -4.713320000 | 0.641089000  | -4.090682000 | 6      | -4.138153000 | -0.842754000 | -3.309043000 |
| 6      | -0.031270000 | -0.001917000 | -2.139558000 | 6      | 0.568062000  | 0.731708000  | -1.998078000 |
| 7      | 0.752831000  | 0.296627000  | -1.068736000 | 7      | 1.322161000  | 1.411178000  | -1.106660000 |
| 6      | 2.052787000  | 0.011024000  | -1.021411000 | 6      | 2.618976000  | 1.594391000  | -1.329760000 |
| 6      | 2.680219000  | -0.596838000 | -2.083035000 | 6      | 3.261294000  | 1.118069000  | -2.455544000 |
| 6      | 0.559067000  | -0.631977000 | -3.257428000 | 6      | 1.140313000  | 0.245478000  | -3.189731000 |
| 6      | 1.902547000  | -0.921091000 | -3.203059000 | 6      | 2.487551000  | 0.444673000  | -3.398770000 |
| 1      | 3.733791000  | -0.827239000 | -2.039361000 | 1      | 4.319988000  | 1.278495000  | -2.596252000 |
| 1      | 2.365424000  | -1.423488000 | -4.043856000 | 1      | 2.942048000  | 0.078152000  | -4.311253000 |
| 1      | -0.037882000 | -0.922444000 | -4.107731000 | 1      | 0.535287000  | -0.242721000 | -3.937065000 |
| 1      | -1.367330000 | 0.674028000  | -4.548459000 | 1      | -0.844306000 | -1.578112000 | -3.129636000 |
| 1      | -3.466161000 | 0.809915000  | -5.836753000 | 1      | -2.929886000 | -2.410693000 | -4.153176000 |
| 1      | -5.655900000 | 0.715516000  | -4.614108000 | 1      | -5.075488000 | -1.181923000 | -3.726379000 |
| 32     | -0.674274000 | 1.230418000  | 0.069864000  | 50     | -0.854828000 | 2.032616000  | 0.116055000  |
| 7      | -1.314898000 | -0.471883000 | 0.942432000  | 7      | -2.220355000 | 0.388797000  | 1.077374000  |
| 6      | -0.436714000 | -0.541504000 | 1.979501000  | 6      | -1.231220000 | -0.116731000 | 1.852297000  |
| 6      | -2.333437000 | -1.318338000 | 0.785651000  | 6      | -3.465120000 | -0.072836000 | 1.144725000  |
| 6      | -2.545226000 | -2.325332000 | 1.696632000  | 6      | -3.815770000 | -1.095602000 | 1.999177000  |
| 6      | -1.668688000 | -2.420310000 | 2.786648000  | 6      | -2.810938000 | -1.637210000 | 2.803343000  |
| 6      | -0.619388000 | -1.546240000 | 2.954608000  | 6      | -1.516952000 | -1.167626000 | 2.747485000  |
| 7      | 0.460836000  | 0.442864000  | 1.808994000  | 7      | -0.080455000 | 0.564736000  | 1.610113000  |
| 6      | 1.461753000  | 0.809565000  | 2.666307000  | 6      | 1.135833000  | 0.374215000  | 2.216462000  |
| 6      | 2.240208000  | 1.932582000  | 2.311499000  | 6      | 2.119860000  | 1.372359000  | 2.050100000  |
| 6      | 3.267845000  | 2.322918000  | 3.136375000  | 6      | 3.354967000  | 1.200928000  | 2.626594000  |
| 6      | 3.519066000  | 1.601256000  | 4.303562000  | 6      | 3.610378000  | 0.047345000  | 3.368158000  |

|   |              |              |              |   |              |              |              |
|---|--------------|--------------|--------------|---|--------------|--------------|--------------|
| 6 | 2.704227000  | 0.518913000  | 4.571961000  | 6 | 2.585517000  | -0.869028000 | 3.488981000  |
| 7 | 1.701601000  | 0.122158000  | 3.787223000  | 7 | 1.381163000  | -0.723663000 | 2.934397000  |
| 1 | -3.367085000 | -3.013857000 | 1.569968000  | 1 | -4.831877000 | -1.459749000 | 2.034414000  |
| 1 | -1.817559000 | -3.204389000 | 3.519487000  | 1 | -3.046713000 | -2.445046000 | 3.485749000  |
| 1 | 0.060344000  | -1.610901000 | 3.786903000  | 1 | -0.731028000 | -1.582201000 | 3.354502000  |
| 1 | 2.003181000  | 2.473527000  | 1.403665000  | 1 | 1.884407000  | 2.264259000  | 1.483616000  |
| 1 | 3.872424000  | 3.184689000  | 2.881123000  | 1 | 4.118322000  | 1.960924000  | 2.510387000  |
| 1 | 4.316449000  | 1.873365000  | 4.980389000  | 1 | 4.567345000  | -0.127229000 | 3.838978000  |
| 1 | 2.858927000  | -0.071280000 | 5.469730000  | 1 | 2.730443000  | -1.779317000 | 4.062141000  |
| 1 | -2.959518000 | -1.145596000 | -0.082363000 | 1 | -4.181623000 | 0.399182000  | 0.483846000  |
| 1 | -5.598386000 | 0.503423000  | -2.138577000 | 1 | -4.998747000 | 0.814597000  | -2.247267000 |
| 1 | 2.567730000  | 0.275736000  | -0.105429000 | 1 | 3.160489000  | 2.148101000  | -0.570954000 |

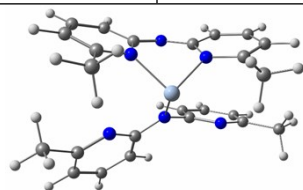

| M = Ge      |              |              |              | M = Sn      |              |              |              |
|-------------|--------------|--------------|--------------|-------------|--------------|--------------|--------------|
| 32          | -0.255544000 | -0.650024000 | -            | 50          | -0.310654000 | -0.687321000 | -            |
| 1.239309000 |              |              |              | 1.292598000 |              |              |              |
| 7           | -0.080165000 | 1.013642000  | -0.191481000 | 7           | 0.009607000  | 1.190419000  | -0.268697000 |
| 7           | -1.359093000 | -1.593541000 | 0.197372000  | 7           | -1.426659000 | -1.549418000 | 0.469430000  |
| 7           | 1.367512000  | -1.446756000 | -0.278981000 | 7           | 1.402702000  | -1.507202000 | -0.023733000 |
| 6           | -0.934904000 | -1.551145000 | 1.491242000  | 6           | -0.967952000 | -1.286038000 | 1.724918000  |
| 6           | -2.627493000 | -1.989025000 | -0.110941000 | 6           | -2.705997000 | -1.971276000 | 0.273174000  |
| 6           | -3.538407000 | -2.274986000 | 0.871169000  | 6           | -3.600928000 | -2.069868000 | 1.305597000  |
| 6           | -3.161086000 | -2.135292000 | 2.217260000  | 6           | -3.186049000 | -1.702177000 | 2.597624000  |
| 6           | -1.883566000 | -1.781947000 | 2.525249000  | 6           | -1.897697000 | -1.318883000 | 2.805934000  |
| 7           | 0.326122000  | -1.326627000 | 1.874711000  | 7           | 0.297397000  | -1.003489000 | 2.049637000  |
| 6           | 2.503954000  | -1.683012000 | -0.997425000 | 6           | 2.566080000  | -1.842148000 | -0.644457000 |
| 6           | 3.715087000  | -1.841179000 | -0.379275000 | 6           | 3.765378000  | -1.852008000 | 0.018837000  |
| 6           | 3.795656000  | -1.696145000 | 1.016201000  | 6           | 3.796757000  | -1.448961000 | 1.363781000  |
| 6           | 2.662307000  | -1.480098000 | 1.736777000  | 6           | 2.634166000  | -1.132767000 | 1.997261000  |
| 6           | 1.398887000  | -1.417364000 | 1.085467000  | 6           | 1.390649000  | -1.221207000 | 1.308305000  |
| 6           | -1.223264000 | 1.765921000  | -0.116122000 | 6           | -1.151575000 | 1.894775000  | -0.177857000 |
| 6           | -1.285263000 | 3.096268000  | 0.348118000  | 6           | -1.293520000 | 3.226470000  | 0.262636000  |
| 6           | -2.506779000 | 3.728364000  | 0.346506000  | 6           | -2.550424000 | 3.784962000  | 0.245575000  |
| 7           | -2.316402000 | 1.142544000  | -0.578296000 | 7           | -2.213295000 | 1.199703000  | -0.629584000 |
| 6           | -3.495630000 | 1.769488000  | -0.579935000 | 6           | -3.427375000 | 1.755010000  | -0.646139000 |
| 6           | -3.642328000 | 3.065577000  | -0.111400000 | 6           | -3.645348000 | 3.049923000  | -0.201900000 |
| 6           | 1.168693000  | 1.484400000  | 0.221871000  | 6           | 1.263245000  | 1.629881000  | 0.122510000  |
| 7           | 2.158460000  | 1.352294000  | -0.658998000 | 7           | 2.256611000  | 1.290318000  | -0.706916000 |
| 6           | 3.400412000  | 1.703708000  | -0.312354000 | 6           | 3.515141000  | 1.592774000  | -0.387652000 |
| 6           | 3.694957000  | 2.214937000  | 0.944577000  | 6           | 3.837213000  | 2.257314000  | 0.790889000  |
| 6           | 1.384713000  | 1.971820000  | 1.516088000  | 6           | 1.507191000  | 2.276206000  | 1.340411000  |
| 6           | 2.664615000  | 2.347573000  | 1.867388000  | 6           | 2.811649000  | 2.594836000  | 1.662097000  |
| 1           | -3.879606000 | -2.326873000 | 3.004671000  | 1           | -3.884788000 | -1.741859000 | 3.424361000  |
| 1           | -1.530955000 | -1.696903000 | 3.542791000  | 1           | -1.519901000 | -1.058828000 | 3.784096000  |
| 1           | -4.535171000 | -2.590328000 | 0.598160000  | 1           | -4.606517000 | -2.416478000 | 1.114610000  |
| 1           | 2.663644000  | -1.384364000 | 2.812849000  | 1           | 2.599747000  | -0.838156000 | 3.036203000  |
| 1           | 4.754816000  | -1.765406000 | 1.514627000  | 1           | 4.739584000  | -1.398385000 | 1.895044000  |
| 1           | 4.595752000  | -2.036379000 | -0.974006000 | 1           | 4.667815000  | -2.131511000 | -0.506026000 |
| 1           | 4.710073000  | 2.492400000  | 1.194881000  | 1           | 4.868982000  | 2.487624000  | 1.020777000  |
| 1           | 2.866771000  | 2.720176000  | 2.864124000  | 1           | 3.032115000  | 3.083555000  | 2.603415000  |
| 1           | 0.565569000  | 2.010994000  | 2.220548000  | 1           | 0.693759000  | 2.467180000  | 2.025662000  |
| 1           | -0.396453000 | 3.610934000  | 0.679179000  | 1           | -0.435048000 | 3.797946000  | 0.580022000  |



|   |              |              |              |   |              |              |              |
|---|--------------|--------------|--------------|---|--------------|--------------|--------------|
| 1 | -2.579206000 | 4.750530000  | 0.698583000  | 1 | -2.683826000 | 4.807952000  | 0.576888000  |
| 1 | -4.611454000 | 3.544132000  | -0.115851000 | 1 | -4.639775000 | 3.472762000  | -0.217999000 |
| 6 | -3.001287000 | -2.101062000 | -1.557606000 | 6 | -3.107444000 | -2.331510000 | -1.126711000 |
| 1 | -2.949181000 | -1.129364000 | -2.050454000 | 1 | -3.086514000 | -1.459949000 | -1.784709000 |
| 1 | -2.325519000 | -2.776998000 | -2.084749000 | 1 | -2.430890000 | -3.079942000 | -1.544597000 |
| 1 | -4.016718000 | -2.483274000 | -1.646814000 | 1 | -4.118703000 | -2.734423000 | -1.136040000 |
| 6 | 2.407054000  | -1.712684000 | -2.492969000 | 6 | 2.507767000  | -2.159365000 | -2.109740000 |
| 1 | 2.181198000  | -0.716449000 | -2.881476000 | 1 | 2.318621000  | -1.254691000 | -2.694767000 |
| 1 | 3.355995000  | -2.039655000 | -2.914637000 | 1 | 3.455988000  | -2.579932000 | -2.440235000 |
| 1 | 1.620640000  | -2.387090000 | -2.833810000 | 1 | 1.713364000  | -2.873344000 | -2.333770000 |
| 6 | 4.453105000  | 1.540929000  | -1.368365000 | 6 | 4.574605000  | 1.208112000  | -1.379048000 |
| 1 | 4.349983000  | 0.569100000  | -1.852262000 | 1 | 4.253637000  | 0.340817000  | -1.954170000 |
| 1 | 4.329265000  | 2.305133000  | -2.139068000 | 1 | 4.748636000  | 2.029173000  | -2.079386000 |
| 1 | 5.455882000  | 1.630238000  | -0.952574000 | 1 | 5.519573000  | 0.983957000  | -0.883959000 |
| 6 | -4.660826000 | 0.996917000  | -1.124307000 | 6 | -4.547868000 | 0.909325000  | -1.173094000 |
| 1 | -5.589036000 | 1.557224000  | -1.023113000 | 1 | -5.485673000 | 1.462154000  | -1.186190000 |
| 1 | -4.504296000 | 0.773245000  | -2.181499000 | 1 | -4.324564000 | 0.576213000  | -2.188256000 |
| 1 | -4.761272000 | 0.047065000  | -0.595774000 | 1 | -4.673452000 | 0.021615000  | -0.549739000 |

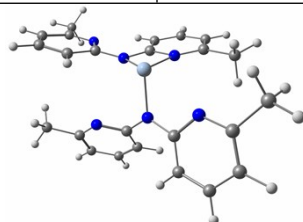

| M = Ge |              |              |              | M = Sn |              |              |              |
|--------|--------------|--------------|--------------|--------|--------------|--------------|--------------|
| 32     | -0.620982000 | 0.470166000  | -1.273521000 | 50     | 0.662991000  | -0.394085000 | -1.366838000 |
| 7      | 1.144941000  | 0.820009000  | -0.327643000 | 7      | -1.245566000 | -0.887852000 | -0.260670000 |
| 6      | 0.693693000  | 1.830261000  | 0.458021000  | 6      | -0.736148000 | -1.841578000 | 0.556120000  |
| 7      | -0.638636000 | 1.948094000  | 0.225347000  | 7      | 0.596125000  | -1.978041000 | 0.315504000  |
| 6      | -1.393819000 | 2.881947000  | 0.812190000  | 6      | 1.351713000  | -2.869796000 | 0.964130000  |
| 6      | -0.814132000 | 3.755939000  | 1.714463000  | 6      | 0.794688000  | -3.685655000 | 1.931327000  |
| 1      | -1.419542000 | 4.511608000  | 2.193917000  | 1      | 1.410230000  | -4.406978000 | 2.449392000  |
| 7      | 3.439656000  | 1.092454000  | 0.069025000  | 7      | -3.529278000 | -1.224509000 | 0.222096000  |
| 6      | 0.550528000  | 3.645318000  | 1.980556000  | 6      | -0.565184000 | -3.553982000 | 2.209920000  |
| 1      | 1.010587000  | 4.325155000  | 2.687687000  | 1      | -1.017992000 | -4.180667000 | 2.969160000  |
| 7      | -1.175476000 | -0.955455000 | -0.045524000 | 7      | 1.158022000  | 1.134619000  | 0.088782000  |
| 6      | 1.333014000  | 2.695518000  | 1.360325000  | 6      | -1.350891000 | -2.647052000 | 1.536177000  |
| 1      | 2.388372000  | 2.597721000  | 1.544969000  | 1      | -2.402396000 | -2.537660000 | 1.732961000  |
| 7      | 0.737777000  | -2.257428000 | -0.091793000 | 7      | -0.749531000 | 2.395906000  | -0.104890000 |
| 6      | -2.843129000 | 2.936844000  | 0.454199000  | 6      | 2.800348000  | -2.941578000 | 0.599421000  |
| 1      | -3.283514000 | 3.874395000  | 0.788990000  | 1      | 3.244804000  | -3.864945000 | 0.967133000  |
| 1      | -3.376795000 | 2.106426000  | 0.919011000  | 1      | 3.339315000  | -2.095968000 | 1.030103000  |
| 1      | -2.969627000 | 2.838728000  | -0.623991000 | 1      | 2.920911000  | -2.891776000 | -0.482924000 |
| 7      | -3.170314000 | -0.073409000 | -0.623878000 | 7      | 3.079609000  | 0.133482000  | -0.472997000 |
| 6      | 2.457871000  | 0.538767000  | -0.637792000 | 6      | -2.574636000 | -0.622562000 | -0.487436000 |
| 6      | 4.712230000  | 0.827554000  | -0.252069000 | 6      | -4.815692000 | -0.967116000 | -0.043775000 |
| 6      | 5.052677000  | -0.005330000 | -1.304725000 | 6      | -5.208794000 | -0.092828000 | -1.042649000 |
| 1      | 6.091018000  | -0.194524000 | -1.540116000 | 1      | -6.257733000 | 0.086969000  | -1.234084000 |
| 6      | 4.024452000  | -0.587966000 | -2.044643000 | 6      | -4.215212000 | 0.544396000  | -1.785873000 |
| 1      | 4.253349000  | -1.248652000 | -2.872277000 | 1      | -4.482432000 | 1.241010000  | -2.571782000 |
| 6      | 2.716202000  | -0.329944000 | -1.714975000 | 6      | -2.893666000 | 0.294154000  | -1.512015000 |
| 1      | 1.895527000  | -0.780036000 | -2.256196000 | 1      | -2.102016000 | 0.791415000  | -2.056258000 |
| 6      | 5.752432000  | 1.493047000  | 0.600345000  | 6      | -5.814820000 | -1.690408000 | 0.811493000  |
| 1      | 5.641122000  | 2.577623000  | 0.547642000  | 1      | -5.680072000 | -2.769050000 | 0.712945000  |
| 1      | 6.760212000  | 1.227914000  | 0.284411000  | 1      | -6.837617000 | -1.437075000 | 0.536401000  |
| 1      | 5.622270000  | 1.203054000  | 1.644446000  | 1      | -5.659935000 | -1.438110000 | 1.862107000  |

|   |              |              |              |   |              |              |              |
|---|--------------|--------------|--------------|---|--------------|--------------|--------------|
| 6 | -0.308208000 | -1.828009000 | 0.612453000  | 6 | 0.282932000  | 2.038603000  | 0.665564000  |
| 6 | 1.621482000  | -3.077343000 | 0.482582000  | 6 | -1.658183000 | 3.249490000  | 0.369046000  |
| 6 | 1.477972000  | -3.512325000 | 1.795800000  | 6 | -1.567853000 | 3.789725000  | 1.648311000  |
| 1 | 2.204254000  | -4.189355000 | 2.225161000  | 1 | -2.315258000 | 4.490268000  | 1.995663000  |
| 6 | 0.397426000  | -3.054071000 | 2.533971000  | 6 | -0.514773000 | 3.397943000  | 2.459742000  |
| 1 | 0.269051000  | -3.357965000 | 3.565670000  | 1 | -0.431254000 | 3.777478000  | 3.470916000  |
| 6 | -0.509378000 | -2.193941000 | 1.947231000  | 6 | 0.424380000  | 2.507989000  | 1.977103000  |
| 1 | -1.350259000 | -1.796130000 | 2.498169000  | 1 | 1.234100000  | 2.153951000  | 2.598892000  |
| 6 | 2.794641000  | -3.508676000 | -0.347260000 | 6 | -2.803793000 | 3.606032000  | -0.532454000 |
| 1 | 2.529757000  | -3.512664000 | -1.403343000 | 1 | -2.521543000 | 3.472931000  | -1.575493000 |
| 1 | 3.136818000  | -4.501689000 | -0.055721000 | 1 | -3.119097000 | 4.637445000  | -0.373192000 |
| 1 | 3.626029000  | -2.812387000 | -0.212644000 | 1 | -3.658584000 | 2.957595000  | -0.327283000 |
| 6 | -2.538275000 | -1.096044000 | -0.029854000 | 6 | 2.513241000  | 1.163459000  | 0.191061000  |
| 6 | -4.496069000 | -0.095173000 | -0.776269000 | 6 | 4.405043000  | 0.037167000  | -0.587453000 |
| 6 | -5.268191000 | -1.142692000 | -0.296094000 | 6 | 5.251333000  | 0.961425000  | 0.007628000  |
| 1 | -6.341769000 | -1.133722000 | -0.423083000 | 1 | 6.323165000  | 0.861619000  | -0.091412000 |
| 6 | -4.621102000 | -2.201068000 | 0.335194000  | 6 | 4.681365000  | 2.019821000  | 0.709039000  |
| 1 | -5.193943000 | -3.042544000 | 0.706163000  | 1 | 5.317267000  | 2.767766000  | 1.167529000  |
| 6 | -3.250857000 | -2.201028000 | 0.472454000  | 6 | 3.313201000  | 2.144458000  | 0.807998000  |
| 1 | -2.736217000 | -3.036200000 | 0.922692000  | 1 | 2.867176000  | 2.989461000  | 1.308957000  |
| 6 | -5.114993000 | 1.081145000  | -1.472032000 | 6 | 4.944834000  | -1.119178000 | -1.376324000 |
| 1 | -6.085278000 | 0.821625000  | -1.893352000 | 1 | 5.867025000  | -0.842060000 | -1.886105000 |
| 1 | -4.460776000 | 1.434832000  | -2.268749000 | 1 | 4.215621000  | -1.450667000 | -2.114977000 |
| 1 | -5.263656000 | 1.905249000  | -0.769945000 | 1 | 5.170489000  | -1.961507000 | -0.718174000 |

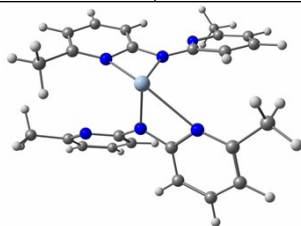

| M = Ge |              |              |              | M = Sn |              |              |              |
|--------|--------------|--------------|--------------|--------|--------------|--------------|--------------|
| 32     | 0.062996000  | -0.361255000 | -1.667179000 | 50     | -0.100595000 | 0.402606000  | -1.721180000 |
| 7      | 0.590634000  | -1.422460000 | -0.078998000 | 7      | -0.714102000 | 1.397230000  | 0.133736000  |
| 7      | 1.359460000  | 1.224045000  | -1.132971000 | 7      | -1.284751000 | -1.487771000 | -0.981406000 |
| 7      | -2.094247000 | 2.408910000  | 0.873215000  | 7      | 2.311195000  | -2.243041000 | 1.024974000  |
| 6      | 0.386453000  | 1.899379000  | -0.480637000 | 6      | -0.217635000 | -2.021203000 | -0.343585000 |
| 6      | 2.567443000  | 1.738430000  | -1.376657000 | 6      | -2.457978000 | -2.116814000 | -1.073123000 |
| 6      | 2.888706000  | 2.980535000  | -0.859201000 | 6      | -2.646811000 | -3.331283000 | -0.437990000 |
| 6      | 1.921041000  | 3.674166000  | -0.129294000 | 6      | -1.576201000 | -3.881766000 | 0.266759000  |
| 6      | 0.654633000  | 3.165421000  | 0.065936000  | 6      | -0.351164000 | -3.254043000 | 0.324110000  |
| 7      | -0.740282000 | 1.143264000  | -0.556751000 | 7      | 0.866722000  | -1.218410000 | -0.525728000 |
| 6      | -3.305193000 | 2.716357000  | 1.354787000  | 6      | 3.544069000  | -2.413781000 | 1.518055000  |
| 6      | -4.458874000 | 2.086908000  | 0.917690000  | 6      | 4.650717000  | -1.763973000 | 0.997533000  |
| 6      | -4.344799000 | 1.110898000  | -0.071025000 | 6      | 4.462889000  | -0.914080000 | -0.091680000 |
| 6      | -3.106340000 | 0.794400000  | -0.574619000 | 6      | 3.201871000  | -0.740612000 | -0.606507000 |
| 6      | -1.983994000 | 1.470349000  | -0.063352000 | 6      | 2.124597000  | -1.425844000 | -0.010455000 |
| 6      | 1.657854000  | -1.254940000 | 0.799780000  | 6      | -1.824200000 | 1.237865000  | 0.943568000  |
| 6      | 1.459914000  | -1.238803000 | 2.188167000  | 6      | -1.738538000 | 1.231529000  | 2.344337000  |
| 6      | 2.553449000  | -1.051670000 | 3.006423000  | 6      | -2.894683000 | 1.054223000  | 3.074632000  |
| 7      | 2.859560000  | -1.066497000 | 0.259492000  | 7      | -2.982935000 | 1.031422000  | 0.311868000  |
| 6      | 3.914174000  | -0.866142000 | 1.055370000  | 6      | -4.097225000 | 0.851481000  | 1.024875000  |
| 6      | 3.807569000  | -0.867300000 | 2.439902000  | 6      | -4.101746000 | 0.873910000  | 2.414295000  |
| 6      | -0.426198000 | -2.308566000 | 0.148680000  | 6      | 0.326844000  | 2.229374000  | 0.394841000  |
| 7      | -1.491420000 | -2.058448000 | -0.628258000 | 7      | 1.337457000  | 2.037510000  | -0.482109000 |
| 6      | -2.537767000 | -2.888361000 | -0.636982000 | 6      | 2.410249000  | 2.832282000  | -0.487303000 |

|   |              |              |              |   |              |              |              |
|---|--------------|--------------|--------------|---|--------------|--------------|--------------|
| 6 | -2.582461000 | -3.999275000 | 0.190791000  | 6 | 2.551617000  | 3.849942000  | 0.442404000  |
| 6 | -0.396619000 | -3.419942000 | 1.009488000  | 6 | 0.405051000  | 3.253955000  | 1.357447000  |
| 6 | -1.493473000 | -4.251681000 | 1.021487000  | 6 | 1.529832000  | 4.047187000  | 1.367857000  |
| 1 | 2.164415000  | 4.645822000  | 0.283757000  | 1 | -1.703861000 | -4.830491000 | 0.774622000  |
| 1 | -0.105621000 | 3.694308000  | 0.613951000  | 1 | 0.482422000  | -3.671622000 | 0.861005000  |
| 1 | 3.868490000  | 3.401627000  | -1.034133000 | 1 | -3.600333000 | -3.835947000 | -0.500976000 |
| 1 | -2.973685000 | 0.057601000  | -1.353261000 | 1 | 3.020678000  | -0.109711000 | -1.465522000 |
| 1 | -5.229071000 | 0.611110000  | -0.448532000 | 1 | 5.308175000  | -0.402594000 | -0.537074000 |
| 1 | -5.420406000 | 2.356881000  | 1.332050000  | 1 | 5.631370000  | -1.922617000 | 1.424350000  |
| 1 | -3.444254000 | -4.651858000 | 0.179562000  | 1 | 3.430984000  | 4.478294000  | 0.430443000  |
| 1 | -1.497257000 | -5.120780000 | 1.668342000  | 1 | 1.607808000  | 4.848396000  | 2.093107000  |
| 1 | 0.473073000  | -3.627723000 | 1.614713000  | 1 | -0.411577000 | 3.435534000  | 2.038867000  |
| 1 | 0.465072000  | -1.351971000 | 2.595546000  | 1 | -0.779294000 | 1.333771000  | 2.831028000  |
| 1 | 2.428966000  | -1.033361000 | 4.082230000  | 1 | -2.854964000 | 1.044243000  | 4.157156000  |
| 1 | 4.684891000  | -0.716632000 | 3.054179000  | 1 | -5.026776000 | 0.739237000  | 2.958308000  |
| 6 | 3.480433000  | 0.943495000  | -2.253088000 | 6 | -3.499692000 | -1.467355000 | -1.928835000 |
| 6 | -3.337632000 | 3.789507000  | 2.402896000  | 6 | 3.656259000  | -3.357768000 | 2.679331000  |
| 6 | -3.669728000 | -2.552223000 | -1.561142000 | 6 | 3.456263000  | 2.578156000  | -1.531001000 |
| 6 | 5.230891000  | -0.620941000 | 0.377560000  | 6 | -5.363296000 | 0.603840000  | 0.256355000  |
| 1 | 4.478303000  | 1.377835000  | -2.276724000 | 1 | -4.470125000 | -1.944080000 | -1.801920000 |
| 1 | 3.532969000  | -0.086771000 | -1.902720000 | 1 | -3.576232000 | -0.407393000 | -1.687224000 |
| 1 | 3.084662000  | 0.934755000  | -3.272032000 | 1 | -3.211753000 | -1.553901000 | -2.979821000 |
| 1 | -2.699880000 | 3.511050000  | 3.243321000  | 1 | 3.009223000  | -3.027158000 | 3.493347000  |
| 1 | -2.947008000 | 4.723426000  | 1.994098000  | 1 | 3.322880000  | -4.354631000 | 2.384255000  |
| 1 | -4.348457000 | 3.963366000  | 2.768510000  | 1 | 4.679575000  | -3.424911000 | 3.045590000  |
| 1 | -3.290492000 | -2.105592000 | -2.480445000 | 1 | 3.010573000  | 2.136050000  | -2.422197000 |
| 1 | -4.343957000 | -1.834684000 | -1.087589000 | 1 | 4.214036000  | 1.890506000  | -1.149704000 |
| 1 | -4.247954000 | -3.441328000 | -1.808733000 | 1 | 3.956643000  | 3.505148000  | -1.808430000 |
| 1 | 6.063172000  | -0.771090000 | 1.064024000  | 1 | -6.237529000 | 0.909807000  | 0.830202000  |
| 1 | 5.276995000  | 0.407398000  | 0.010267000  | 1 | -5.466562000 | -0.460922000 | 0.033589000  |
| 1 | 5.348347000  | -1.284950000 | -0.478524000 | 1 | -5.347262000 | 1.144774000  | -0.688891000 |

Supplement: d1dt00717c1.pdf [file d1dt00717c1.pdf]
